# Supplementary material for: Exploring the effect of Jasmonic Acid for Aphids control for improving the yield of Triticum aestivum varieties
Source: PeerJ. 2022 Oct 27;10:e14018. doi: 10.7717/peerj.14018 (PMC9618260; doi:10.7717/peerj.14018)
Supplement: Supplemental Information 1 [file peerj-10-14018-s001.xlsx]

## Sheet: Sheet1
			Plant height	MEAN	SD	SE	shoot length	MEAN	SD	SE	root length	MEAN	SD	SE	fresh root wt.	MEAN	SD	SE	F.shoot wt.	MEAN	SD	SE	Dry root wt.	MEAN	Sd	SE	D. shoot wt.	MEAN	SD	SE	leaf width cm	L. lengthcm	leaf area	MEAN	SD	SE	leaf fresh wt.	mean	sd	SE	L. dry wt.	mean	SD	SE	L. turgid wt.	L. water content	MEAN	SD	SE
	replication	V1
1	1	control	47	47.8	0.72111	0.416345	42	42	1	0.577367	5	5.8	1.0583	0.611028	0.3	0.2	0.1	0.0577367	1.02	1.09	0.330606	0.190881	0.15	0.113333	0.0404145	0.023334	0.96	0.923333	0.306649	0.177049	0.6	12	7.2	8.3	2.53574	1.46406	0.12	0.123333	0.0057735	0.00333343	0.04	0.045	0.02	0.0115473	0.16	66.6667	84.7222	16.8394	9.72251
2	2		48				41				7				0.2				0.8				0.07				0.6				0.7	16	11.2				0.13				0.06				0.14	87.5
3	3		48.4				43				5.4				0.1				1.45				0.12				1.21				0.5	13	6.5				0.12				0.02				0.12	100
4	1	JA o.1mM	51	51.5667	0.51316	0.296282	43	44.6333	1.43643	0.829348	8	6.93333	0.929157	0.536465	0.1	0.166667	0.057735	0.0333343	1.01	1.32667	0.274287	0.158364	0.1	0.166667	0.057735	0.0333343	0.92	0.956667	0.0321455	0.0185598	0.5	10	5	5.53333	0.92376	0.533349	0.12	0.123333	0.0057735	0.00333343	0.05	0.0533333	0.0057735	0.00333343	0.16	63.6364	68.3502	8.16455	4.71394
5	2		51.7				45.2				6.5				0.2				1.48				0.2				0.98				0.6	11	6.6				0.13				0.06				0.15	77.7778
6	3		52				45.7				6.3				0.2				1.49				0.2				0.97				0.5	10	5				0.12				0.05				0.16	63.6364
7	1	1mM	53	53.4333	0.51316	0.296282	45	44.6667	0.57735	0.333343	8	8.76667	0.680686	0.393006	0.1	0.116667	0.0152753	0.00881943	0.9	0.92	0.02	0.0115473	0.24	0.223333	0.0152753	0.00881943	0.35	0.363333	0.0152753	0.00881943	0.5	10	5	5.90667	0.794313	0.45861	0.08	0.0833333	0.0057735	0.00333343	0.04	0.0433333	0.0057735	0.00333343	0.13	44.4444	42.5926	8.48625	4.89968
8	2		53.3				44				9.3				0.13				0.92				0.21				0.36				0.6	10.8	6.48				0.08				0.05				0.14	33.3333
9	3		54				45				9				0.12				0.94				0.22				0.38				0.6	10.4	6.24				0.09				0.04				0.14	50
10	1	Aphids	40	38.3333	2.08167	1.20189	29	27.5	1.94679	1.12401	11	10.8333	0.152753	0.0881943	0.4	0.3	0.1	0.0577367	2.2	1.53333	0.763763	0.440971	0.23	0.126667	0.0896289	0.0517488	1.93	1.14333	0.816476	0.471407	0.6	13	7.8	7.73333	4.90034	2.8293	0.08	0.1	0.052915	0.0305514	0.04	0.0433333	0.0057735	0.00333343	0.1	66.6667	65.0794	14.3517	8.2862
11	2		36				25.3				10.7				0.2				0.7				0.08				0.3				0.4	7	2.8				0.06				0.04				0.08	50
12	3		39				28.2				10.8				0.3				1.7				0.07				1.2				0.7	18	12.6				0.16				0.05				0.19	78.5714
13	1	aphid+0.1mM	44	46.3	2.85832	1.6503	35.5	37.1667	2.46644	1.42404	8.5	9.13333	0.550757	0.317989	0.4	0.4	6.7987e-17	3.92535e-17	1.2	1.46667	0.251661	0.145301	0.21	0.18	0.0360555	0.0208173	0.6	0.86	0.307896	0.177769	0.6	15	9	7	1.73205	1.00003	0.17	0.103333	0.0585947	0.0338306	0.1	0.05	0.043589	0.0251669	0.19	77.7778	70.9259	9.56352	5.52166
14	2		49.5				40				9.5				0.4				1.7				0.19				1.2				0.4	15	6				0.08				0.02				0.1	75
15	3		45.4				36				9.4				0.4				1.5				0.14				0.78				0.4	15	6				0.06				0.03				0.08	60
16	1	aphid+1mM	49	47.5667	1.2897	0.744632	37.4	36.3333	1.51438	0.874351	11.6	11.2333	1.58219	0.913506	0.2	0.233333	0.057735	0.0333343	1.2	1.04	0.150997	0.0871805	0.11	0.126667	0.0208167	0.0120189	0.87	0.743333	0.210792	0.121704	0.5	14	7	5.66667	1.52753	0.881943	0.16	0.0966667	0.0568624	0.0328305	0.06	0.04	0.02	0.0115473	0.18	83.3333	66.6667	16.6667	9.62279
17	2		46.5				37				9.5				0.3				0.9				0.15				0.5				0.4	10	4				0.05				0.02				0.08	50
18	3		47.2				34.6				12.6				0.2				1.02				0.12				0.86				0.6	10	6				0.08				0.04				0.1	66.6667
	V2
19	1	control	45	54	7.81025	4.50938	39	45	5.56776	3.21464	6	9	3	1.7321	0.2	0.3	0.1	0.0577367	1.08	1.76333	0.599361	0.346051	0.09	0.176667	0.0757188	0.0437175	1.2	1.60333	0.352184	0.203339	0.7	11	7.7	10.8333	3.89915	2.25124	0.09	0.123333	0.0305505	0.0176389	0.02	0.0533333	0.0305505	0.0176389	0.12	70	72.5926	4.4905	2.59267
20	2		58				46				12				0.4				2.2				0.23				1.76				0.8	19	15.2				0.15				0.08				0.18	70
21	3		59				50				9				0.3				2.01				0.21				1.85				0.6	16	9.6				0.13				0.06				0.15	77.7778
22	1	JA o.1mM	43	43.4	0.360555	0.208173	37	37.3333	0.305505	0.176389	6	6.06667	0.208167	0.120189	0.1	0.173333	0.110151	0.0635978	0.8	0.81	0.01	0.00577367	0.09	0.0866667	0.0057735	0.00333343	0.25	0.273333	0.0208167	0.0120189	0.5	10	5	5.13333	0.80829	0.46668	0.12	0.116667	0.0057735	0.00333343	0.04	0.05	0.01	0.00577367	0.15	72.7273	60.3535	11.4975	6.6383
23	2		43.7				37.4				6.3				0.12				0.82				0.09				0.28				0.4	11	4.4				0.12				0.05				0.17	58.3333
24	3		43.5				37.6				5.9				0.3				0.81				0.08				0.29				0.5	12	6				0.11				0.06				0.16	50
25	1	1mM	44	44.4667	0.416333	0.240377	38	38.2	0.2	0.115473	6	6.26667	0.23094	0.133337	0.1	0.106667	0.011547	0.00666686	0.9	0.913333	0.0152753	0.00881943	0.09	0.07	0.02	0.0115473	0.22	0.246667	0.023094	0.0133337	0.6	11	6.6	6.53333	0.503322	0.290602	0.12	0.123333	0.0057735	0.00333343	0.04	0.05	0.01	0.00577367	0.15	72.7273	76.0943	11.4874	6.63242
26	2		44.6				38.2				6.4				0.12				0.91				0.07				0.26				0.6	10	6				0.13				0.05				0.14	88.8889
27	3		44.8				38.4				6.4				0.1				0.93				0.05				0.26				0.7	10	7				0.12				0.06				0.15	66.6667
28	1	Aphids	42.7	43.5667	1.25033	0.721901	34	35.4667	3.44287	1.9878	8.7	8.1	2.26053	1.30516	0.2	0.24	0.0608276	0.0351199	1.05	1.11667	0.35473	0.204809	0.12	0.13	0.01	0.00577367	0.92	0.693333	0.418848	0.241829	0.4	9	3.6	6.29333	4.25607	2.45732	0.06	0.11	0.0458258	0.0264583	0.04	0.0466667	0.0057735	0.00333343	0.08	50	72.8956	20.887	12.0594
29	2		45				39.4				5.6				0.31				1.5				0.14				0.95				0.7	16	11.2				0.15				0.05				0.16	90.9091
30	3		43				33				10				0.21				0.8				0.13				0.21				0.4	10.2	4.08				0.12				0.05				0.14	77.7778
31	1	aphid+0.1mM	39	41.3333	3.21455	1.85598	32	33.6667	2.08167	1.20189	7	7.66667	1.1547	0.666686	0.2	0.2	3.39935e-17	1.96267e-17	0.96	0.98	0.0916515	0.0529166	0.1	0.103333	0.0152753	0.00881943	0.68	0.553333	0.310054	0.179015	0.3	8	2.4	5.7	2.86182	1.65232	0.09	0.09	0.02	0.0115473	0.06	0.03	0.0264575	0.0152757	0.09	100	91.9048	7.33086	4.2326
32	2		45				36				9				0.2				1.08				0.12				0.78				0.5	15	7.5				0.11				0.02				0.12	90
33	3		40				33				7				0.2				0.9				0.09				0.2				0.6	12	7.2				0.07				0.01				0.08	85.7143
34	1	aphid+1mM	39	40.6667	2.88675	1.66672	30	33.6667	3.51188	2.02765	9	7	2	1.15473	0.15	0.15	0.05	0.0288684	0.7	0.633333	0.057735	0.0333343	0.11	0.0866667	0.0251661	0.0145301	0.09	0.0966667	0.0057735	0.00333343	0.4	6	2.4	4.66667	2.11975	1.22387	0.09	0.09	0.02	0.0115473	0.06	0.03	0.0264575	0.0152757	0.09	100	91.9048	7.33086	4.2326
35	2		39				34				5				0.1				0.6				0.06				0.1				0.5	10	5				0.11				0.02				0.12	90
36	3		44				37				7				0.2				0.6				0.09				0.1				0.6	11	6.6				0.07				0.01				0.08	85.7143
[truncated: 4 more columns]

## Sheet: Sheet2
mean		Borlaug-2015	Zincol-2015
	Control	44.8	48
	0.1 mM JA	50.5667	53.4
	1 mM JA	54.4333	56.4667
	Aphid	38.3333	43.5667
	0.1 mM + aphid	46.3	48.3333
	1 mM JA + aphid	49.5667	52.6667
SE	Control	0.216345	0.309382
	0.1 Mm JA	0.296282	0.208173
	1 mM JA	0.296282	0.240377
	Aphid	1.20189	0.721901
	0.1 mM + aphid	1.6503	1.85598
	1 mM JA + aphid	0.744632	1.66672
		Borlaug-2015	Zincol-2015
mean	Control	42	45
	0.1 mM JA	44.6333	37.3333
	1 mM JA	44.6667	38.2
	Aphid	27.5	35.4667
	0.1 mM + aphid	37.1667	33.6667
	1 mM JA + aphid	36.3333	33.6667
SE	Control	0.577367	3.21464
	0.1 Mm JA	0.829348	0.176389
	1 mM JA	0.333343	0.115473
	Aphid	1.12401	1.9878
	0.1 mM + aphid	1.42404	1.20189
	1 mM JA + aphid	0.874351	2.02765
		Borlaug-2015	Zincol-2015
mean	Control	5.8	8
	0.1 mM JA	7.93333	6.26667
	1 mM JA	8.76667	7.26667
	Aphid	10.8333	8.1
	0.1 mM + aphid	11.1333	9.66667
	1 mM JA + aphid	11.2333	10.345
SE	Control	0.611028	1.7321
	0.1 Mm JA	0.536465	0.120189
	1 mM JA	0.393006	0.133337
	Aphid	0.0881943	1.30516
	0.1 mM + aphid	0.317989	0.666686
	1 mM JA + aphid	0.913506	1.15473
		Borlaug-2015	Zincol-2015
mean	Control	0.2	0.28
	0.1 mM JA	0.266667	0.276333
	1 mM JA	0.276667	0.289967
	Aphid	0.25	0.24
	0.1 mM + aphid	0.3	0.2
	1 mM JA + aphid	0.233333	0.15
SE	Control	0.0577367	0.0577367
	0.1 Mm JA	0.0333343	0.0635978
	1 mM JA	0.00881943	0.00666686
	Aphid	0.0577367	0.0351199
	0.1 mM + aphid	3.92535e-17	1.96267e-17
	1 mM JA + aphid	0.0333343	0.0288684
		Borlaug-2015	Zincol-2015
mean	Control	1.09	1.16333
	0.1 mM JA	1.32667	1.23
	1 mM JA	1.34	1.25
	Aphid	0.98	0.96
	0.1 mM + aphid	1.46667	1.23
	1 mM JA + aphid	1.49	1.26
SE	Control	0.190881	0.346051
	0.1 Mm JA	0.158364	0.00577367
	1 mM JA	0.0115473	0.00881943
	Aphid	0.440971	0.204809
	0.1 mM + aphid	0.145301	0.0529166
	1 mM JA + aphid	0.0871805	0.0333343
				Borlaug-2015	Zincol-2015
		mean	Control	0.113333	0.176667
			0.1 mM JA	0.166667	0.0866667
			1 mM JA	0.223333	0.07
			Aphid	0.126667	0.13
			0.1 mM + aphid	0.18	0.103333
			1 mM JA + aphid	0.126667	0.0866667
		SE	Control	0.023334	0.0437175
			0.1 Mm JA	0.0333343	0.00333343
			1 mM JA	0.00881943	0.0115473
			Aphid	0.0517488	0.00577367
			0.1 mM + aphid	0.0208173	0.00881943
			1 mM JA + aphid	0.0120189	0.0145301
				Borlaug-2015	Zincol-2015
		mean	Control	0.923333	1.60333
			0.1 mM JA	0.956667	0.273333
			1 mM JA	0.363333	0.246667
			Aphid	1.14333	0.693333
			0.1 mM + aphid	0.86	0.553333
			1 mM JA + aphid	0.743333	0.0966667
		SE	Control	0.177049	0.203339
			0.1 Mm JA	0.0185598	0.0120189
			1 mM JA	0.00881943	0.0133337
			Aphid	0.471407	0.241829
			0.1 mM + aphid	0.177769	0.179015
			1 mM JA + aphid	0.121704	0.00333343
				Borlaug-2015	Zincol-2015
		mean	Control	8.3	10.8333
			0.1 mM JA	5.51333	5.13333
			1 mM JA	5.90667	6.53333
			Aphid	6.33333	6.29333
			0.1 mM + aphid	7	5.7
			1 mM JA + aphid	5.66667	4.66667
		SE	Control	1.46406	2.25124
			0.1 Mm JA	0.533349	0.46668
			1 mM JA	0.45861	0.290602
			Aphid	2.8293	2.45732
			0.1 mM + aphid	1.00003	1.65232
			1 mM JA + aphid	0.881943	1.22387
				Borlaug-2015	Zincol-2015
		mean	Control	84.4222	72.4493
			0.1 mM JA	67.3502	68.3535
			1 mM JA	68.5926	76.0943
			Aphid	63.0794	72.8956
			0.1 mM + aphid	70.9259	91.9048
			1 mM JA + aphid	71.6667	92.9048
		SE	Control	9.72251	2.59267
			0.1 Mm JA	4.71394	6.6383
			1 mM JA	4.89968	6.63242
			Aphid	8.2862	12.0594
			0.1 mM + aphid	5.52166	4.2326
			1 mM JA + aphid	9.62279	4.2326
			Borlaug-2015	Zincol-2015
	mean	Control	0.123333	0.123333
		0.1 Mm JA	0.123333	0.116667
		1 mM JA	0.0833333	0.123333
		Aphid	0.1	0.11
		0.1 mM + aphid	0.103333	0.09
		1 mM JA + aphid	0.0966667	0.09
	SE	Control	0.00333343	0.0176389
		0.1 Mm JA	0.00333343	0.00333343
		1 mM JA	0.00333343	0.00333343
		Aphid	0.0305514	0.0264583
		0.1 mM + aphid	0.0338306	0.0115473
		1 mM JA + aphid	0.0328305	0.0115473
			Borlaug-2015	Zincol-2015
	mean	Control	0.045	0.0533333
		0.1 Mm JA	0.0533333	0.05
		1 mM JA	0.0433333	0.05
		Aphid	0.0433333	0.0466667
		0.1 mM + aphid	0.05	0.03
		1 mM JA + aphid	0.04	0.03
	SE	Control
		0.1 Mm JA
		1 mM JA
		Aphid
		0.1 mM + aphid
		1 mM JA + aphid
