# Supplementary material for: Exploring the effect of Jasmonic Acid for Aphids control for improving the yield of Triticum aestivum varieties
Source: PeerJ. 2022 Oct 27;10:e14018. doi: 10.7717/peerj.14018 (PMC9618260; doi:10.7717/peerj.14018)
Supplement: Supplemental Information 2 [file peerj-10-14018-s002.xlsx]

## Sheet: Sheet1
C H L O R O P H Y L L A												C H L O R O P H Y L L B											C A R O T E N O I D S
Chl. a (mgg-1f.wt.) = [12.7 (O.D. 663) - 2.69 (O.D. 645)] ×V/1000W												Chl. b (mgg-1f.wt.) = [22.9 (O.D. 645) - 4.68 (O.D. 663)] ×V/1000 W											Carotenoid (mgg-1f.wt.) = [(O.D. 480) + 0.114 (O.D. 663) - 0.638 (O.D. 645)] ×V/1000 EM
	Optical Density			Constant Values				V=Volume of sample, W=weight of sample				Optical Density			Constant Values								Optical Density			Constant Values
Samples	663	645	480	K (2.69)	K (12.7)	12.7*(OD663)	2.69*(OD645)	[12.7 (O.D. 663) - 2.69 (O.D. 645)]	V/1000W	CHL.A		663	645	480	K (22.9)	K (4.68)	(22.9)*(OD 645)	(4.68)*(OD 663)	[22.9 (O.D. 645) - 4.68 (O.D. 663)]	V/1000W	Chl.b		663	645	480	K (0.114)	K (0.638)	(OD 480)	(0.114)(OD 663)	(0.638)(OD 645)	[(O.D. 480) + 0.114 (O.D. 663) - 0.638 (O.D. 645)]	Carotenoids= [(O.D. 480) + 0.114 (O.D. 663) - 0.638 (O.D. 645)] ×V/1000 EM
1	3.368	1.951	2.452	2.69	12.7	42.7736	5.24819	37.5254	0.005	0.187627		3.368	1.951	2.452	22.9	4.68	44.6779	15.7622	28.9157	0.005	0.144578		3.368	1.951	2.452	0.114	0.638	2.452	0.383952	1.24474	1.59121	0.0636486
2	2.247	1.943	1.984	2.69	12.7	28.5369	5.22667	23.3102	0.005	0.116551		2.247	1.943	1.984	22.9	4.68	44.4947	10.516	33.9787	0.005	0.169894		2.247	1.943	1.984	0.114	0.638	1.984	0.256158	1.23963	1.00052	0.040021
3	2.973	1.889	0.983	2.69	12.7	37.7571	5.08141	32.6757	0.005	0.163378		2.973	1.889	0.983	22.9	4.68	43.2581	13.9136	29.3445	0.005	0.146722		2.973	1.889	0.983	0.114	0.638	0.983	0.338922	1.20518	0.11674	0.0046696
4	3.458	1.945	2.441	2.69	12.7	43.9166	5.23205	38.6846	0.005	0.193423		3.458	1.945	2.441	22.9	4.68	44.5405	16.1834	28.3571	0.005	0.141785		3.458	1.945	2.441	0.114	0.638	2.441	0.394212	1.24091	1.5943	0.0637721
5	3.247	1.977	1.992	2.69	12.7	41.2369	5.31813	35.9188	0.005	0.179594		3.247	1.977	1.992	22.9	4.68	45.2733	15.196	30.0773	0.005	0.150387		3.247	1.977	1.992	0.114	0.638	1.992	0.370158	1.26133	1.10083	0.0440333
6	2.993	1.943	0.959	2.69	12.7	38.0111	5.22667	32.7844	0.005	0.163922		2.993	1.943	0.959	22.9	4.68	44.4947	14.0072	30.4875	0.005	0.152437		2.993	1.943	0.959	0.114	0.638	0.959	0.341202	1.23963	0.060568	0.00242272
7	3.658	2.114	2.541	2.69	12.7	46.4566	5.68666	40.7699	0.005	0.20385		3.658	2.114	2.541	22.9	4.68	48.4106	17.1194	31.2912	0.005	0.156456		3.658	2.114	2.541	0.114	0.638	2.541	0.417012	1.34873	1.60928	0.0643712
8	3.677	1.998	2.112	2.69	12.7	46.6979	5.37462	41.3233	0.005	0.206616		3.677	1.998	2.112	22.9	4.68	45.7542	17.2084	28.5458	0.005	0.142729		3.677	1.998	2.112	0.114	0.638	2.112	0.419178	1.27472	1.25645	0.0502582
9	3.114	1.953	0.969	2.69	12.7	39.5478	5.25357	34.2942	0.005	0.171471		3.114	1.953	0.969	22.9	4.68	44.7237	14.5735	30.1502	0.005	0.150751		3.114	1.953	0.969	0.114	0.638	0.969	0.354996	1.24601	0.077982	0.00311928
10	1.507	0.932	0.658	2.69	12.7	19.1389	2.50708	16.6318	0.005	0.0831591		1.507	0.932	0.658	22.9	4.68	21.3428	7.05276	14.29	0.005	0.0714502		1.507	0.932	0.658	0.114	0.638	0.658	0.171798	0.594616	0.235182	0.00940728
11	1.467	0.889	0.611	2.69	12.7	18.6309	2.39141	16.2395	0.005	0.0811975		1.467	0.889	0.611	22.9	4.68	20.3581	6.86556	13.4925	0.005	0.0674627		1.467	0.889	0.611	0.114	0.638	0.611	0.167238	0.567182	0.211056	0.00844224
12	1.578	0.856	0.678	2.69	12.7	20.0406	2.30264	17.738	0.005	0.0886898		1.578	0.856	0.678	22.9	4.68	19.6024	7.38504	12.2174	0.005	0.0610868		1.578	0.856	0.678	0.114	0.638	0.678	0.179892	0.546128	0.311764	0.0124706
13	1.454	0.826	0.917	2.69	12.7	18.4658	2.22194	16.2439	0.005	0.0812193		1.454	0.826	0.917	22.9	4.68	18.9154	6.80472	12.1107	0.005	0.0605534		1.454	0.826	0.917	0.114	0.638	0.917	0.165756	0.526988	0.555768	0.0222307
14	1.261	0.831	0.951	2.69	12.7	16.0147	2.23539	13.7793	0.005	0.0688966		1.261	0.831	0.951	22.9	4.68	19.0299	5.90148	13.1284	0.005	0.0656421		1.261	0.831	0.951	0.114	0.638	0.951	0.143754	0.530178	0.564576	0.022583
15	1.459	0.976	0.967	2.69	12.7	18.5293	2.62544	15.9039	0.005	0.0795193		1.459	0.976	0.967	22.9	4.68	22.3504	6.82812	15.5223	0.005	0.0776114		1.459	0.976	0.967	0.114	0.638	0.967	0.166326	0.622688	0.510638	0.0204255
16	1.655	0.877	0.932	2.69	12.7	21.0185	2.35913	18.6594	0.005	0.0932969		1.655	0.877	0.932	22.9	4.68	20.0833	7.7454	12.3379	0.005	0.0616895		1.655	0.877	0.932	0.114	0.638	0.932	0.18867	0.559526	0.561144	0.0224458
17	1.765	0.901	0.926	2.69	12.7	22.4155	2.42369	19.9918	0.005	0.099959		1.765	0.901	0.926	22.9	4.68	20.6329	8.2602	12.3727	0.005	0.0618635		1.765	0.901	0.926	0.114	0.638	0.926	0.20121	0.574838	0.552372	0.0220949
18	1.634	0.913	0.974	2.69	12.7	20.7518	2.45597	18.2958	0.005	0.0914791		1.634	0.913	0.974	22.9	4.68	20.9077	7.64712	13.2606	0.005	0.0663029		1.634	0.913	0.974	0.114	0.638	0.974	0.186276	0.582494	0.577782	0.0231113
19	3.468	1.961	2.442	2.69	12.7	44.0436	5.27509	38.7685	0.005	0.193843		3.468	1.961	2.442	22.9	4.68	44.9069	16.2302	28.6767	0.005	0.143383		3.468	1.961	2.442	0.114	0.638	2.442	0.395352	1.25112	1.58623	0.0634494
20	2.347	1.973	1.944	2.69	12.7	29.8069	5.30737	24.4995	0.005	0.122498		2.347	1.973	1.944	22.9	4.68	45.1817	10.984	34.1977	0.005	0.170989		2.347	1.973	1.944	0.114	0.638	1.944	0.267558	1.25877	0.952784	0.0381114
21	2.993	1.989	0.993	2.69	12.7	38.0111	5.35041	32.6607	0.005	0.163303		2.993	1.989	0.993	22.9	4.68	45.5481	14.0072	31.5409	0.005	0.157704		2.993	1.989	0.993	0.114	0.638	0.993	0.341202	1.26898	0.06522	0.0026088
22	3.458	1.945	2.441	2.69	12.7	43.9166	5.23205	38.6846	0.005	0.193423		3.458	1.945	2.441	22.9	4.68	44.5405	16.1834	28.3571	0.005	0.141785		3.458	1.945	2.441	0.114	0.638	2.441	0.394212	1.24091	1.5943	0.0637721
23	2.951	1.795	2.884	2.69	12.7	37.4777	4.82855	32.6491	0.005	0.163246		2.951	1.795	2.884	22.9	4.68	41.1055	13.8107	27.2948	0.005	0.136474		2.951	1.795	2.884	0.114	0.638	2.884	0.336414	1.14521	2.0752	0.0830082
24	2.682	1.979	2.722	2.69	12.7	34.0614	5.32351	28.7379	0.005	0.143689		2.682	1.979	2.722	22.9	4.68	45.3191	12.5518	32.7673	0.005	0.163837		2.682	1.979	2.722	0.114	0.638	2.722	0.305748	1.2626	1.76515	0.0706058
25	3.258	2.004	2.141	2.69	12.7	41.3766	5.39076	35.9858	0.005	0.179929		3.258	2.004	2.141	22.9	4.68	45.8916	15.2474	30.6442	0.005	0.153221		3.258	2.004	2.141	0.114	0.638	2.141	0.371412	1.27855	1.23386	0.0493544
26	3.177	1.978	2.142	2.69	12.7	40.3479	5.32082	35.0271	0.005	0.175135		3.177	1.978	2.142	22.9	4.68	45.2962	14.8684	30.4278	0.005	0.152139		3.177	1.978	2.142	0.114	0.638	2.142	0.362178	1.26196	1.24221	0.0496886
27	3.014	1.853	0.979	2.69	12.7	38.2778	4.98457	33.2932	0.005	0.166466		3.014	1.853	0.979	22.9	4.68	42.4337	14.1055	28.3282	0.005	0.141641		3.014	1.853	0.979	0.114	0.638	0.979	0.343596	1.18221	0.140382	0.00561528
28	1.617	0.921	1.392	2.69	12.7	20.5359	2.47749	18.0584	0.005	0.090292		1.617	0.921	1.392	22.9	4.68	21.0909	7.56756	13.5233	0.005	0.0676167		1.617	0.921	1.392	0.114	0.638	1.392	0.184338	0.587598	0.98874	0.0395496
29	1.577	0.828	1.399	2.69	12.7	20.0279	2.22732	17.8006	0.005	0.0890029		1.577	0.828	1.399	22.9	4.68	18.9612	7.38036	11.5808	0.005	0.0579042		1.577	0.828	1.399	0.114	0.638	1.399	0.179778	0.528264	1.05051	0.0420206
30	1.521	0.931	1.395	2.69	12.7	19.3167	2.50439	16.8123	0.005	0.0840615		1.521	0.931	1.395	22.9	4.68	21.3199	7.11828	14.2016	0.005	0.0710081		1.521	0.931	1.395	0.114	0.638	1.395	0.173394	0.593978	0.974416	0.0389766
31	1.778	0.856	0.979	2.69	12.7	22.5806	2.30264	20.278	0.005	0.10139		1.778	0.856	0.979	22.9	4.68	19.6024	8.32104	11.2814	0.005	0.0564068		1.778	0.856	0.979	0.114	0.638	0.979	0.202692	0.546128	0.635564	0.0254226
32	1.797	0.874	0.974	2.69	12.7	22.8219	2.35106	20.4708	0.005	0.102354		1.797	0.874	0.974	22.9	4.68	20.0146	8.40996	11.6046	0.005	0.0580232		1.797	0.874	0.974	0.114	0.638	0.974	0.204858	0.557612	0.621246	0.0248498
33	0.998	0.873	0.457	2.69	12.7	12.6746	2.34837	10.3262	0.005	0.0516311		0.998	0.873	0.457	22.9	4.68	19.9917	4.67064	15.3211	0.005	0.0766053		0.998	0.873	0.457	0.114	0.638	0.457	0.113772	0.556974	0.013798	0.00055192
34	1.978	0.956	0.779	2.69	12.7	25.1206	2.57164	22.549	0.005	0.112745		1.978	0.956	0.779	22.9	4.68	21.8924	9.25704	12.6354	0.005	0.0631768		1.978	0.956	0.779	0.114	0.638	0.779	0.225492	0.609928	0.394564	0.0157826
35	1.997	0.974	0.774	2.69	12.7	25.3619	2.62006	22.7418	0.005	0.113709		1.997	0.974	0.774	22.9	4.68	22.3046	9.34596	12.9586	0.005	0.0647932		1.997	0.974	0.774	0.114	0.638	0.774	0.227658	0.621412	0.380246	0.0152098
36	1.998	0.973	0.857	2.69	12.7	25.3746	2.61737	22.7572	0.005	0.113786		1.998	0.973	0.857	22.9	4.68	22.2817	9.35064	12.9311	0.005	0.0646553		1.998	0.973	0.857	0.114	0.638	0.857	0.227772	0.620774	0.463998	0.0185599
37	0	0	0	2.69	12.7	0	0	0	0.005	0		0	0	0	22.9	4.68	0	0	0	0.005	0		0	0	0	0.114	0.638	0	0	0	0	0
38	0	0	0	2.69	12.7	0	0	0	0.005	0		0	0	0	22.9	4.68	0	0	0	0.005	0		0	0	0	0.114	0.638	0	0	0	0	0
39	0	0	0	2.69	12.7	0	0	0	0.005	0		0	0	0	22.9	4.68	0	0	0	0.005	0		0	0	0	0.114	0.638	0	0	0	0	0
40	0	0	0	2.69	12.7	0	0	0	0.005	0		0	0	0	22.9	4.68	0	0	0	0.005	0		0	0	0	0.114	0.638	0	0	0	0	0
41	0	0	0	2.69	12.7	0	0	0	0.005	0		0	0	0	22.9	4.68	0	0	0	0.005	0		0	0	0	0.114	0.638	0	0	0	0	0
42	0	0	0	2.69	12.7	0	0	0	0.005	0		0	0	0	22.9	4.68	0	0	0	0.005	0		0	0	0	0.114	0.638	0	0	0	0	0
43	0	0	0	2.69	12.7	0	0	0	0.005	0		0	0	0	22.9	4.68	0	0	0	0.005	0		0	0	0	0.114	0.638	0	0	0	0	0
44	0	0	0	2.69	12.7	0	0	0	0.005	0		0	0	0	22.9	4.68	0	0	0	0.005	0		0	0	0	0.114	0.638	0	0	0	0	0
45	0	0	0	2.69	12.7	0	0	0	0.005	0		0	0	0	22.9	4.68	0	0	0	0.005	0		0	0	0	0.114	0.638	0	0	0	0	0
46	0	0	0	2.69	12.7	0	0	0	0.005	0		0	0	0	22.9	4.68	0	0	0	0.005	0		0	0	0	0.114	0.638	0	0	0	0	0
47	0	0	0	2.69	12.7	0	0	0	0.005	0		0	0	0	22.9	4.68	0	0	0	0.005	0		0	0	0	0.114	0.638	0	0	0	0	0
48	0	0	0	2.69	12.7	0	0	0	0.005	0		0	0	0	22.9	4.68	0	0	0	0.005	0		0	0	0	0.114	0.638	0	0	0	0	0
49	0	0	0	2.69	12.7	0	0	0	0.005	0		0	0	0	22.9	4.68	0	0	0	0.005	0		0	0	0	0.114	0.638	0	0	0	0	0
50	0	0	0	2.69	12.7	0	0	0	0.005	0		0	0	0	22.9	4.68	0	0	0	0.005	0		0	0	0	0.114	0.638	0	0	0	0	0
51	0	0	0	2.69	12.7	0	0	0	0.005	0		0	0	0	22.9	4.68	0	0	0	0.005	0		0	0	0	0.114	0.638	0	0	0	0	0
52	0	0	0	2.69	12.7	0	0	0	0.005	0		0	0	0	22.9	4.68	0	0	0	0.005	0		0	0	0	0.114	0.638	0	0	0	0	0
53	0	0	0	2.69	12.7	0	0	0	0.005	0		0	0	0	22.9	4.68	0	0	0	0.005	0		0	0	0	0.114	0.638	0	0	0	0	0
54	0	0	0	2.69	12.7	0	0	0	0.005	0		0	0	0	22.9	4.68	0	0	0	0.005	0		0	0	0	0.114	0.638	0	0	0	0	0
55	0	0	0	2.69	12.7	0	0	0	0.005	0		0	0	0	22.9	4.68	0	0	0	0.005	0		0	0	0	0.114	0.638	0	0	0	0	0
56	0	0	0	2.69	12.7	0	0	0	0.005	0		0	0	0	22.9	4.68	0	0	0	0.005	0		0	0	0	0.114	0.638	0	0	0	0	0
57	0	0	0	2.69	12.7	0	0	0	0.005	0		0	0	0	22.9	4.68	0	0	0	0.005	0		0	0	0	0.114	0.638	0	0	0	0	0
58	0	0	0	2.69	12.7	0	0	0	0.005	0		0	0	0	22.9	4.68	0	0	0	0.005	0		0	0	0	0.114	0.638	0	0	0	0	0
59	0	0	0	2.69	12.7	0	0	0	0.005	0		0	0	0	22.9	4.68	0	0	0	0.005	0		0	0	0	0.114	0.638	0	0	0	0	0
60	0	0	0	2.69	12.7	0	0	0	0.005	0		0	0	0	22.9	4.68	0	0	0	0.005	0		0	0	0	0.114	0.638	0	0	0	0	0

## Sheet: Sheet2
		Chlorophyll a
						Borlaug2015 V1							Zincol2015 V2
1	control v1	0.187627
2		0.116551				JA			JA+APHID						JA			JA+APHID
3		0.163378			CONTROL	0.1mM JA	1mM JA	Aphid	0.1mM+aphid	1mM+aphid				CONTROL	0.1mM JA	1mM JA	Aphid	0.1mM+aphid	1mM+aphid
4	0.1mM JA	0.193423		R1	0.187627	0.193423	0.20385	0.0831591	0.0812193	0.0932969			R1	0.193843	0.193423	0.179929	0.090292	0.10139	0.112745
5		0.179594		R2	0.116551	0.179594	0.206616	0.0811975	0.0688966	0.099959			R2	0.122498	0.163246	0.175135	0.0890029	0.102354	0.113709
6		0.163922		R3	0.163378	0.163922	0.171471	0.0886898	0.0795193	0.0914791			R3	0.163303	0.143689	0.166466	0.0840615	0.0516311	0.113786
7	1mM JA	0.20385		AVERAGE	0.155852	0.17898	0.193979	0.0843488	0.0765451	0.0949117			AVERAGE	0.159881	0.166786	0.173844	0.0877855	0.085125	0.113413
8		0.206616		SD	0.0361307	0.0147599	0.0195415	0.00388527	0.00667811	0.00446463			SD	0.0357954	0.0250549	0.00682386	0.00328882	0.0290106	0.000580287
9		0.171471		SE	0.0208607	0.00852188	0.0112826	0.00224323	0.00385572	0.00257773			SE	0.0206671	0.0144659	0.00393987	0.00189886	0.0167498	0.000335039
10	Aphid	0.0831591
11		0.0811975
12		0.0886898			Borlaug-2015	Zincol-2015
13	0.1mM+aphid	0.0812193		Control	0.155852	0.159881
14		0.0688966		0.1 mM JA	0.17898	0.178786
15		0.0795193		1 mM JA	0.195979	0.200436
16	1mMJA+aphid	0.0932969		Aphid	0.100349	0.110785
17		0.099959		0.1 mM + aphid	0.134505	0.137913
18		0.0914791		1 mM JA + aphid	0.138168	0.145833
19	control v2	0.193843
20		0.122498
21		0.163303
22	0.1mM JA	0.193423
23		0.163246
24		0.143689
25	1mM JA	0.179929
26		0.175135
27		0.166466
28	Aphid	0.090292
29		0.0890029
30		0.0840615
31	0.1mM+aphid	0.10139
32		0.102354
33		0.0516311
34	1mMJA+aphid	0.112745
35		0.113709
36		0.113786

## Sheet: Sheet3
		Chlorophyll b
						Borlaug2015 V1							Zincol2015 V2
1	control v1	0.144578
2		0.169894				JA			JA+APHID						JA			JA+APHID
3		0.146722			CONTROL	0.1mM JA	1mM JA	Aphid	0.1mM+aphid	1mM+aphid				CONTROL	0.1mM JA	1mM JA	Aphid	0.1mM+aphid	1mM+aphid
4	0.1mM JA	0.141785		R1	0.144578	0.141785	0.156456	0.0714502	0.0605534	0.0616895			R1	0.143383	0.141785	0.153221	0.0676167	0.0564068	0.0631768
5		0.150387		R2	0.169894	0.150387	0.142729	0.0674627	0.0656421	0.0618635			R2	0.170989	0.136474	0.152139	0.0579042	0.0580232	0.0647932
6		0.152437		R3	0.146722	0.152437	0.150751	0.0610868	0.0776114	0.0663029			R3	0.157704	0.163837	0.141641	0.0710081	0.0766053	0.0646553
7	1mM JA	0.156456		AVERAGE	0.153731	0.148203	0.149979	0.0666666	0.0679356	0.0632853			AVERAGE	0.157359	0.147365	0.149	0.0655097	0.0636784	0.0642084
8		0.142729		SD	0.0140379	0.00565176	0.00689581	0.00522737	0.00875723	0.00261477			SD	0.0138059	0.0145097	0.00639633	0.0068013	0.0112241	0.000896077
9		0.150751		SE	0.00810504	0.00326314	0.00398141	0.00301811	0.00505614	0.00150968			SE	0.0079711	0.00837741	0.00369303	0.00392685	0.00648044	0.000517366
10	Aphid	0.0714502
11		0.0674627
12		0.0610868			Borlaug-2015	Zincol-2015
13	0.1mM+aphid	0.0605534		Control	0.123731	0.127359
14		0.0656421		0.1 mM JA	0.137203	0.138365
15		0.0776114		1 mM JA	0.140333	0.141
16	1mMJA+aphid	0.0616895		Aphid	0.0766666	0.0825097
17		0.0618635		0.1 mM + aphid	0.0849356	0.0933333
18		0.0663029		1 mM JA + aphid	0.0912853	0.0953333
19	control v2	0.143383
20		0.170989
21		0.157704
22	0.1mM JA	0.141785
23		0.136474
24		0.163837
25	1mM JA	0.153221
26		0.152139
27		0.141641
28	Aphid	0.0676167
29		0.0579042
30		0.0710081
31	0.1mM+aphid	0.0564068
32		0.0580232
33		0.0766053
34	1mMJA+aphid	0.0631768
35		0.0647932
36		0.0646553

## Sheet: Sheet4
			Carotenoids
						Borlaug2015 V1							Zincol2015 V2
1	control v1	0.0636486
2		0.040021				JA			JA+APHID						JA			JA+APHID
3		0.0046696			CONTROL	0.1mM JA	1mM JA	Aphid	0.1mM+aphid	1mM+aphid				CONTROL	0.1mM JA	1mM JA	Aphid	0.1mM+aphid	1mM+aphid
4	0.1mM JA	0.0637721		R1	0.0636486	0.0637721	0.0643712	0.00940728	0.0222307	0.0224458			R1	0.0634494	0.0637721	0.0493544	0.0395496	0.0254226	0.0157826
5		0.0440333		R2	0.040021	0.0440333	0.0502582	0.00844224	0.022583	0.0220949			R2	0.0381114	0.0830082	0.0496886	0.0420206	0.0248498	0.0152098
6		0.00242272		R3	0.0046696	0.00242272	0.00311928	0.0124706	0.0204255	0.0231113			R3	0.0026088	0.0706058	0.00561528	0.0389766	0.00055192	0.0185599
7	1mM JA	0.0643712		AVERAGE	0.036113	0.0367427	0.0392495	0.0101067	0.0217464	0.0225506			AVERAGE	0.0347232	0.072462	0.0348861	0.0401823	0.0169414	0.0165174
8		0.0502582		SD	0.029683	0.0313177	0.0320756	0.00210327	0.00115742	0.000516253			SD	0.0305615	0.00975145	0.0253498	0.00161758	0.0141966	0.00179187
9		0.00311928		SE	0.017138	0.0180818	0.0185194	0.00121436	0.000668258	0.000298068			SE	0.0176452	0.00563017	0.0146361	0.000933937	0.00819667	0.00103457
10	Aphid	0.00940728
11		0.00844224
12		0.0124706			Borlaug-2015	Zincol-2015
13	0.1mM+aphid	0.0222307		Control	0.036113	0.0347232
14		0.022583		0.1 mM JA	0.0467427	0.062462
15		0.0204255		1 mM JA	0.0392495	0.0348861
16	1mMJA+aphid	0.0224458		Aphid	0.0101067	0.0201823
17		0.0220949		0.1 mM + aphid	0.0217464	0.0169414
18		0.0231113		1 mM JA + aphid	0.0225506	0.0165174
19	control v2	0.0634494
20		0.0381114
21		0.0026088
22	0.1mM JA	0.0637721
23		0.0830082
24		0.0706058
25	1mM JA	0.0493544
26		0.0496886
27		0.00561528
28	Aphid	0.0395496
29		0.0420206
30		0.0389766
31	0.1mM+aphid	0.0254226
32		0.0248498
33		0.00055192
34	1mMJA+aphid	0.0157826
35		0.0152098
36		0.0185599

## Sheet: Sheet5
Total chlorophyll
								Borlaug2015 V1							Zincol2015 V2
		CHL A	CHL B	Total chlorophyll content
1	control v1	0.187627	0.144578	0.332205				JA			JA+APHID						JA			JA+APHID
2		0.116551	0.169894	0.286445			CONTROL	0.1mM JA	1mM JA	Aphid	0.1mM+aphid	1mM+aphid				CONTROL	0.1mM JA	1mM JA	Aphid	0.1mM+aphid	1mM+aphid
3		0.163378	0.146722	0.310101		R1	0.332205	0.335208	0.360305	0.154609	0.141773	0.154986			R1	0.337226	0.335208	0.33315	0.157909	0.157797	0.175922
4	0.1mM JA	0.193423	0.141785	0.335208		R2	0.286445	0.329981	0.349346	0.14866	0.134539	0.161823			R2	0.293486	0.29972	0.327275	0.146907	0.160377	0.178502
5		0.179594	0.150387	0.329981		R3	0.310101	0.316359	0.322222	0.149777	0.157131	0.157782			R3	0.321008	0.307526	0.308107	0.15507	0.128236	0.178441
6		0.163922	0.152437	0.316359		AVERAGE	0.309584	0.327183	0.343958	0.151015	0.144481	0.158197			AVERAGE	0.31724	0.314151	0.322844	0.153295	0.148803	0.177622
7	1mM JA	0.20385	0.156456	0.360305		SD	0.0228846	0.0097308	0.0196051	0.00316212	0.0115369	0.00343694			SD	0.0221118	0.0186487	0.0130962	0.00571145	0.0178583	0.00147275
8		0.206616	0.142729	0.349346		SE	0.0132128	0.00561824	0.0113193	0.0018257	0.00666103	0.00198437			SE	0.0127666	0.0107671	0.00756132	0.0032976	0.0103108	0.000850315
9		0.171471	0.150751	0.322222
10	Aphid	0.0831591	0.0714502	0.154609				Borlaug-2015	Zincol-2015
11		0.0811975	0.0674627	0.14866			Control	0.299584	0.301333
12		0.0886898	0.0610868	0.149777			0.1 mM JA	0.311683	0.324151
13	0.1mM+aphid	0.0812193	0.0605534	0.141773			1 mM JA	0.343958	0.348439
14		0.0688966	0.0656421	0.134539			Aphid	0.171015	0.183295
15		0.0795193	0.0776114	0.157131			0.1 mM + aphid	0.194481	0.199903
16	1mMJA+aphid	0.0932969	0.0616895	0.154986			1 mM JA + aphid	0.203197	0.215763
17		0.099959	0.0618635	0.161823
18		0.0914791	0.0663029	0.157782
19	control v2	0.193843	0.143383	0.337226
20		0.122498	0.170989	0.293486
21		0.163303	0.157704	0.321008
22	0.1mM JA	0.193423	0.141785	0.335208
23		0.163246	0.136474	0.29972
24		0.143689	0.163837	0.307526
25	1mM JA	0.179929	0.153221	0.33315
26		0.175135	0.152139	0.327275
27		0.166466	0.141641	0.308107
28	Aphid	0.090292	0.0676167	0.157909
29		0.0890029	0.0579042	0.146907
30		0.0840615	0.0710081	0.15507
31	0.1mM+aphid	0.10139	0.0564068	0.157797
32		0.102354	0.0580232	0.160377
33		0.0516311	0.0766053	0.128236
34	1mMJA+aphid	0.112745	0.0631768	0.175922
35		0.113709	0.0647932	0.178502
36		0.113786	0.0646553	0.178441
