# Supplementary material for: Exploring the effect of Jasmonic Acid for Aphids control for improving the yield of Triticum aestivum varieties
Source: PeerJ. 2022 Oct 27;10:e14018. doi: 10.7717/peerj.14018 (PMC9618260; doi:10.7717/peerj.14018)
Supplement: Supplemental Information 3 [file peerj-10-14018-s003.xlsx]

## Sheet: ist
		SOD	50ul sample used				??	sample Vol
		SOD	Blank	Blank-sample	%age inhabition	con(ug/5ulsample)	ug pro in reaction		Units/mg pro
1	control	0.549	0.596	0.047	3.80875	22.0392	220.392	2893.23	0.345635
2		0.491	0.596	0.105	85.0891	22.2866	222.866	130.961	7.63589
3		0.58	0.596	0.016	12.966	21.6433	216.433	834.618	1.19815
4				0	0	-2.0132	-20.132	#DIV/0!	#DIV/0!
5	JA o.1mM	0.569	0.596	0.027	21.8801	21.0494	210.494	481.017	2.07893
6		0.437	0.596	0.159	128.849	21.4948	214.948	83.4106	11.9889
7		0.463	0.596	0.133	107.78	22.2866	222.866	103.39	9.67213
8				0	0	-2.0132	-20.132	#DIV/0!	#DIV/0!
9	1mM	0.509	0.596	0.087	70.5024	22.1877	221.877	157.354	6.3551
10		0.263	0.596	0.333	269.854	21.0989	210.989	39.0931	25.58
11		0.294	0.596	0.302	244.733	22.3856	223.856	45.7349	21.8652
12				0	0	-2.0132	-20.132	#DIV/0!	#DIV/0!
13	Aphids	0.209	0.596	0.387	313.614	22.831	228.31	36.3999	27.4726
14		0.311	0.596	0.285	230.956	22.2866	222.866	48.2486	20.726
15		0.372	0.596	0.224	181.524	22.4351	224.351	61.7967	16.1821
16				0	0	-2.0132	-20.132	#DIV/0!	#DIV/0!
17	aphid+0.1mM	0.462	0.528	0.066	53.4846	21.6927	216.927	202.794	4.9311
18		0.411	0.528	0.117	94.8136	20.9999	209.999	110.743	9.02992
19		0.413	0.528	0.115	93.1929	25.751	257.51	138.16	7.23801
20				0	0	-2.0132	-20.132	#DIV/0!	#DIV/0!
21	aphid+1mM	0.468	0.628	0.16	129.66	27.6316	276.316	106.554	9.38488
22		0.403	0.628	0.225	182.334	21.0989	210.989	57.8578	17.2838
23		0.334	0.628	0.294	238.25	25.7015	257.015	53.9381	18.5398
24				0	0	-2.0132	-20.132	#DIV/0!	#DIV/0!
25	control	0.288	0.484	0.196	158.833	22.5836	225.836	71.0922	14.0662
26		0.294	0.484	0.19	153.971	20.604	206.04	66.9086	14.9458
27		0.255	0.484	0.229	185.575	20.208	202.08	54.447	18.3665
29	0.1mM	0.363	0.484	0.121	98.0551	20.8019	208.019	106.073	9.42751
30		0.324	0.484	0.16	129.66	20.0101	200.101	77.1638	12.9594
31		0.32	0.484	0.164	132.901	20.7029	207.029	77.8885	12.8389
32				0	0	-2.0132	-20.132	#DIV/0!	#DIV/0!
33	1mM	0.278	0.595	0.317	256.888	20.2575	202.575	39.4287	25.3622
34		0.212	0.595	0.383	310.373	20.4555	204.555	32.9531	30.3462
35		0.318	0.595	0.277	224.473	20.208	202.08	45.0121	22.2162
36	aphids	0.215	0.596	0.381	308.752	22.831	228.31	36.9731	27.0467
37		0.306	0.596	0.29	235.008	22.2866	222.866	47.4167	21.0896
38		0.314	0.596	0.282	228.525	22.4351	224.351	49.0867	20.3721
39	aphid+0.1mM	0.472	0.595	0.123	99.6759	20.0596	200.596	100.624	9.93799
40		0.443	0.595	0.152	123.177	20.0101	200.101	81.2251	12.3115
41		0.411	0.595	0.184	149.109	21.7917	217.917	73.0734	13.6849
42				0	0	-2.0132	-20.132	#DIV/0!	#DIV/0!
43	aphid+1mM	0.482	0.595	0.113	91.5721	20.208	202.08	110.339	9.06294
44		0.518	0.595	0.077	62.3987	21.3958	213.958	171.444	5.8328
45		0.422	0.595	0.173	140.194	20.604	206.04	73.4835	13.6085

## Sheet: 2nd
		SOD	50ul sample used				??	sample Vol
		SOD	Blank	Blank-sample	%age inhabition	con(ug/5ulsample)	ug pro in reaction		Units/mg pro
1	control	0.541	0.596	0.055	4.45705	22.0392	220.392	2472.4	0.404466
2		0.481	0.596	0.115	93.1929	22.2866	222.866	119.573	8.36312
3		0.576	0.596	0.02	16.2075	21.6433	216.433	667.695	1.49769
5	JA o.1mM	0.569	0.596	0.027	21.8801	21.0494	210.494	481.017	2.07893
6		0.532	0.596	0.064	51.8639	21.4948	214.948	207.223	4.82571
7		0.539	0.596	0.057	46.1912	22.2866	222.866	241.243	4.1452
9	1mM	0.542	0.596	0.054	43.7601	22.1877	221.877	253.514	3.94455
10		0.463	0.596	0.133	107.78	21.0989	210.989	97.8797	10.2166
11		0.569	0.596	0.027	21.8801	22.3856	223.856	511.553	1.95483
13	Aphids	0.209	0.596	0.387	313.614	22.831	228.31	36.3999	27.4726
14		0.244	0.596	0.352	285.251	22.2866	222.866	39.0649	25.5984
15		0.272	0.596	0.324	262.561	22.4351	224.351	42.7236	23.4062
17	aphid+0.1mM	0.426	0.528	0.102	82.658	21.6927	216.927	131.22	7.6208
18		0.418	0.528	0.11	89.141	20.9999	209.999	117.79	8.48967
19		0.413	0.528	0.115	93.1929	25.751	257.51	138.16	7.23801
21	aphid+1mM	0.368	0.628	0.26	210.697	27.6316	276.316	65.5719	15.2504
22		0.503	0.628	0.125	101.297	21.0989	210.989	104.144	9.60209
23		0.534	0.628	0.094	76.175	25.7015	257.015	168.7	5.92768
25	control	0.448	0.484	0.036	29.1734	22.5836	225.836	387.057	2.5836
26		0.476	0.484	0.008	6.48298	20.604	206.04	1589.08	0.629295
27		0.432	0.484	0.052	42.1394	20.208	202.08	239.776	4.17056
29	0.1mM	0.363	0.484	0.121	98.0551	20.8019	208.019	106.073	9.42751
30		0.424	0.484	0.06	48.6224	20.0101	200.101	205.77	4.85979
31		0.32	0.484	0.164	132.901	20.7029	207.029	77.8885	12.8389
33	1mM	0.478	0.595	0.117	94.8136	20.2575	202.575	106.828	9.36083
34		0.512	0.595	0.083	67.2609	20.4555	204.555	152.061	6.57632
35		0.518	0.595	0.077	62.3987	20.208	202.08	161.927	6.17563
36	Aphids	0.201	0.596	0.395	320.097	22.831	228.31	35.6626	28.0405
37		0.322	0.596	0.274	222.042	22.2866	222.866	50.1856	19.926
38		0.345	0.596	0.251	203.404	22.4351	224.351	55.1492	18.1326
39	aphid+0.1mM	0.472	0.595	0.123	99.6759	20.0596	200.596	100.624	9.93799
40		0.443	0.595	0.152	123.177	20.0101	200.101	81.2251	12.3115
41		0.411	0.595	0.184	149.109	21.7917	217.917	73.0734	13.6849
43	aphid+1mM	0.482	0.595	0.113	91.5721	20.208	202.08	110.339	9.06294
44		0.518	0.595	0.077	62.3987	21.3958	213.958	171.444	5.8328
45		0.422	0.595	0.173	140.194	20.604	206.04	73.4835	13.6085

## Sheet: 3rd
		SOD	50ul sample used				??	sample Vol
		SOD	Blank	Blank-sample	%age inhabition	con(ug/5ulsample)	ug pro in reaction		Units/mg pro
1	control	0.536	0.596	0.06	4.86224	22.0392	220.392	2266.36	0.441236
2		0.461	0.596	0.135	109.4	22.2866	222.866	101.858	9.81757
3		0.581	0.596	0.015	12.1556	21.6433	216.433	890.259	1.12327
5	JA o.1mM	0.571	0.596	0.025	20.2593	21.0494	210.494	519.499	1.92493
6		0.534	0.596	0.062	50.2431	21.4948	214.948	213.908	4.67491
7		0.544	0.596	0.052	42.1394	22.2866	222.866	264.44	3.78158
9	1mM	0.532	0.596	0.064	51.8639	22.1877	221.877	213.903	4.67502
10		0.522	0.596	0.074	59.9676	21.0989	210.989	175.919	5.68444
11		0.569	0.596	0.027	21.8801	22.3856	223.856	511.553	1.95483
13	Aphids	0.204	0.596	0.392	317.666	22.831	228.31	35.9356	27.8276
14		0.232	0.596	0.364	294.976	22.2866	222.866	37.7771	26.4711
15		0.228	0.596	0.368	298.217	22.4351	224.351	37.6154	26.5849
17	aphid+0.1mM	0.418	0.528	0.11	89.141	21.6927	216.927	121.677	8.21851
18		0.409	0.528	0.119	96.4344	20.9999	209.999	108.882	9.18428
19		0.413	0.528	0.115	93.1929	25.751	257.51	138.16	7.23801
21	aphid+1mM	0.468	0.628	0.16	129.66	27.6316	276.316	106.554	9.38488
22		0.498	0.628	0.13	105.348	21.0989	210.989	100.138	9.98617
23		0.509	0.628	0.119	96.4344	25.7015	257.015	133.259	7.50419
25	control	0.434	0.484	0.05	40.5186	22.5836	225.836	278.681	3.58833
26		0.399	0.484	0.085	68.8817	20.604	206.04	149.56	6.68626
27		0.424	0.484	0.06	48.6224	20.208	202.08	207.806	4.81218
29	0.1mM	0.367	0.484	0.117	94.8136	20.8019	208.019	109.699	9.11585
30		0.409	0.484	0.075	60.778	20.0101	200.101	164.616	6.07474
31		0.386	0.484	0.098	79.4165	20.7029	207.029	130.344	7.67201
33	1mM	0.464	0.595	0.131	106.159	20.2575	202.575	95.4114	10.4809
34		0.511	0.595	0.084	68.0713	20.4555	204.555	150.25	6.65556
35		0.521	0.595	0.074	59.9676	20.208	202.08	168.491	5.93502
36	Aphids	0.198	0.596	0.398	322.528	22.831	228.31	35.3938	28.2535
37		0.342	0.596	0.254	205.835	22.2866	222.866	54.1372	18.4716
38		0.362	0.596	0.234	189.627	22.4351	224.351	59.1558	16.9045
39	aphid+0.1mM	0.472	0.595	0.123	99.6759	20.0596	200.596	100.624	9.93799
40		0.443	0.595	0.152	123.177	20.0101	200.101	81.2251	12.3115
41		0.411	0.595	0.184	149.109	21.7917	217.917	73.0734	13.6849
43	aphid+1mM	0.482	0.595	0.113	91.5721	20.208	202.08	110.339	9.06294
44		0.518	0.595	0.077	62.3987	21.3958	213.958	171.444	5.8328
45		0.422	0.595	0.173	140.194	20.604	206.04	73.4835	13.6085
46

## Sheet: 4th
		SOD	50ul sample used				??	sample Vol
		SOD	Blank	Blank-sample	%age inhabition	con(ug/5ulsample)	ug pro in reaction		Units/mg pro
1	control	0.456	0.596	0.14	11.3452	22.0392	220.392	971.298	1.02955
2		0.509	0.596	0.087	70.5024	22.2866	222.866	158.056	6.32688
3		0.567	0.596	0.029	23.5008	21.6433	216.433	460.479	2.17165
5	JA o.1mM	0.57	0.596	0.026	21.0697	21.0494	210.494	499.518	2.00193
6		0.534	0.596	0.062	50.2431	21.4948	214.948	213.908	4.67491
7		0.545	0.596	0.051	41.329	22.2866	222.866	269.625	3.70886
9	1mM	0.549	0.596	0.047	38.0875	22.1877	221.877	291.272	3.43322
10		0.571	0.596	0.025	20.2593	21.0989	210.989	520.72	1.92042
11		0.573	0.596	0.023	18.6386	22.3856	223.856	600.518	1.66523
13	Aphids	0.214	0.596	0.382	309.562	22.831	228.31	36.8763	27.1177
14		0.231	0.596	0.365	295.786	22.2866	222.866	37.6736	26.5438
15		0.232	0.596	0.364	294.976	22.4351	224.351	38.0287	26.2959
17	aphid+0.1mM	0.404	0.528	0.124	100.486	21.6927	216.927	107.939	9.2645
18		0.397	0.528	0.131	106.159	20.9999	209.999	98.9078	10.1104
19		0.403	0.528	0.125	101.297	25.751	257.51	127.107	7.8674
21	aphid+1mM	0.497	0.628	0.131	106.159	27.6316	276.316	130.143	7.68387
22		0.511	0.628	0.117	94.8136	21.0989	210.989	111.265	8.98756
23		0.523	0.628	0.105	85.0891	25.7015	257.015	151.027	6.62134
25	control	0.445	0.484	0.039	31.6045	22.5836	225.836	357.284	2.7989
26		0.402	0.484	0.082	66.4506	20.604	206.04	155.032	6.45027
27		0.451	0.484	0.033	26.7423	20.208	202.08	377.829	2.6467
29	0.1mM	0.367	0.484	0.117	94.8136	20.8019	208.019	109.699	9.11585
30		0.409	0.484	0.075	60.778	20.0101	200.101	164.616	6.07474
31		0.386	0.484	0.098	79.4165	20.7029	207.029	130.344	7.67201
33	1mM	0.498	0.595	0.097	78.6062	20.2575	202.575	128.855	7.76069
34		0.519	0.595	0.076	61.5883	20.4555	204.555	166.066	6.02169
35		0.534	0.595	0.061	49.4327	20.208	202.08	204.399	4.89238
36	Aphids	0.199	0.596	0.397	321.718	22.831	228.31	35.483	28.1825
37		0.351	0.596	0.245	198.541	22.2866	222.866	56.1259	17.8171
38		0.399	0.596	0.197	159.643	22.4351	224.351	70.2663	14.2316
39	aphid+0.1mM	0.478	0.595	0.117	94.8136	20.0596	200.596	105.784	9.45321
40		0.443	0.595	0.152	123.177	20.0101	200.101	81.2251	12.3115
41		0.434	0.595	0.161	130.47	21.7917	217.917	83.5124	11.9743
43	aphid+1mM	0.484	0.595	0.111	89.9514	20.208	202.08	112.328	8.90254
44		0.513	0.595	0.082	66.4506	21.3958	213.958	160.99	6.21155
45		0.418	0.595	0.177	143.436	20.604	206.04	71.8228	13.9231
46

## Sheet: sod mean 1
		SOD	mean	SD	SE
1	control	0.345635	3.05989	3.98579	2.30126				Borlaug-2015	Zincol-2015
2		7.63589						Control	3.05989	15.7928
3		1.19815						0.1 Mm JA	7.91331	11.7419
4	JA o.1mM	2.07893	7.91331	5.18381	2.99296		Mean	1 mM JA	17.9334	25.9749
5		11.9889						Aphid	21.4602	22.8361
6		9.67213						0.1 mM + aphid	7.06634	11.9781
7	1mM	6.3551	17.9334	10.1977	5.88781			1 mM JA + aphid	15.0695	9.50141
8		25.58
9		21.8652
10	Aphids	27.4726	21.4602	5.68097	3.28001			Control	2.30126	1.31168
11		20.726						0.1 Mm JA	2.99296	1.15777
12		16.1821					SE	1 mM JA	5.88781	2.36688
13	aphid+0.1mM	4.9311	7.06634	2.05479	1.18637			Aphid	3.28001	2.11551
14		9.02992						0.1 mM + aphid	1.18637	1.09443
15		7.23801						1 mM JA + aphid	2.86541	2.2554
16	aphid+1mM	9.38488	15.0695	4.96289	2.86541
17		17.2838
18		18.5398
19	control	14.0662	15.7928	2.27183	1.31168
20		14.9458
21		18.3665
22	0.1mM	9.42751	11.7419	2.00526	1.15777
23		12.9594
24		12.8389
25	1mM	25.3622	25.9749	4.09944	2.36688
26		30.3462
27		22.2162
29	aphids	27.0467	22.8361	3.66406	2.11551
30		21.0896
31		20.3721
32	aphid+0.1mM	9.93799	11.9781	1.89556	1.09443
33		12.3115
34		13.6849
35	aphid+1mM	9.06294	9.50141	3.90635	2.2554
36		5.8328
37		13.6085
38
39
40
41
42
43
44
45

## Sheet: sod mean2
		SODUnits/mg pro	mean	SD	SE
1	control	0.404466	3.42176	4.31411	2.49083				Borlaug-2015	Zincol-2015
2		8.36312						Control	3.42176	2.46115
3		1.49769						0.1 Mm JA	3.68328	9.04205
4	JA o.1mM	2.07893	3.68328	1.43047	0.825905		Mean	1 mM JA	5.372	7.37093
5		4.82571						Aphid	25.4924	22.0331
6		4.1452						0.1 mM + aphid	7.78282	11.9781
7	1mM	3.94455	5.372	4.3119	2.48955			1 mM JA + aphid	10.2601	9.50141
8		10.2166
9		1.95483
10	Aphids	27.4726	25.4924	2.03527	1.1751			Control	2.49083	1.02414
11		25.5984						0.1 Mm JA	0.825905	2.31148
12		23.4062					SE	1 mM JA	2.48955	1.00168
13	aphid+0.1mM	7.6208	7.78282	0.641367	0.370304			Aphid	1.1751	3.04812
14		8.48967						0.1 mM + aphid	0.370304	1.09443
15		7.23801						1 mM JA + aphid	2.71136	2.2554
16	aphid+1mM	15.2504	10.2601	4.69607	2.71136
17		9.60209
18		5.92768
19	control	2.5836	2.46115	1.7738	1.02414
20		0.629295
21		4.17056
22	0.1mM	9.42751	9.04205	4.00348	2.31148
23		4.85979
24		12.8389
25	1mM	9.36083	7.37093	1.73491	1.00168
26		6.57632
27		6.17563
29	aphids	28.0405	22.0331	5.27934	3.04812
30		19.926
31		18.1326
32	aphid+0.1mM	9.93799	11.9781	1.89556	1.09443
33		12.3115
34		13.6849
35	aphid+1mM	9.06294	9.50141	3.90635	2.2554
36		5.8328
37		13.6085
38

## Sheet: sod mean 3
		Units/mg pro	mean	SD	SE
1	control	0.441236	3.79403	5.22768	3.01829
2		9.81757								Zincol-2015
3		1.12327						Control	3.79403	5.02892
4	JA o.1mM	1.92493	3.46048	1.40283	0.809947			0.1 Mm JA	3.46048	7.62086
5		4.67491					Mean	1 mM JA	4.10476	7.6905
6		3.78158						Aphid	26.9612	21.2099
7	1mM	4.67502	4.10476	1.92909	1.11379			0.1 mM + aphid	8.2136	11.9781
8		5.68444						1 mM JA + aphid	8.95841	9.50141
9		1.95483
10	Aphids	27.8276	26.9612	0.752479	0.434456
11		26.4711						Control	3.01829	0.900864
12		26.5849						0.1 Mm JA	0.809947	0.878293
13	aphid+0.1mM	8.21851	8.2136	0.973143	0.561861		SE	1 mM JA	1.11379	1.41067
14		9.18428						Aphid	0.434456	3.55086
15		7.23801						0.1 mM + aphid	0.561861	1.09443
16	aphid+1mM	9.38488	8.95841	1.29479	0.747567			1 mM JA + aphid	0.747567	2.2554
17		9.98617
18		7.50419
19	control	3.58833	5.02892	1.5603	0.900864
20		6.68626
21		4.81218
22	0.1mM	9.11585	7.62086	1.5212	0.878293
23		6.07474
24		7.67201
25	1mM	10.4809	7.6905	2.44329	1.41067
26		6.65556
27		5.93502
29	aphids	28.2535	21.2099	6.15009	3.55086
30		18.4716
31		16.9045
32	aphid+0.1mM	9.93799	11.9781	1.89556	1.09443
33		12.3115
34		13.6849
35	aphid+1mM	9.06294	9.50141	3.90635	2.2554
36		5.8328
37		13.6085
38

## Sheet: sod mean 4
		Units/mg pro	mean	SD	SE
1	control	1.02955	3.17603	2.78783	1.6096
2		6.32688							Borlaug-2015	Zincol-2015
3		2.17165						Control	6.17603	7.65289
4	JA o.1mM	2.00193	3.4619	1.35349	0.781464			0.1 mM JA	7.4619	7.98646
5		4.67491					Mean	1 mM JA	8.33962	9.22492
6		3.70886						Aphid	3.65247	5.07706
7	1mM	3.43322	2.33962	0.955639	0.551754			0.1 mM + aphid	13.0808	14.1463
8		1.92042						1 mM JA + aphid	14.1333	15.6766
9		1.66523
10	Aphids	27.1177	26.6525	0.421531	0.243378
11		26.5438						Control	1.6096	1.2433
12		26.2959						0.1 Mm JA	0.781464	0.878293
13	aphid+0.1mM	9.2645	9.08077	1.13274	0.654008		SE	1 mM JA	0.551754	0.834244
14		10.1104						Aphid	1.24338	0.893918
15		7.8674						0.1 mM + aphid	0.654008	0.901848
16	aphid+1mM	7.68387	7.76426	1.18515	0.684269			1 mM JA + aphid	0.684269	2.25982
17		8.98756
18		6.62134
19	control	2.7989	3.96529	2.1534	1.2433
20		6.45027
21		2.6467
22	0.1mM	9.11585	7.62086	1.5212	0.878293
23		6.07474
24		7.67201
25	1mM	7.76069	6.22492	1.44491	0.834244
26		6.02169
27		4.89238
29	aphids	28.1825	20.0771	7.24485	4.18294
30		17.8171
31		14.2316
32	aphid+0.1mM	9.45321	11.2463	1.562	0.901848
33		12.3115
34		11.9743
35	aphid+1mM	8.90254	9.67908	3.91401	2.25982
36		6.21155
37		13.9231
38
