# Supplementary material for: Exploring the effect of Jasmonic Acid for Aphids control for improving the yield of Triticum aestivum varieties
Source: PeerJ. 2022 Oct 27;10:e14018. doi: 10.7717/peerj.14018 (PMC9618260; doi:10.7717/peerj.14018)
Supplement: Supplemental Information 4 [file peerj-10-14018-s004.xlsx]

## Sheet: H2O2 1
Sr. No.	H2O2	conc.	μmol /g fwt
1	0.28	0.00812	0.0812		control v1				Borlaug2015 V1							Zincol2015 V2
2	0.19	0.00776	0.0776
3	0.2	0.0078	0.078						JA			JA+APHID						JA			JA+APHID
4	0.055	0.00722	0.0722		0.1mM JA			CONTROL	0.1mM JA	1mM JA	Aphid	0.1mM+aphid	1mM+aphid				CONTROL	0.1mM JA	1mM JA	Aphid	0.1mM+aphid	1mM+aphid
5	0.082	0.007328	0.07328				R1	0.0812	0.0722	0.07392	0.1622	0.1452	0.152			R1	0.08	0.07312	0.07328	0.15856	0.1412	0.15284
6	0.087	0.007348	0.07348				R2	0.0776	0.07328	0.07376	0.15688	0.1204	0.1532			R2	0.0784	0.0726	0.07376	0.15648	0.1216	0.14516
7	0.098	0.007392	0.07392		1mM JA		R3	0.078	0.07348	0.07356	0.14568	0.0792	0.1556			R3	0.0772	0.07348	0.07324	0.13916	0.0836	0.14324
8	0.094	0.007376	0.07376				AVERAGE	0.0789333	0.0729867	0.0737467	0.15492	0.114933	0.1536			AVERAGE	0.0785333	0.0730667	0.0734267	0.1514	0.115467	0.14708
9	0.089	0.007356	0.07356				SD	0.00197315	0.000688573	0.00018037	0.0084326	0.0333379	0.00183303			SD	0.00140475	0.000442418	0.000289367	0.010651	0.0292857	0.00507984
10	2.305	0.01622	0.1622		Aphid		SE	0.00113923	0.00039756	0.00010414	0.00486871	0.0192482	0.00105833			SE	0.000811059	0.000255437	0.000167071	0.00614957	0.0169086	0.00293293
11	2.172	0.015688	0.15688
12	1.892	0.014568	0.14568
13	1.88	0.01452	0.1452		0.1mM+aphid			Borlaug-2015	Zincol-2015
14	1.26	0.01204	0.1204				Control	0.0789333	0.0785333
15	0.23	0.00792	0.0792				0.1 Mm JA	0.0729867	0.0730667
16	2.05	0.0152	0.152		1mMJA+aphid		1 mM JA	0.0737467	0.0734267
17	2.08	0.01532	0.1532				Aphid	0.15492	0.1514
18	2.14	0.01556	0.1556				0.1 mM + aphid	0.114933	0.115467
19	0.25	0.008	0.08		control v2		1 mM JA + aphid	0.1536	0.14708
20	0.21	0.00784	0.0784
21	0.18	0.00772	0.0772
22	0.078	0.007312	0.07312		0.1mM JA		Control	0.00113923	0.000811059
23	0.065	0.00726	0.0726				0.1 Mm JA	0.00039756	0.000255437
24	0.087	0.007348	0.07348				1 mM JA	0.00010414	0.000167071
25	0.082	0.007328	0.07328		1mM JA		Aphid	0.00486871	0.00614957
26	0.094	0.007376	0.07376				0.1 mM + aphid	0.0192482	0.0169086
27	0.081	0.007324	0.07324				1 mM JA + aphid	0.00105833	0.00293293
28	2.214	0.015856	0.15856		Aphid
29	2.162	0.015648	0.15648
30	1.729	0.013916	0.13916
31	1.78	0.01412	0.1412		0.1mM+aphid
32	1.29	0.01216	0.1216
33	0.34	0.00836	0.0836
34	2.071	0.015284	0.15284		1mMJA+aphid
35	1.879	0.014516	0.14516
36	1.831	0.014324	0.14324
37	0	0.007	0.07
38	0	0.007	0.07
39	0	0.007	0.07
40	0	0.007	0.07
41	0	0.007	0.07
42	0	0.007	0.07
43	0	0.007	0.07
44	0	0.007	0.07
45	0	0.007	0.07
46	0	0.007	0.07
47	0	0.007	0.07
48	0	0.007	0.07
49	0	0.007	0.07
50	0	0.007	0.07
51	0	0.007	0.07
52	0	0.007	0.07
53	0	0.007	0.07
54	0	0.007	0.07
55	0	0.007	0.07
56	0	0.007	0.07
57	0	0.007	0.07
58	0	0.007	0.07
59	0	0.007	0.07
60	0	0.007	0.07

## Sheet: H202 2nd
Sr. No.	H2O2	conc.	μmol /g fwt
1	0.26	0.00804	0.0804		control v1				Borlaug2015 V1							Zincol2015 V2
2	0.2	0.0078	0.078
3	0.19	0.00776	0.0776						JA			JA+APHID						JA			JA+APHID
4	0.049	0.007196	0.07196		0.1mM JA			CONTROL	0.1mM JA	1mM JA	Aphid	0.1mM+aphid	1mM+aphid				CONTROL	0.1mM JA	1mM JA	Aphid	0.1mM+aphid	1mM+aphid
5	0.051	0.007204	0.07204				R1	0.0804	0.07196	0.07276	0.17408	0.1208	0.13816			R1	0.0808	0.07276	0.14436	0.17548	0.11996	0.14436
6	0.083	0.007332	0.07332				R2	0.078	0.07204	0.07364	0.17024	0.1136	0.14564			R2	0.0816	0.07352	0.13696	0.17496	0.12032	0.13696
7	0.069	0.007276	0.07276		1mM JA		R3	0.0776	0.07332	0.07336	0.22564	0.0812	0.13244			R3	0.0768	0.07236	0.13016	0.14192	0.12436	0.13016
8	0.091	0.007364	0.07364				AVERAGE	0.0786667	0.07244	0.0732533	0.189987	0.1052	0.138747			AVERAGE	0.0797333	0.07288	0.13716	0.16412	0.121547	0.13716
9	0.084	0.007336	0.07336				SD	0.00151438	0.000763151	0.000449592	0.0309363	0.0210941	0.00661953			SD	0.00257164	0.000589237	0.00710211	0.0192275	0.00244306	0.00710211
10	2.602	0.017408	0.17408		Aphid		SE	0.000874351	0.000440619	0.00025958	0.0178616	0.012179	0.0038219			SE	0.00148478	0.000340206	0.00410053	0.0111013	0.00141054	0.00410053
11	2.506	0.017024	0.17024
12	3.891	0.022564	0.22564					Borlaug-2015	Zincol-2015
13	1.27	0.01208	0.1208		0.1mM+aphid		Control	0.0786667	0.0797333
14	1.09	0.01136	0.1136				0.1 Mm JA	0.07244	0.07288
15	0.28	0.00812	0.0812				1 mM JA	0.0732533	0.13716
16	1.704	0.013816	0.13816		1mMJA+aphid		Aphid	0.189987	0.16412
17	1.891	0.014564	0.14564				0.1 mM + aphid	0.1052	0.121547
18	1.561	0.013244	0.13244				1 mM JA + aphid	0.138747	0.13716
19	0.27	0.00808	0.0808		control v2
20	0.29	0.00816	0.0816
21	0.17	0.00768	0.0768				Control	0.000874351	0.00148478
22	0.069	0.007276	0.07276		0.1mM JA		0.1 Mm JA	0.000440619	0.000340206
23	0.088	0.007352	0.07352				1 mM JA	0.00025958	0.00410053
24	0.059	0.007236	0.07236				Aphid	0.0178616	0.0111013
25	1.859	0.014436	0.14436		1mM JA		0.1 mM + aphid	0.012179	0.00141054
26	1.674	0.013696	0.13696				1 mM JA + aphid	0.0038219	0.00410053
27	1.504	0.013016	0.13016
28	2.637	0.017548	0.17548		Aphid
29	2.624	0.017496	0.17496
30	1.798	0.014192	0.14192
31	1.249	0.011996	0.11996		0.1mM+aphid
32	1.258	0.012032	0.12032
33	1.359	0.012436	0.12436
34	1.859	0.014436	0.14436		1mMJA+aphid
35	1.674	0.013696	0.13696
36	1.504	0.013016	0.13016
37	0	0.007	0.07
38	0	0.007	0.07
39	0	0.007	0.07
40	0	0.007	0.07
41	0	0.007	0.07
42	0	0.007	0.07
43	0	0.007	0.07
44	0	0.007	0.07
45	0	0.007	0.07
46	0	0.007	0.07
47	0	0.007	0.07
48	0	0.007	0.07
49	0	0.007	0.07
50	0	0.007	0.07
51	0	0.007	0.07
52	0	0.007	0.07
53	0	0.007	0.07
54	0	0.007	0.07
55	0	0.007	0.07
56	0	0.007	0.07
57	0	0.007	0.07
58	0	0.007	0.07
59	0	0.007	0.07
60	0	0.007	0.07

## Sheet: H202 3rd
Sr. No.	H2O2	conc.	μmol /g fwt
1	0.312	0.008248	0.08248		control v1				Borlaug2015 V1							Zincol2015 V2
2	0.29	0.00816	0.0816
3	0.31	0.00824	0.0824						JA			JA+APHID						JA			JA+APHID
4	0.041	0.007164	0.07164		0.1mM JA			CONTROL	0.1mM JA	1mM JA	Aphid	0.1mM+aphid	1mM+aphid				CONTROL	0.1mM JA	1mM JA	Aphid	0.1mM+aphid	1mM+aphid
5	0.052	0.007208	0.07208				R1	0.08248	0.07164	0.1548	0.14372	0.11872	0.1548			R1	0.0792	0.07336	0.07268	0.07924	0.10856	0.14636
6	0.071	0.007284	0.07284				R2	0.0816	0.07208	0.1476	0.13452	0.11452	0.1476			R2	0.08168	0.07204	0.07296	0.14784	0.12316	0.13496
7	2.12	0.01548	0.1548		1mM JA		R3	0.0824	0.07284	0.11644	0.14992	0.11884	0.11644			R3	0.07656	0.07264	0.0722	0.14952	0.11868	0.11852
8	1.94	0.01476	0.1476				AVERAGE	0.08216	0.0721867	0.139613	0.14272	0.11736	0.139613			AVERAGE	0.0791467	0.07268	0.0726133	0.125533	0.1168	0.13328
9	1.161	0.011644	0.11644				SD	0.000486621	0.000607069	0.020389	0.00774855	0.00246024	0.020389			SD	0.00256042	0.000660908	0.000384361	0.0401	0.00747936	0.0139958
10	1.843	0.014372	0.14372		Aphid		SE	0.000280959	0.000350502	0.011772	0.00447376	0.00142046	0.011772			SE	0.0014783	0.000381587	0.000221917	0.0231524	0.00431834	0.00808073
11	1.613	0.013452	0.13452
12	1.998	0.014992	0.14992					Borlaug-2015	Zincol-2015
13	1.218	0.011872	0.11872		0.1mM+aphid		Control	0.08216	0.0791467
14	1.113	0.011452	0.11452				0.1 Mm JA	0.0721867	0.07268
15	1.221	0.011884	0.11884				1 mM JA	0.139613	0.0726133
16	2.12	0.01548	0.1548		1mMJA+aphid		Aphid	0.14272	0.125533
17	1.94	0.01476	0.1476				0.1 mM + aphid	0.11736	0.1168
18	1.161	0.011644	0.11644				1 mM JA + aphid	0.139613	0.13328
19	0.23	0.00792	0.0792		control v2
20	0.292	0.008168	0.08168
21	0.164	0.007656	0.07656				Control	0.000280959	0.0014783
22	0.084	0.007336	0.07336		0.1mM JA		0.1 Mm JA	0.000350502	0.000381587
23	0.051	0.007204	0.07204				1 mM JA	0.011772	0.000221917
24	0.066	0.007264	0.07264				Aphid	0.00447376	0.0231524
25	0.067	0.007268	0.07268		1mM JA		0.1 mM + aphid	0.00142046	0.00431834
26	0.074	0.007296	0.07296				1 mM JA + aphid	0.011772	0.00808073
27	0.055	0.00722	0.0722
28	0.231	0.007924	0.07924		Aphid
29	1.946	0.014784	0.14784
30	1.988	0.014952	0.14952
31	0.964	0.010856	0.10856		0.1mM+aphid
32	1.329	0.012316	0.12316
33	1.217	0.011868	0.11868
34	1.909	0.014636	0.14636		1mMJA+aphid
35	1.624	0.013496	0.13496
36	1.213	0.011852	0.11852
37	0	0.007	0.07
38	0	0.007	0.07
39	0	0.007	0.07
40	0	0.007	0.07
41	0	0.007	0.07
42	0	0.007	0.07
43	0	0.007	0.07
44	0	0.007	0.07
45	0	0.007	0.07
46	0	0.007	0.07
47	0	0.007	0.07
48	0	0.007	0.07
49	0	0.007	0.07
50	0	0.007	0.07
51	0	0.007	0.07
52	0	0.007	0.07
53	0	0.007	0.07
54	0	0.007	0.07
55	0	0.007	0.07
56	0	0.007	0.07
57	0	0.007	0.07
58	0	0.007	0.07
59	0	0.007	0.07
60	0	0.007	0.07

## Sheet: h2o2 4th
Sr. No.	H2O2	conc.	μmol /g fwt
1	0.112	0.007448	0.07448		control v1				Borlaug2015 V1							Zincol2015 V2
2	0.21	0.00784	0.0784
3	0.29	0.00816	0.0816						JA			JA+APHID						JA			JA+APHID
4	0.021	0.007084	0.07084		0.1mM JA			CONTROL	0.1mM JA	1mM JA	Aphid	0.1mM+aphid	1mM+aphid				CONTROL	0.1mM JA	1mM JA	Aphid	0.1mM+aphid	1mM+aphid
5	0.015	0.00706	0.0706				R1	0.07448	0.07084	0.07076	0.15036	0.1542	0.14988			R1	0.0776	0.07096	0.07048	0.13768	0.14956	0.14764
6	0.011	0.007044	0.07044				R2	0.0784	0.0706	0.07088	0.15412	0.15688	0.14948			R2	0.0744	0.07076	0.07044	0.13852	0.17756	0.14884
7	0.019	0.007076	0.07076		1mM JA		R3	0.0816	0.07044	0.07096	0.15056	0.14568	0.15452			R3	0.0784	0.07092	0.07048	0.14604	0.15588	0.14972
8	0.022	0.007088	0.07088				AVERAGE	0.07816	0.0706267	0.0708667	0.15168	0.152253	0.151293			AVERAGE	0.0768	0.07088	0.0704667	0.140747	0.161	0.148733
9	0.024	0.007096	0.07096				SD	0.00356606	0.000201329	0.000100664	0.00211547	0.00584826	0.00280152			SD	0.0021166	0.00010583	2.3094e-05	0.00460336	0.0146854	0.00104409
10	2.009	0.015036	0.15036		Aphid		SE	0.00205893	0.000116241	5.81204e-05	0.0012214	0.00337659	0.00161751			SE	0.00122206	0.00023601	1.33337e-05	0.00265783	0.00847886	0.000602826
11	2.103	0.015412	0.15412
12	2.014	0.015056	0.15056							Borlaug-2015	Zincol-2015
13	2.105	0.01542	0.1542		0.1mM+aphid				Control	0.06006	0.0668
14	2.172	0.015688	0.15688						0.1 mM JA	0.0626667	0.06618
15	1.892	0.014568	0.14568						1 mM JA	0.0686667	0.0697867
16	1.997	0.014988	0.14988		1mMJA+aphid				Aphid	0.13168	0.120447
17	1.987	0.014948	0.14948						0.1 mM + aphid	0.102533	0.101
18	2.113	0.015452	0.15452						1 mM JA + aphid	0.102933	0.101133
19	0.19	0.00776	0.0776		control v2
20	0.11	0.00744	0.0744
21	0.21	0.00784	0.0784						Control	0.00205893	0.00122206
22	0.024	0.007096	0.07096		0.1mM JA				0.1 Mm JA	0.000237025	0.00023601
23	0.019	0.007076	0.07076						1 mM JA	0.000214586	0.000242586
24	0.023	0.007092	0.07092						Aphid	0.00611466	0.00246068
25	0.012	0.007048	0.07048		1mM JA				0.1 mM + aphid	0.00129358	0.0047966
26	0.011	0.007044	0.07044						1 mM JA + aphid	0.0104565	0.00205893
27	0.012	0.007048	0.07048
28	1.692	0.013768	0.13768		Aphid
29	1.713	0.013852	0.13852
30	1.901	0.014604	0.14604
31	1.989	0.014956	0.14956		0.1mM+aphid
32	2.689	0.017756	0.17756
33	2.147	0.015588	0.15588
34	1.941	0.014764	0.14764		1mMJA+aphid
35	1.971	0.014884	0.14884
36	1.993	0.014972	0.14972
37	0	0.007	0.07
38	0	0.007	0.07
39	0	0.007	0.07
40	0	0.007	0.07
41	0	0.007	0.07
42	0	0.007	0.07
43	0	0.007	0.07
44	0	0.007	0.07
45	0	0.007	0.07
46	0	0.007	0.07
47	0	0.007	0.07
48	0	0.007	0.07
49	0	0.007	0.07
50	0	0.007	0.07
51	0	0.007	0.07
52	0	0.007	0.07
53	0	0.007	0.07
54	0	0.007	0.07
55	0	0.007	0.07
56	0	0.007	0.07
57	0	0.007	0.07
58	0	0.007	0.07
59	0	0.007	0.07
60	0	0.007	0.07

## Sheet:  MDA 1
Sr. No.	MDA
1	532nm	600nm		mmol/ml							Borlaug2015 V1							Zincol2015 V2
2	0.445	0.241	0.204	1.31613		control v1
3	0.562	0.398	0.164	1.05806							JA			JA+APHID						JA			JA+APHID
4	0.771	0.509	0.262	1.69032						CONTROL	0.1mM JA	1mM JA	Aphid	0.1mM+aphid	1mM+aphid				CONTROL	0.1mM JA	1mM JA	Aphid	0.1mM+aphid	1mM+aphid
5	1.432	0.945	0.487	3.14194		0.1mM JA			R1	1.31613	3.14194	4.37419	4.85806	5.72903	5.87097			R1	1.10968	2.56774	7.26452	5.06452	4.82581	4.87097
6	1.541	0.832	0.709	4.57419					R2	1.05806	4.57419	3.53548	5.74194	6.76129	5.80645			R2	1.68387	3.54194	6.02581	4.69677	5.95484	4.80645
7	1.682	0.899	0.783	5.05161					R3	1.69032	5.05161	5.90968	6.46452	5.16774	5.01935			R3	3.01935	3.53548	5.52258	7.32258	5.8129	5.72258
8	1.612	0.934	0.678	4.37419		1mM JA			AVERAGE	1.35484	4.25591	4.60645	5.68817	5.88602	5.56559			AVERAGE	1.93763	3.21505	6.27097	5.69462	5.53118	5.13333
9	1.513	0.965	0.548	3.53548					SD	0.317902	0.993828	1.20402	0.804574	0.80829	0.474153			SD	0.979803	0.560598	0.896472	1.42179	0.614982	0.511322
10	1.792	0.876	0.916	5.90968					SE	0.183546	0.573803	0.69516	0.464535	0.46668	0.273761			SE	0.565706	0.323671	0.517594	0.820896	0.355071	0.29522
11	1.987	1.234	0.753	4.85806		Aphid
12	2.011	1.121	0.89	5.74194
13	1.991	0.989	1.002	6.46452						Borlaug-2015	Zincol-2015								mmol/ml
14	1.742	0.854	0.888	5.72903		0.1mM+aphid			Control	1.35484	1.93763
15	1.769	0.721	1.048	6.76129					0.1 Mm JA	4.25591	3.21505
16	1.564	0.763	0.801	5.16774					1 mM JA	4.60645	6.27097
17	1.922	1.012	0.91	5.87097		1mMJA+aphid			Aphid	5.68817	5.69462
18	1.832	0.932	0.9	5.80645					0.1 mM + aphid	5.88602	5.53118
19	1.431	0.653	0.778	5.01935					1 mM JA + aphid	5.56559	5.13333
20	0.521	0.349	0.172	1.10968		control v2
21	0.607	0.346	0.261	1.68387
22	0.591	0.123	0.468	3.01935					Control	0.183546	0.565706
23	1.321	0.923	0.398	2.56774		0.1mM JA			0.1 Mm JA	0.368676	0.385618
24	1.414	0.865	0.549	3.54194					1 mM JA	0.751336	0.391409
25	1.342	0.794	0.548	3.53548					Aphid	0.464535	0.820896
26	1.932	0.806	1.126	7.26452		1mM JA			0.1 mM + aphid	0.46668	0.355071
27	1.789	0.855	0.934	6.02581					1 mM JA + aphid	0.273761	0.29522
28	1.632	0.776	0.856	5.52258
29	1.989	1.204	0.785	5.06452		Aphid
30	1.949	1.221	0.728	4.69677
31	2.114	0.979	1.135	7.32258
32	1.592	0.844	0.748	4.82581		0.1mM+aphid
33	1.634	0.711	0.923	5.95484
34	1.664	0.763	0.901	5.8129
35	1.867	1.112	0.755	4.87097		1mMJA+aphid
36	1.667	0.922	0.745	4.80645
37	1.542	0.655	0.887	5.72258
38	0	0	0	0
39	0	0	0	0
40	0	0	0	0
41	0	0	0	0
42	0	0	0	0
43	0	0	0	0
44	0	0	0	0
45	0	0	0	0
46	0	0	0	0
47	0	0	0	0
48	0	0	0	0
49	0	0	0	0
50	0	0	0	0
51	0	0	0	0
52	0	0	0	0
53	0	0	0	0
54	0	0	0	0
55	0	0	0	0
56	0	0	0	0
57	0	0	0	0
58	0	0	0	0
59	0	0	0	0
60	0	0	0	0

## Sheet: MDA 2
Sr. No.	MDA
1	532nm	600nm		mmol/ml							Borlaug2015 V1							Zincol2015 V2
2	0.441	0.192	0.249	1.60645		control v1
3	0.508	0.184	0.324	2.09032							JA			JA+APHID						JA			JA+APHID
4	0.741	0.119	0.622	4.0129						CONTROL	0.1mM JA	1mM JA	Aphid	0.1mM+aphid	1mM+aphid				CONTROL	0.1mM JA	1mM JA	Aphid	0.1mM+aphid	1mM+aphid
5	1.131	0.647	0.484	3.12258		0.1mM JA			R1	1.60645	3.12258	0.496774	5.93548	4.56129	7.54839			R1	2.09677	2.74194	5.2	4.48387	4.09032	6.90323
6	1.251	0.642	0.609	3.92903					R2	2.09032	3.92903	3.00645	5.54839	4.9871	8.45161			R2	2.49677	2.64516	2.96129	5.91613	4.34194	5.69677
7	1.201	0.719	0.482	3.10968					R3	4.0129	3.10968	3.85161	3.82581	5.33548	3.48387			R3	2.16129	2.72903	3.62581	6.83871	3.72258	3.21935
8	1.009	0.932	0.077	0.496774		1mM JA			AVERAGE	2.56989	3.3871	2.45161	5.10323	4.96129	6.49462			AVERAGE	2.25161	2.70538	3.92903	5.74624	4.05161	5.27312
9	1.198	0.732	0.466	3.00645					SD	1.27289	0.469374	1.74488	1.12308	0.387741	2.64621			SD	0.214752	0.0525453	1.14975	1.18658	0.311487	1.87812
10	1.241	0.644	0.597	3.85161					SE	0.734924	0.271001	1.00744	0.64843	0.223869	1.52783			SE	0.123991	0.030338	0.663825	0.68509	0.179842	1.08437
11	1.971	1.051	0.92	5.93548		Aphid
12	1.842	0.982	0.86	5.54839
13	2.114	1.521	0.593	3.82581						Borlaug-2015	Zincol-2015
14	1.641	0.934	0.707	4.56129		0.1mM+aphid			Control	2.56989	2.25161
15	1.607	0.834	0.773	4.9871					0.1 Mm JA	3.3871	2.70538
16	1.461	0.634	0.827	5.33548					1 mM JA	2.45161	3.92903
17	1.822	0.652	1.17	7.54839		1mMJA+aphid			Aphid	5.10323	5.74624
18	1.741	0.431	1.31	8.45161					0.1 mM + aphid	4.96129	4.05161
19	1.321	0.781	0.54	3.48387					1 mM JA + aphid	6.49462	5.27312
20	0.532	0.207	0.325	2.09677		control v2
21	0.601	0.214	0.387	2.49677
22	0.522	0.187	0.335	2.16129					Control
23	1.209	0.784	0.425	2.74194		0.1mM JA			0.1 Mm JA
24	1.242	0.832	0.41	2.64516					1 mM JA
25	1.332	0.909	0.423	2.72903					Aphid
26	1.341	0.535	0.806	5.2		1mM JA			0.1 mM + aphid
27	1.041	0.582	0.459	2.96129					1 mM JA + aphid
28	1.171	0.609	0.562	3.62581
29	1.732	1.037	0.695	4.48387		Aphid
30	1.884	0.967	0.917	5.91613
31	2.014	0.954	1.06	6.83871
32	1.382	0.748	0.634	4.09032		0.1mM+aphid
33	1.424	0.751	0.673	4.34194
34	1.211	0.634	0.577	3.72258
35	1.711	0.641	1.07	6.90323		1mMJA+aphid
36	1.542	0.659	0.883	5.69677
37	1.431	0.932	0.499	3.21935
38	0	0	0	0
39	0	0	0	0
40	0	0	0	0
41	0	0	0	0
42	0	0	0	0
43	0	0	0	0
44	0	0	0	0
45	0	0	0	0
46	0	0	0	0
47	0	0	0	0
48	0	0	0	0
49	0	0	0	0
50	0	0	0	0
51	0	0	0	0
52	0	0	0	0
53	0	0	0	0
54	0	0	0	0
55	0	0	0	0
56	0	0	0	0
57	0	0	0	0
58	0	0	0	0
59	0	0	0	0
60	0	0	0	0

## Sheet: MDA3
Sr. No.	MDA
1	532nm	600nm		mmol/ml							Borlaug2015 V1							Zincol2015 V2
2	0.461	0.247	0.214	1.38065		control v1
3	0.511	0.425	0.086	0.554839							JA			JA+APHID						JA			JA+APHID
4	0.642	0.341	0.301	1.94194						CONTROL	0.1mM JA	1mM JA	Aphid	0.1mM+aphid	1mM+aphid				CONTROL	0.1mM JA	1mM JA	Aphid	0.1mM+aphid	1mM+aphid
5	1.632	1.214	0.418	2.69677		0.1mM JA			R1	1.38065	2.69677	4.50323	6.07097	1.94194	8.51613			R1	1.10968	3.28387	4.35484	6.89032	5.54839	5.34839
6	1.609	1.031	0.578	3.72903					R2	0.554839	3.72903	2.65161	5.05161	5.16129	8.82581			R2	2.39355	3.70968	0.387097	6.34839	5.27742	6.75419
7	1.717	0.941	0.776	5.00645					R3	1.94194	5.00645	5.54839	8.19355	5.90968	2.4129			R3	2.85161	5.18065	2.30968	8.64516	4.43226	4.97419
8	1.609	0.911	0.698	4.50323		1mM JA			AVERAGE	1.29247	3.81075	4.23441	6.43871	4.33763	6.58495			AVERAGE	2.11828	4.05806	2.35054	7.29462	5.08602	5.69226
9	1.242	0.831	0.411	2.65161					SD	0.697739	1.15701	1.46698	1.60292	2.10821	3.61641			SD	0.903003	0.995223	1.98419	1.20058	0.582161	0.938502
10	1.709	0.849	0.86	5.54839					SE	0.402852	0.668017	0.846985	0.925476	1.21721	2.088			SE	0.521364	0.574609	1.1456	0.693174	0.33612	0.54186
11	1.942	1.001	0.941	6.07097		Aphid
12	1.994	1.211	0.783	5.05161
13	2.204	0.934	1.27	8.19355						Borlaug-2015	Zincol-2015
14	1.732	1.431	0.301	1.94194		0.1mM+aphid			Control	1.29247	2.11828
15	1.741	0.941	0.8	5.16129					0.1 Mm JA	3.81075	4.05806
16	1.561	0.645	0.916	5.90968					1 mM JA	4.23441	2.35054
17	1.841	0.521	1.32	8.51613		1mMJA+aphid			Aphid	6.43871	7.29462
18	1.809	0.441	1.368	8.82581					0.1 mM + aphid	4.33763	5.08602
19	1.342	0.968	0.374	2.4129					1 mM JA + aphid	6.58495	5.69226
20	0.493	0.321	0.172	1.10968		control v2
21	0.592	0.221	0.371	2.39355
22	0.589	0.147	0.442	2.85161					Control	0.402852	0.521364
23	1.741	1.232	0.509	3.28387		0.1mM JA			0.1 Mm JA	0.668017	0.574609
24	1.509	0.934	0.575	3.70968					1 mM JA	0.846985	1.1456
25	1.731	0.928	0.803	5.18065					Aphid	0.925476	0.693174
26	1.509	0.834	0.675	4.35484		1mM JA			0.1 mM + aphid	1.21721	0.33612
27	1.311	1.251	0.06	0.387097					1 mM JA + aphid	2.088	0.54186
28	1.492	1.134	0.358	2.30968
29	2.014	0.946	1.068	6.89032		Aphid
30	1.945	0.961	0.984	6.34839
31	2.321	0.981	1.34	8.64516
32	1.492	0.632	0.86	5.54839		0.1mM+aphid
33	1.559	0.741	0.818	5.27742
34	1.348	0.661	0.687	4.43226
35	1.761	0.932	0.829	5.34839		1mMJA+aphid
36	1.6119	0.565	1.0469	6.75419
37	1.542	0.771	0.771	4.97419
38	0	0	0	0
39	0	0	0	0
40	0	0	0	0
41	0	0	0	0
42	0	0	0	0
43	0	0	0	0
44	0	0	0	0
45	0	0	0	0
46	0	0	0	0
47	0	0	0	0
48	0	0	0	0
49	0	0	0	0
50	0	0	0	0
51	0	0	0	0
52	0	0	0	0
53	0	0	0	0
54	0	0	0	0
55	0	0	0	0
56	0	0	0	0
57	0	0	0	0
58	0	0	0	0
59	0	0	0	0
60	0	0	0	0

## Sheet: MDA 4
Sr. No.	MDA
1	532nm	600nm		mmol/ml							Borlaug2015 V1							Zincol2015 V2
2	0.562	0.184	0.378	2.43871		control v1
3	0.509	0.144	0.365	2.35484							JA			JA+APHID						JA			JA+APHID
4	0.41	0.129	0.281	1.8129						CONTROL	0.1mM JA	1mM JA	Aphid	0.1mM+aphid	1mM+aphid				CONTROL	0.1mM JA	1mM JA	Aphid	0.1mM+aphid	1mM+aphid
5	0.461	0.247	0.214	1.38065		0.1mM JA			R1	2.43871	1.38065	0.858065	5.55484	6.07097	6.8			R1	1.69032	1.31613	2.58065	3.85806	4.56129	5.79355
6	0.511	0.425	0.086	0.554839					R2	2.35484	0.554839	1.06452	9.29032	5.05161	8.09032			R2	2.42581	1.05806	2.34194	7.78065	4.9871	8.02581
7	0.642	0.341	0.301	1.94194					R3	1.8129	1.94194	1.72903	2.62581	8.19355	9.46452			R3	2.58065	1.69032	1.94839	7.60645	5.33548	9.54194
8	0.765	0.632	0.133	0.858065		1mM JA			AVERAGE	2.20215	1.29247	1.2172	5.82366	6.43871	8.11828			AVERAGE	2.23226	1.35484	2.29032	6.41505	4.96129	7.7871
9	0.697	0.532	0.165	1.06452					SD	0.339696	0.697739	0.455117	3.34038	1.60292	1.33248			SD	0.475672	0.317902	0.319273	2.21613	0.387741	1.88556
10	0.712	0.444	0.268	1.72903					SE	0.19613	0.402852	0.26277	1.92863	0.925476	0.769329			SE	0.274638	0.183546	0.184338	1.27952	0.223869	1.08866
11	1.952	1.091	0.861	5.55484		Aphid
12	2.431	0.991	1.44	9.29032
13	1.849	1.442	0.407	2.62581						Borlaug-2015	Zincol-2015
14	1.942	1.001	0.941	6.07097		0.1mM+aphid			Control	3.20215	2.73226
15	1.994	1.211	0.783	5.05161					0.1 mM JA	2.72473	2.35484
16	2.204	0.934	1.27	8.19355					1 mM JA	2.3172	2.29032
17	1.998	0.944	1.054	6.8		1mMJA+aphid			Aphid	6.82366	6.41505
18	2.221	0.967	1.254	8.09032					0.1 mM + aphid	5.43871	4.96129
19	2.311	0.844	1.467	9.46452					1 mMJA + aphid	4.11828	3.7871
20	0.471	0.209	0.262	1.69032		control v2
21	0.591	0.215	0.376	2.42581
22	0.589	0.189	0.4	2.58065					Control
23	0.445	0.241	0.204	1.31613		0.1mM JA			0.1 Mm JA
24	0.562	0.398	0.164	1.05806					1 mM JA
25	0.771	0.509	0.262	1.69032					Aphid
26	0.735	0.335	0.4	2.58065		1mM JA			0.1 mM + aphid
27	0.745	0.382	0.363	2.34194					1 mM JA + aphid
28	0.711	0.409	0.302	1.94839
29	1.692	1.094	0.598	3.85806		Aphid
30	2.203	0.997	1.206	7.78065
31	2.011	0.832	1.179	7.60645
32	1.641	0.934	0.707	4.56129		0.1mM+aphid
33	1.607	0.834	0.773	4.9871
34	1.461	0.634	0.827	5.33548
35	1.992	1.094	0.898	5.79355		1mMJA+aphid
36	2.211	0.967	1.244	8.02581
37	2.311	0.832	1.479	9.54194
38	0	0	0	0
39	0	0	0	0
40	0	0	0	0
41	0	0	0	0
42	0	0	0	0
43	0	0	0	0
44	0	0	0	0
45	0	0	0	0
46	0	0	0	0
47	0	0	0	0
48	0	0	0	0
49	0	0	0	0
50	0	0	0	0
51	0	0	0	0
52	0	0	0	0
53	0	0	0	0
54	0	0	0	0
55	0	0	0	0
56	0	0	0	0
57	0	0	0	0
58	0	0	0	0
59	0	0	0	0
60	0	0	0	0
