# Supplementary material for: Exploring the effect of Jasmonic Acid for Aphids control for improving the yield of Triticum aestivum varieties
Source: PeerJ. 2022 Oct 27;10:e14018. doi: 10.7717/peerj.14018 (PMC9618260; doi:10.7717/peerj.14018)
Supplement: Supplemental Information 5 [file peerj-10-14018-s005.xlsx]

## Sheet: POD1
	0	30	60	90	120	30-0	60-30	90-60	120-90	Average	change in A/30 sec	change in A/1 min	Units/5µl sample	Pro(mg/5µl sample)	Units/mg Pro	Units/µg pro
1	1.723	1.908	1.494	2.188	1.544	0.185	-0.414	0.694	-0.644	0.304	0.304	0.608	60.8	0.0211978	2868.22	2.86822		control v1
2	1.723	1.908	1.494	2.188	1.544	0.185	-0.414	0.694	-0.644	0.304	0.304	0.608	60.8	0.0214453	2835.12	2.83512
3	1.723	1.908	1.494	2.188	1.544	0.185	-0.414	0.694	-0.644	0.304	0.304	0.608	60.8	0.0339664	1790	1.79
4	0.374	0.606	0.911	1.068	1.532	0.232	0.305	0.157	0.464	0.81	0.81	1.62	162	0.0383216	4227.39	4.22739		0.1mM JA
5	0.449	0.451	0.671	0.672	1.008	0.002	0.22	0.001	0.336	0.307	0.307	0.614	61.4	0.0250086	2455.15	2.45515
6	0.345	0.452	0.677	0.945	1.124	0.107	0.225	0.268	0.179	0.64475	0.64475	1.2895	128.95	0.0383216	3364.95	3.36495
7	0.437	0.674	1.103	1.239	1.399	0.237	0.429	0.136	0.16	0.842	0.842	1.684	168.4	0.0297597	5658.66	5.65866		1mM JA
8	0.467	0.774	1.113	1.439	1.699	0.307	0.339	0.326	0.26	1.037	1.037	2.074	207.4	0.0252561	8211.89	8.21189
9	0.404	0.564	0.945	1.039	1.299	0.16	0.381	0.094	0.26	0.7	0.7	1.4	140	0.0226826	6172.14	6.17214
10	0.558	1.098	1.539	1.913	2.198	2.198	0.441	0.374	0.285	3.08425	3.08425	6.1685	616.85	0.025553	24140	24.14		Aphid
11	0.465	0.794	1.086	1.355	1.599	1.599	0.292	0.269	0.244	2.221	2.221	4.442	444.2	0.0308485	14399.4	14.3994
12	0.532	0.784	1.076	1.432	1.938	1.938	0.292	0.356	0.506	2.7125	2.7125	5.425	542.5	0.0291163	18632.2	18.6322
13	0.924	1.621	2.032	2.553	2.578	0.697	0.411	0.521	0.025	1.63525	1.63525	3.2705	327.05	0.0259489	12603.6	12.6036		0.1mM+aphid
14	0.924	1.621	2.032	2.553	2.578	0.697	0.411	0.521	0.025	1.63525	1.63525	3.2705	327.05	0.0233259	14020.9	14.0209
15	0.567	0.965	1.133	1.853	2.567	0.398	0.168	0.72	0.714	1.4645	1.4645	2.929	292.9	0.0258994	11309.1	11.3091
16	0.765	1.166	1.572	2.127	2.411	0.401	0.406	0.555	0.284	1.433	1.433	2.866	286.6	0.0288689	9927.65	9.92765		1mMJA+aphid
17	0.852	1.128	1.833	2.511	2.732	0.276	0.705	0.678	0.221	1.71425	1.71425	3.4285	342.85	0.0383216	8946.66	8.94666
18	0.752	1.128	1.533	1.927	2.011	0.376	0.405	0.394	0.084	1.196	1.196	2.392	239.2	0.0250086	9564.7	9.5647
19	0.449	0.451	0.671	0.672	1.008	0.002	0.22	0.001	0.336	0.307	0.307	0.614	61.4	0.0250086	2455.15	2.45515		control v2
20	0.232	0.273	0.314	0.353	0.391	0.041	0.041	0.039	0.038	0.1305	0.1305	0.261	26.1	0.0288689	904.088	0.904088
21	0.345	0.452	0.677	0.945	1.124	0.107	0.225	0.268	0.179	0.64475	0.64475	1.2895	128.95	0.0383216	3364.95	3.36495
22	0.408	0.671	0.911	1.216	1.318	0.263	0.24	0.305	0.102	0.8335	0.8335	1.667	166.7	0.0383216	4350.03	4.35003		0.1mM JA
23	0.432	0.845	1.092	1.331	1.531	0.413	0.247	0.239	0.2	0.949	0.949	1.898	189.8	0.0339664	5587.88	5.58788
24	0.374	0.606	0.911	1.068	1.532	0.232	0.305	0.157	0.464	0.81	0.81	1.62	162	0.0383216	4227.39	4.22739
25	0.365	0.565	0.932	1.108	1.121	0.2	0.367	0.176	0.013	0.74625	0.74625	1.4925	149.25	0.0250086	5967.94	5.96794		1mM JA
26	0.354	0.623	0.863	1.124	1.143	0.269	0.24	0.261	0.019	0.77475	0.77475	1.5495	154.95	0.0193667	8000.85	8.00085
27	0.443	0.628	0.953	1.112	1.125	0.185	0.325	0.159	0.013	0.67225	0.67225	1.3445	134.45	0.0214453	6269.44	6.26944
28	1.214	1.876	2.068	2.645	3.107	0.662	0.192	0.577	0.462	1.5465	1.5465	3.093	309.3	0.0234744	13176.1	13.1761		Aphid
29	1.145	2.089	2.722	3.107	3.25	0.944	0.633	0.385	0.143	1.99775	1.99775	3.9955	399.55	0.0211978	18848.6	18.8486
30	0.924	1.621	2.032	2.553	2.578	0.697	0.411	0.521	0.025	1.63525	1.63525	3.2705	327.05	0.0193172	16930.5	16.9305
31	0.652	1.283	1.329	2.257	2.286	0.631	0.046	0.928	0.029	1.61225	1.61225	3.2245	322.45	0.0273842	11775.1	11.7751		0.1mM+aphid
32	0.795	1.29	1.624	1.886	2.085	0.495	0.334	0.262	0.199	1.14075	1.14075	2.2815	228.15	0.0290668	7849.15	7.84915
33	1.143	2.076	2.718	3.102	3.243	0.933	0.642	0.384	0.141	1.99425	1.99425	3.9885	398.85	0.0433696	9196.54	9.19654
34	0.652	1.283	1.329	2.257	2.286	0.631	0.046	0.928	0.029	1.61225	1.61225	3.2245	322.45	0.0273842	11775.1	11.7751		1mMJA+aphid
35	0.752	1.128	1.533	1.927	2.011	0.376	0.405	0.394	0.084	1.196	1.196	2.392	239.2	0.0250086	9564.7	9.5647
36	0.354	0.623	0.863	1.124	1.143	0.269	0.24	0.261	0.019	0.77475	0.77475	1.5495	154.95	0.0193667	8000.85	8.00085

## Sheet: POD2
	0	30	60	90	120	30-0	60-30	90-60	120-90	Average	change in A/30 sec	change in A/1 min	Units/5µl sample	Pro(mg/5µl sample)	Units/mg Pro	Units/µg pro
1	0.643	0.654	0.756	0.887	0.954	0.011	0.102	0.131	0.067	0.26075	0.26075	0.5215	52.15	0.0211978	2460.16	2.46016		control v1
2	0.332	0.367	0.511	0.643	0.776	0.035	0.144	0.132	0.133	0.34425	0.34425	0.6885	68.85	0.0214453	3210.49	3.21049
3	0.342	0.534	0.654	0.764	1.943	0.192	0.12	0.11	1.179	0.71675	0.71675	1.4335	143.35	0.0339664	4220.35	4.22035
4	1.731	1.894	1.898	2.183	2.392	0.163	0.004	0.285	0.209	0.50425	0.50425	1.0085	100.85	0.0383216	2631.68	2.63168		0.1mM JA
5	1.35	1.621	1.855	1.916	1.982	0.271	0.234	0.061	0.066	0.5825	0.5825	1.165	116.5	0.0250086	4658.4	4.6584
6	0.914	0.946	1.431	1.487	1.865	0.032	0.485	0.056	0.378	0.6675	0.6675	1.335	133.5	0.0383216	3483.68	3.48368
7	0.354	0.611	0.828	1.0521	1.231	0.257	0.217	0.2241	0.1789	0.742825	0.742825	1.48565	148.565	0.0297597	4992.15	4.99215		1mM JA
8	0.451	0.478	0.567	0.632	0.765	0.027	0.089	0.065	0.133	0.21425	0.21425	0.4285	42.85	0.0252561	1696.62	1.69662
9	0.742	0.765	0.792	1.021	1.342	0.023	0.027	0.229	0.321	0.35925	0.35925	0.7185	71.85	0.0226826	3167.63	3.16763
10	0.664	1.096	1.467	1.788	2.162	2.198	0.371	0.321	0.374	2.9835	2.9835	5.967	596.7	0.025553	23351.5	23.3515		Aphid
11	0.813	1.504	2.457	3.005	3.077	1.599	0.953	0.548	0.072	3.118	3.118	6.236	623.6	0.0308485	20214.9	20.2149
12	0.967	1.369	1.695	2.132	2.443	1.938	0.326	0.437	0.311	2.77875	2.77875	5.5575	555.75	0.0291163	19087.2	19.0872
13	1.224	2.132	2.659	2.978	3.124	0.908	0.527	0.319	0.146	1.7905	1.7905	3.581	358.1	0.0259489	13800.2	13.8002		0.1mM+aphid
14	0.786	0.854	0.945	1.465	1.578	0.068	0.091	0.52	0.113	0.70725	0.70725	1.4145	141.45	0.0233259	6064.07	6.06407
15	0.355	0.745	0.965	1.213	1.603	0.39	0.22	0.248	0.39	0.9555	0.9555	1.911	191.1	0.0258994	7378.54	7.37854
16	0.231	0.652	0.943	1.156	1.423	0.421	0.291	0.213	0.267	0.99175	0.99175	1.9835	198.35	0.0288689	6870.72	6.87072		1mMJA+aphid
17	0.3532	0.791	0.975	1.191	1.689	0.4378	0.184	0.216	0.498	0.9623	0.9623	1.9246	192.46	0.0383216	5022.24	5.02224
18	0.282	0.521	0.745	0.931	1.071	0.239	0.224	0.186	0.14	0.684	0.684	1.368	136.8	0.0250086	5470.12	5.47012
19	0.591	0.624	0.867	0.965	1.126	0.033	0.243	0.098	0.161	0.41425	0.41425	0.8285	82.85	0.0250086	3312.86	3.31286		control v2
20	0.211	0.245	0.332	0.419	0.429	0.034	0.087	0.087	0.01	0.2105	0.2105	0.421	42.1	0.0288689	1458.32	1.45832
21	0.741	0.854	0.897	1.107	1.181	0.113	0.043	0.21	0.074	0.3845	0.3845	0.769	76.9	0.0383216	2006.7	2.0067
22	0.481	0.518	0.632	0.754	0.853	0.037	0.114	0.122	0.099	0.29775	0.29775	0.5955	59.55	0.0383216	1553.96	1.55396		0.1mM JA
23	0.388	0.614	0.819	0.987	1.134	0.226	0.205	0.168	0.147	0.63575	0.63575	1.2715	127.15	0.0339664	3743.41	3.74341
24	0.408	0.617	0.845	1.012	1.542	0.209	0.228	0.167	0.53	0.7365	0.7365	1.473	147.3	0.0383216	3843.79	3.84379
25	1.742	1.912	1.599	2.251	2.978	0.17	-0.313	0.652	0.727	0.69075	0.69075	1.3815	138.15	0.0250086	5524.1	5.5241		1mM JA
26	0.628	0.745	0.811	0.894	1.165	0.117	0.066	0.083	0.271	0.33375	0.33375	0.6675	66.75	0.0193667	3446.64	3.44664
27	0.987	1.069	1.135	1.278	1.223	0.082	0.066	0.143	-0.055	0.27725	0.27725	0.5545	55.45	0.0214453	2585.65	2.58565
28	0.372	0.581	0.981	1.114	1.193	0.209	0.4	0.133	0.079	0.76175	0.76175	1.5235	152.35	0.0234744	6490.05	6.49005		Aphid
29	1.145	2.089	2.722	3.107	3.25	0.944	0.633	0.385	0.143	1.99775	1.99775	3.9955	399.55	0.0211978	18848.6	18.8486
30	0.924	1.621	2.032	2.553	2.578	0.697	0.411	0.521	0.025	1.63525	1.63525	3.2705	327.05	0.0193172	16930.5	16.9305
31	0.652	0.786	0.896	1.288	1.486	0.134	0.11	0.392	0.198	0.6855	0.6855	1.371	137.1	0.0273842	5006.54	5.00654		0.1mM+aphid
32	0.895	1.293	1.624	1.986	2.185	0.398	0.331	0.362	0.199	1.14075	1.14075	2.2815	228.15	0.0290668	7849.15	7.84915
33	1.143	2.076	2.718	3.102	3.243	0.933	0.642	0.384	0.141	1.99425	1.99425	3.9885	398.85	0.0433696	9196.54	9.19654
34	0.652	0.786	0.811	0.891	0.987	0.134	0.025	0.08	0.096	0.263	0.263	0.526	52.6	0.0273842	1920.82	1.92082		1mMJA+aphid
35	0.788	1.128	1.533	1.927	2.008	0.34	0.405	0.394	0.081	1.15925	1.15925	2.3185	231.85	0.0250086	9270.81	9.27081
36	0.367	0.623	0.863	1.124	1.133	0.256	0.24	0.261	0.009	0.75925	0.75925	1.5185	151.85	0.0193667	7840.78	7.84078

## Sheet: POD 3
	0	30	60	90	120	30-0	60-30	90-60	120-90	Average	change in A/30 sec	change in A/1 min	Units/5µl sample	Pro(mg/5µl sample)	Units/mg Pro	Units/µg pro
1	1.051	1.099	1.349	1.515	1.621	0.048	0.25	0.166	0.106	0.4905	0.4905	0.981	98.1	0.0211978	4627.83	4.62783		control v1
2	0.243	0.309	0.388	0.412	0.472	0.066	0.079	0.024	0.06	0.184	0.184	0.368	36.8	0.0214453	1715.99	1.71599
3	0.402	0.451	0.523	0.598	0.625	0.049	0.072	0.075	0.027	0.20275	0.20275	0.4055	40.55	0.0339664	1193.83	1.19383
4	1.746	2.394	2.861	3.183	3.392	0.648	0.467	0.322	0.209	1.48925	1.48925	2.9785	297.85	0.0383216	7772.39	7.77239		0.1mM JA
5	1.788	1.943	2.391	2.561	2.931	0.155	0.448	0.17	0.37	0.8655	0.8655	1.731	173.1	0.0250086	6921.62	6.92162
6	1.804	1.843	2.234	2.608	3.309	0.039	0.391	0.374	0.701	0.97925	0.97925	1.9585	195.85	0.0383216	5110.7	5.1107
7	0.361	0.6	0.826	1.041	1.221	0.239	0.226	0.215	0.18	0.725	0.725	1.45	145	0.0297597	4872.36	4.87236		1mM JA
8	0.75	0.765	0.876	0.996	1.145	0.015	0.111	0.12	0.149	0.28325	0.28325	0.5665	56.65	0.0252561	2243.03	2.24303
9	0.275	0.405	0.509	0.603	0.688	0.13	0.104	0.094	0.085	0.34925	0.34925	0.6985	69.85	0.0226826	3079.46	3.07946
10	0.22	0.302	0.381	0.446	0.504	2.198	0.079	0.065	0.058	2.3565	2.3565	4.713	471.3	0.025553	18444	18.444		Aphid
11	0.913	1.604	2.557	3.035	3.184	1.599	0.953	0.478	0.149	3.06725	3.06725	6.1345	613.45	0.0308485	19885.9	19.8859
12	0.937	1.389	1.795	2.146	2.443	1.938	0.406	0.351	0.297	2.76925	2.76925	5.5385	553.85	0.0291163	19022	19.022
13	0.93	1.678	2.355	2.934	3.197	0.748	0.677	0.579	0.263	2.06975	2.06975	4.1395	413.95	0.0259489	15952.5	15.9525		0.1mM+aphid
14	0.503	0.794	0.999	1.568	2.532	0.291	0.205	0.569	0.964	1.306	1.306	2.612	261.2	0.0233259	11197.8	11.1978
15	0.267	0.735	0.975	1.203	1.427	0.468	0.24	0.228	0.224	0.992	0.992	1.984	198.4	0.0258994	7660.4	7.6604
16	0.433	0.667	0.923	1.171	1.395	0.234	0.256	0.248	0.224	0.794	0.794	1.588	158.8	0.0288689	5500.73	5.50073		1mMJA+aphid
17	0.232	0.697	0.949	1.489	1.921	0.465	0.252	0.54	0.432	1.365	1.365	2.73	273	0.0383216	7123.93	7.12393
18	0.292	0.529	0.856	1.573	2.173	0.237	0.327	0.717	0.6	1.431	1.431	2.862	286.2	0.0250086	11444.1	11.4441
19	0.222	0.308	0.387	0.449	0.504	0.086	0.079	0.062	0.055	0.24075	0.24075	0.4815	48.15	0.0250086	1925.34	1.92534		control v2
20	0.432	0.598	0.876	1.006	1.141	0.166	0.278	0.13	0.135	0.60775	0.60775	1.2155	121.55	0.0288689	4210.42	4.21042
21	0.951	1.136	1.494	1.798	1.876	0.185	0.358	0.304	0.078	0.8665	0.8665	1.733	173.3	0.0383216	4522.26	4.52226
22	0.491	0.908	1.274	1.586	1.853	0.417	0.366	0.312	0.267	1.16175	1.16175	2.3235	232.35	0.0383216	6063.17	6.06317		0.1mM JA
23	0.465	0.862	1.123	1.562	2.103	0.397	0.261	0.439	0.541	1.23225	1.23225	2.4645	246.45	0.0339664	7255.7	7.2557
24	0.502	0.883	1.254	1.542	1.884	0.381	0.371	0.288	0.342	1.1255	1.1255	2.251	225.1	0.0383216	5873.98	5.87398
25	0.75	0.765	0.876	0.996	1.145	0.015	0.111	0.12	0.149	0.28325	0.28325	0.5665	56.65	0.0250086	2265.22	2.26522		1mM JA
26	0.453	0.578	0.678	0.895	0.935	0.125	0.1	0.217	0.04	0.452	0.452	0.904	90.4	0.0193667	4667.81	4.66781
27	0.452	0.686	0.896	0.957	1.586	0.234	0.21	0.061	0.629	0.66225	0.66225	1.3245	132.45	0.0214453	6176.18	6.17618
28	1.443	2.232	2.904	3.289	3.463	0.789	0.672	0.385	0.174	1.8895	1.8895	3.779	377.9	0.0234744	16098.4	16.0984		Aphid
29	0.854	1.321	1.642	1.832	2.248	0.467	0.321	0.19	0.416	1.082	1.082	2.164	216.4	0.0211978	10208.6	10.2086
30	0.924	1.621	2.032	2.553	2.578	0.697	0.411	0.521	0.025	1.63525	1.63525	3.2705	327.05	0.0193172	16930.5	16.9305
31	0.349	0.712	0.955	1.286	1.605	0.363	0.243	0.331	0.319	1.01675	1.01675	2.0335	203.35	0.0273842	7425.83	7.42583		0.1mM+aphid
32	0.813	1.432	1.833	2.314	2.785	0.619	0.401	0.481	0.471	1.61875	1.61875	3.2375	323.75	0.0290668	11138.1	11.1381
33	0.625	1.014	1.356	1.684	1.975	0.389	0.342	0.328	0.291	1.13175	1.13175	2.2635	226.35	0.0433696	5219.09	5.21909
34	1.687	1.913	2.217	2.582	2.907	0.226	0.304	0.365	0.325	0.97625	0.97625	1.9525	195.25	0.0273842	7130.04	7.13004		1mMJA+aphid
35	0.969	1.912	2.615	3.099	3.418	0.943	0.703	0.484	0.319	2.20975	2.20975	4.4195	441.95	0.0250086	17671.9	17.6719
36	0.604	0.999	1.395	1.754	2.167	0.395	0.396	0.359	0.413	1.25325	1.25325	2.5065	250.65	0.0193667	12942.3	12.9423

## Sheet: POD 4
	0	30	60	90	120	30-0	60-30	90-60	120-90	Average	change in A/30 sec	change in A/1 min	Units/5µl sample	Pro(mg/5µl sample)	Units/mg Pro	Units/µg pro
1	0.296	0.345	0.456	0.499	0.523	0.049	0.111	0.043	0.024	0.209	0.209	0.418	41.8	0.0211978	1971.9	1.9719		control v1
2	1.643	1.654	1.659	1.659	1.663	0.011	0.005	0	0.004	0.017	0.017	0.034	3.4	0.0214453	158.543	0.158543
3	0.345	0.387	0.478	0.499	0.567	0.042	0.091	0.021	0.068	0.171	0.171	0.342	34.2	0.0339664	1006.88	1.00688
4	1.194	1.268	1.344	1.355	1.4618	0.074	0.076	0.011	0.1068	0.1877	0.1877	0.3754	37.54	0.0383216	979.605	0.979605		0.1mM JA
5	1.189	1.209	1.242	1.267	1.709	0.02	0.033	0.025	0.442	0.1885	0.1885	0.377	37.7	0.0250086	1507.48	1.50748
6	1.142	1.567	1.64	1.984	1.043	0.425	0.073	0.344	-0.941	0.60675	0.60675	1.2135	121.35	0.0383216	3166.62	3.16662
7	0.567	0.617	0.697	0.743	0.795	0.05	0.08	0.046	0.052	0.189	0.189	0.378	37.8	0.0297597	1270.17	1.27017		1mM JA
8	0.623	0.821	0.865	0.912	0.989	0.198	0.044	0.047	0.077	0.30825	0.30825	0.6165	61.65	0.0252561	2441	2.441
9	0.456	0.567	0.632	0.698	0.789	0.111	0.065	0.066	0.091	0.26475	0.26475	0.5295	52.95	0.0226826	2334.39	2.33439
10	2.177	2.672	3.032	3.119	3.294	2.198	0.36	0.087	0.175	2.68875	2.68875	5.3775	537.75	0.025553	21044.5	21.0445		Aphid
11	0.112	1.184	1.578	1.907	2.177	1.599	0.394	0.329	0.27	2.3895	2.3895	4.779	477.9	0.0308485	15491.8	15.4918
12	2.023	2.058	2.091	2.076	2.076	1.938	0.033	-0.015	0	1.956	1.956	3.912	391.2	0.0291163	13435.8	13.4358
13	1.018	1.453	1.678	1.954	2.531	0.435	0.225	0.276	0.577	1.08025	1.08025	2.1605	216.05	0.0259489	8325.97	8.32597		0.1mM+aphid
14	1.744	2.194	2.561	3.042	3.189	0.45	0.367	0.481	0.147	1.33475	1.33475	2.6695	266.95	0.0233259	11444.3	11.4443
15	0.345	0.502	0.641	0.769	0.89	0.157	0.139	0.128	0.121	0.45425	0.45425	0.9085	90.85	0.0258994	3507.8	3.5078
16	0.384	0.604	0.805	0.987	1.15	0.22	0.201	0.182	0.163	0.64375	0.64375	1.2875	128.75	0.0288689	4459.82	4.45982		1mMJA+aphid
17	0.451	0.668	0.949	1.191	1.432	0.217	0.281	0.242	0.241	0.80025	0.80025	1.6005	160.05	0.0383216	4176.5	4.1765
18	1.121	1.536	1.933	2.264	2.565	0.415	0.397	0.331	0.301	1.21825	1.21825	2.4365	243.65	0.0250086	9742.64	9.74264
19	0.723	0.786	0.854	0.954	1.004	0.063	0.068	0.1	0.05	0.2435	0.2435	0.487	48.7	0.0250086	1947.33	1.94733		control v2
20	0.991	1.111	1.312	1.464	1.679	0.12	0.201	0.152	0.215	0.52675	0.52675	1.0535	105.35	0.0288689	3649.26	3.64926
21	0.889	0.932	0.998	1.012	1.112	0.043	0.066	0.014	0.1	0.148	0.148	0.296	29.6	0.0383216	772.411	0.772411
22	0.854	0.932	1.122	1.212	1.268	0.078	0.19	0.09	0.056	0.372	0.372	0.744	74.4	0.0383216	1941.47	1.94147		0.1mM JA
23	1.927	1.973	2.112	2.178	2.213	0.046	0.139	0.066	0.035	0.25975	0.25975	0.5195	51.95	0.0339664	1529.45	1.52945
24	0.456	0.498	0.532	0.588	0.601	0.042	0.034	0.056	0.013	0.13525	0.13525	0.2705	27.05	0.0383216	705.869	0.705869
25	0.489	0.591	0.765	0.845	0.943	0.102	0.174	0.08	0.098	0.3805	0.3805	0.761	76.1	0.0250086	3042.95	3.04295		1mM JA
26	0.395	0.452	0.677	0.745	0.809	0.057	0.225	0.068	0.064	0.366	0.366	0.732	73.2	0.0193667	3779.68	3.77968
27	0.253	0.273	0.314	0.358	0.391	0.02	0.041	0.044	0.033	0.11325	0.11325	0.2265	22.65	0.0214453	1056.18	1.05618
28	0.218	0.939	1.257	1.574	1.794	0.721	0.318	0.317	0.22	1.411	1.411	2.822	282.2	0.0234744	12021.6	12.0216		Aphid
29	1.079	1.712	1.955	2.286	2.605	0.633	0.243	0.331	0.319	1.28675	1.28675	2.5735	257.35	0.0211978	12140.4	12.1404
30	0.691	1.183	1.576	1.907	2.171	0.492	0.393	0.331	0.264	1.282	1.282	2.564	256.4	0.0193172	13273.1	13.2731
31	0.452	0.686	0.896	0.957	1.586	0.234	0.21	0.061	0.629	0.66225	0.66225	1.3245	132.45	0.0273842	4836.74	4.83674		0.1mM+aphid
32	0.895	1.293	1.624	1.986	2.185	0.398	0.331	0.362	0.199	1.14075	1.14075	2.2815	228.15	0.0290668	7849.15	7.84915
33	1.132	2.055	2.718	3.102	3.253	0.923	0.663	0.384	0.151	2.00775	2.00775	4.0155	401.55	0.0433696	9258.79	9.25879
34	0.547	0.786	0.956	1.546	1.987	0.239	0.17	0.59	0.441	1.10925	1.10925	2.2185	221.85	0.0273842	8101.4	8.1014		1mMJA+aphid
35	0.778	1.118	1.543	1.927	2.018	0.34	0.425	0.384	0.091	1.17175	1.17175	2.3435	234.35	0.0250086	9370.77	9.37077
36	0.267	0.623	0.863	1.145	1.167	0.356	0.24	0.282	0.022	0.8835	0.8835	1.767	176.7	0.0193667	9123.91	9.12391

## Sheet: mean 1
						Borlaug2015 V1							Zincol2015 V2
	Units/µg pro					JA			JA+APHID						JA			JA+APHID
1	2.86822	control v1			CONTROL	0.1mM JA	1mM JA	Aphid	0.1mM+aphid	1mM+aphid				CONTROL	0.1mM JA	1mM JA	Aphid	0.1mM+aphid	1mM+aphid
2	2.83512			R1	2.86822	4.22739	5.65866	24.14	12.6036	9.92765			R1	2.45515	4.35003	5.96794	13.1761	11.7751	11.7751
3	1.79			R2	2.83512	2.45515	8.21189	14.3994	14.0209	8.94666			R2	0.904088	5.58788	8.00085	18.8486	7.84915	9.5647
4	4.22739	0.1mM JA		R3	1.79	3.36495	6.17214	18.6322	11.3091	9.5647			R3	3.36495	4.22739	6.26944	16.9305	9.19654	8.00085
5	2.45515			AVERAGE	2.49778	3.34916	6.6809	19.0572	12.6445	9.47967			AVERAGE	2.2414	4.72176	6.74608	16.3184	9.60692	9.7802
6	3.36495			SD	0.613175	0.886221	1.35051	4.88419	1.35634	0.495991			SD	1.24428	0.752577	1.09707	2.8854	1.99487	1.89631
7	5.65866	1mM JA		SE	0.354027	0.511675	0.779738	2.81997	0.783105	0.286369			SE	0.718405	0.434513	0.633412	1.66593	1.15177	1.09487
8	8.21189
9	6.17214
10	24.14	Aphid			Borlaug2015	zincol2015
11	14.3994			Control	2.49778	2.2414
12	18.6322			0.1 mM JA	3.94916	4.92176
13	12.6036	0.1mM+aphid		1 mM JA	6.6809	6.74608
14	14.0209			Aphid	17.0572	16.3184
15	11.3091			0.1 mM + aphid	12.6445	9.60692
16	9.92765	1mMJA+aphid		1 mM JA + aphid	9.47967	9.7802
17	8.94666
18	9.5647
19	2.45515	control v2		Control	0.354027	0.718405
20	0.904088			0.1 Mm JA	0.511675	0.434513
21	3.36495			1 mM JA	0.779738	0.633412
22	4.35003	0.1mM JA		Aphid	2.81997	1.66593
23	5.58788			0.1 mM + aphid	0.783105	1.15177
24	4.22739			1 mM JA + aphid	0.286369	1.09487
25	5.96794	1mM JA
26	8.00085
27	6.26944
28	13.1761	Aphid
29	18.8486
30	16.9305
31	11.7751	0.1mM+aphid
32	7.84915
33	9.19654
34	11.7751	1mMJA+aphid
35	9.5647
36	8.00085

## Sheet: mean 2
						Borlaug2015 V1							Zincol2015 V2
	Units/µg pro					JA			JA+APHID						JA			JA+APHID
1	2.46016	control v1			CONTROL	0.1mM JA	1mM JA	Aphid	0.1mM+aphid	1mM+aphid				CONTROL	0.1mM JA	1mM JA	Aphid	0.1mM+aphid	1mM+aphid
2	3.21049			R1	2.46016	2.63168	4.99215	23.3515	13.8002	6.87072			R1	3.31286	1.55396	5.5241	6.49005	5.00654	1.92082
3	4.22035			R2	3.21049	4.6584	1.69662	20.2149	6.06407	5.02224			R2	1.45832	3.74341	3.44664	18.8486	7.84915	9.27081
4	2.63168	0.1mM JA		R3	4.22035	3.48368	3.16763	19.0872	7.37854	5.47012			R3	2.0067	3.84379	2.58565	16.9305	9.19654	7.84078
5	4.6584			AVERAGE	3.297	3.59125	3.28547	20.8845	9.08093	5.78769			AVERAGE	2.25929	3.04705	3.85213	14.0897	7.35074	6.34413
6	3.48368			SD	0.883279	1.01763	1.65092	2.20957	4.1395	0.964295			SD	0.952723	1.29403	1.51061	6.65102	2.139	3.89686
7	4.99215	1mM JA		SE	0.509976	0.587547	0.953189	1.27573	2.39001	0.556752			SE	0.550071	0.747131	0.872175	3.84008	1.23499	2.24992
8	1.69662				Borlaug2015	zincol2015
9	3.16763			Control	3.297	2.25929
10	23.3515	Aphid		0.1 Mm JA	3.59125	3.04705
11	20.2149			1 mM JA	3.28547	3.85213
12	19.0872			Aphid	20.8845	14.0897
13	13.8002	0.1mM+aphid		0.1 mM + aphid	9.08093	7.35074
14	6.06407			1 mM JA + aphid	5.78769	6.34413
15	7.37854
16	6.87072	1mMJA+aphid
17	5.02224			Control	0.509976	0.550071
18	5.47012			0.1 Mm JA	0.587547	0.747131
19	3.31286	control v2		1 mM JA	0.953189	0.872175
20	1.45832			Aphid	1.27573	3.84008
21	2.0067			0.1 mM + aphid	2.39001	1.23499
22	1.55396	0.1mM JA		1 mM JA + aphid	0.556752	2.24992
23	3.74341
24	3.84379
25	5.5241	1mM JA
26	3.44664
27	2.58565
28	6.49005	Aphid
29	18.8486
30	16.9305
31	5.00654	0.1mM+aphid
32	7.84915
33	9.19654
34	1.92082	1mMJA+aphid
35	9.27081
36	7.84078

## Sheet: mean 3
						Borlaug2015 V1							Zincol2015 V2
	Units/µg pro					JA			JA+APHID						JA			JA+APHID
1	4.62783	control v1			CONTROL	0.1mM JA	1mM JA	Aphid	0.1mM+aphid	1mM+aphid				CONTROL	0.1mM JA	1mM JA	Aphid	0.1mM+aphid	1mM+aphid
2	1.71599			R1	4.62783	7.77239	4.87236	18.444	15.9525	5.50073			R1	1.92534	6.06317	2.26522	16.0984	7.42583	7.13004
3	1.19383			R2	1.71599	6.92162	2.24303	19.8859	11.1978	7.12393			R2	4.21042	7.2557	4.66781	10.2086	11.1381	17.6719
4	7.77239	0.1mM JA		R3	1.19383	5.1107	3.07946	19.022	7.6604	11.4441			R3	4.52226	5.87398	6.17618	16.9305	5.21909	12.9423
5	6.92162			AVERAGE	2.51255	6.60157	3.39828	19.1173	11.6036	8.02291			AVERAGE	3.55267	6.39762	4.36974	14.4125	7.92768	12.5814
6	5.1107			SD	1.8504	1.3594	1.34335	0.725654	4.16091	3.07195			SD	1.41791	0.74912	1.97244	3.66439	2.99126	5.2802
7	4.87236	1mM JA		SE	1.06836	0.784873	0.775606	0.418969	2.40237	1.77364			SE	0.818656	0.432518	1.13882	2.1157	1.72705	3.04861
8	2.24303
9	3.07946
10	18.444	Aphid			Borlaug2015	zincol2015
11	19.8859			Control	2.51255	3.55267
12	19.022			0.1 Mm JA	6.60157	6.39762
13	15.9525	0.1mM+aphid		1 mM JA	3.39828	4.36974
14	11.1978			Aphid	19.1173	14.4125
15	7.6604			0.1 mM + aphid	11.6036	7.92768
16	5.50073	1mMJA+aphid		1 mM JA + aphid	8.02291	12.5814
17	7.12393
18	11.4441
19	1.92534	control v2		Control	1.06836	0.818656
20	4.21042			0.1 Mm JA	0.784873	0.432518
21	4.52226			1 mM JA	0.775606	1.13882
22	6.06317	0.1mM JA		Aphid	0.418969	2.1157
23	7.2557			0.1 mM + aphid	2.40237	1.72705
24	5.87398			1 mM JA + aphid	1.77364	3.04861
25	2.26522	1mM JA
26	4.66781
27	6.17618
28	16.0984	Aphid
29	10.2086
30	16.9305
31	7.42583	0.1mM+aphid
32	11.1381
33	5.21909
34	7.13004	1mMJA+aphid
35	17.6719
36	12.9423

## Sheet: mean 4
						Borlaug2015 V1							Zincol2015 V2
	Units/µg pro					JA			JA+APHID						JA			JA+APHID
1	1.9719	control v1			CONTROL	0.1mM JA	1mM JA	Aphid	0.1mM+aphid	1mM+aphid				CONTROL	0.1mM JA	1mM JA	Aphid	0.1mM+aphid	1mM+aphid
2	0.158543			R1	1.9719	0.979605	1.27017	21.0445	8.32597	4.45982			R1	1.94733	1.94147	3.04295	12.0216	4.83674	8.1014
3	1.00688			R2	0.158543	1.50748	2.441	15.4918	11.4443	4.1765			R2	3.64926	1.52945	3.77968	12.1404	7.84915	9.37077
4	0.979605	0.1mM JA		R3	1.00688	3.16662	2.33439	13.4358	3.5078	9.74264			R3	0.772411	0.705869	1.05618	13.2731	9.25879	9.12391
5	1.50748			AVERAGE	1.04577	1.88457	2.01519	16.6574	7.75937	6.12632			AVERAGE	2.123	1.39226	2.62627	12.4784	7.31489	8.86536
6	3.16662			SD	0.907303	1.14123	0.647399	3.93599	3.99849	3.13503			SD	1.44645	0.629119	1.40876	0.690844	2.25892	0.673025
7	1.27017	1mM JA		SE	0.523847	0.65891	0.373787	2.27251	2.3086	1.81006			SE	0.835131	0.363233	0.813369	0.398871	1.30423	0.388582
8	2.441
9	2.33439				Borlaug2015	zincol2015
10	21.0445	Aphid		Control	4.36457	5.41234
11	15.4918			0.1 mM JA	4.98457	6.22626
12	13.4358			1 mM JA	5.41519	6.82627
13	8.32597	0.1mM+aphid		Aphid	2.98333	3.87453
14	11.4443			0.1 mM + aphid	7.75937	8.44894
15	3.5078			1 mM JA + aphid	8.63216	9.30561
16	4.45982	1mMJA+aphid
17	4.1765
18	9.74264			Control	0.523847	0.835131
19	1.94733	control v2		0.1 Mm JA	0.65891	0.363233
20	3.64926			1 mM JA	0.373787	0.813369
21	0.772411			Aphid	2.27251	0.398871
22	1.94147	0.1mM JA		0.1 mM + aphid	2.3086	1.30423
23	1.52945			1 mM JA + aphid	1.81006	0.388582
24	0.705869
25	3.04295	1mM JA
26	3.77968
27	1.05618
28	12.0216	Aphid
29	12.1404
30	13.2731
31	4.83674	0.1mM+aphid
32	7.84915
33	9.25879
34	8.1014	1mMJA+aphid
35	9.37077
36	9.12391
