# Supplementary material for: Exploring the effect of Jasmonic Acid for Aphids control for improving the yield of Triticum aestivum varieties
Source: PeerJ. 2022 Oct 27;10:e14018. doi: 10.7717/peerj.14018 (PMC9618260; doi:10.7717/peerj.14018)
Supplement: Supplemental Information 6 [file peerj-10-14018-s006.xls]

## Sheet: CAT 1
	1 CAT 0	30	60	90	120	0-30	30-60	60-90	90-120	Average	chnge in Abs/30sec	chnge in Abs/min	mg pro/ml		Units/mg pro
1	0.786	0.781	0.751	0.764	0.767	0.005	0.03	-0.013	-0.003	0.00475	0.00475	0.0095	4.40784	192.182	0.00494324	0.494324	control v1
2	1.891	1.89	1.884	1.882	1.879	0.001	0.006	0.002	0.003	0.003	0.003	0.006	4.45733	194.339	0.00308738	0.308738
3	0.987	0.981	0.977	0.978	0.979	0.006	0.004	-0.001	-0.001	0.002	0.002	0.004	4.32865	188.729	0.00211944	0.211944
4	0.661	0.624	0.602	0.58	0.572	0.037	0.022	0.022	0.008	0.02225	0.02225	0.0445	4.39794	191.75	0.0232073	2.32073	0.1mM JA
5	0.663	0.654	0.634	0.631	0.621	0.009	0.02	0.003	0.01	0.0105	0.0105	0.021	4.20987	183.551	0.011441	1.1441
6	0.592	0.584	0.581	0.571	0.565	0.008	0.003	0.01	0.006	0.00675	0.00675	0.0135	4.29896	187.435	0.00720251	0.720251
7	0.451	0.367	0.316	0.309	0.301	0.084	0.051	0.007	0.008	0.0375	0.0375	0.075	4.45733	194.339	0.0385923	3.85923	1mM JA
8	0.463	0.486	0.451	0.423	0.411	-0.023	0.035	0.028	0.012	0.013	0.013	0.026	4.32205	188.442	0.0137974	1.37974
9	0.492	0.452	0.423	0.401	0.396	0.04	0.029	0.022	0.005	0.024	0.024	0.048	4.43753	193.476	0.0248092	2.48092
10	1.149	1.121	1.112	1.107	1.101	0.028	0.009	0.005	0.006	0.012	0.012	0.024	4.21977	183.982	0.0130447	1.30447	Aphid
11	1.342	1.311	1.289	1.285	1.273	0.031	0.022	0.004	0.012	0.01725	0.01725	0.0345	4.47712	195.203	0.0176739	1.76739
12	0.921	0.918	0.814	0.813	0.813	0.003	0.104	0.001	0	0.027	0.027	0.054	4.37814	190.887	0.028289	2.8289
13	0.961	0.924	0.902	0.88	0.872	0.037	0.022	0.022	0.008	0.02225	0.02225	0.0445	4.56621	199.087	0.0223521	2.23521	0.1mM+aphid
14	0.667	0.664	0.662	0.659	0.658	0.003	0.002	0.003	0.001	0.00225	0.00225	0.0045	4.45733	194.339	0.00231554	0.231554
15	0.588	0.587	0.584	0.582	0.58	0.001	0.003	0.002	0.002	0.002	0.002	0.004	4.48702	195.634	0.00204463	0.204463
16	0.348	0.336	0.331	0.332	0.33	0.012	0.005	-0.001	0.002	0.0045	0.0045	0.009	4.50352	196.353	0.00458357	0.458357	1mMJA+aphid
17	0.886	0.884	0.884	0.881	0.878	0.002	0	0.003	0.003	0.002	0.002	0.004	4.33855	189.161	0.0021146	0.21146
18	0.875	0.869	0.865	0.854	0.85	0.006	0.004	0.011	0.004	0.00625	0.00625	0.0125	4.19998	183.119	0.00682616	0.682616
19	0.914	0.911	0.912	0.898	0.885	0.003	-0.001	0.014	0.013	0.00725	0.00725	0.0145	5.15019	224.548	0.0064574	0.64574	control v2
20	0.862	0.856	0.854	0.834	0.832	0.006	0.002	0.02	0.002	0.0075	0.0075	0.015	4.56291	198.943	0.00753986	0.753986
21	1.048	1.046	1.032	1.024	1.018	0.002	0.014	0.008	0.006	0.0075	0.0075	0.015	5.52632	240.948	0.00622542	0.622542
22	0.974	0.908	0.843	0.796	0.778	0.066	0.065	0.047	0.018	0.049	0.049	0.098	4.21977	183.982	0.0532661	5.32661	0.1mM JA
23	0.843	0.801	0.877	0.896	0.831	0.042	-0.076	-0.019	0.065	0.003	0.003	0.006	5.1403	224.117	0.00267717	0.267717
24	0.745	0.741	0.739	0.732	0.728	0.004	0.002	0.007	0.004	0.00425	0.00425	0.0085	4.96213	216.349	0.00392884	0.392884
25	0.585	0.488	0.479	0.446	0.402	0.097	0.009	0.033	0.044	0.04575	0.04575	0.0915	4.51672	196.929	0.0464635	4.64635	1mM JA
26	0.716	0.701	0.695	0.688	0.684	0.015	0.006	0.007	0.004	0.008	0.008	0.016	4.12079	179.667	0.00890539	0.890539
27	0.761	0.758	0.754	0.751	0.749	0.003	0.004	0.003	0.002	0.003	0.003	0.006	4.04161	176.214	0.00340495	0.340495
28	0.938	0.936	0.953	0.943	0.862	0.002	-0.017	0.01	0.081	0.019	0.019	0.038	4.22637	184.27	0.0206219	2.06219	Aphid
29	1.562	1.467	1.463	1.443	1.424	0.095	0.004	0.02	0.019	0.0345	0.0345	0.069	4.16038	181.393	0.038039	3.8039
30	0.346	0.348	0.342	0.341	0.341	-0.002	0.006	0.001	0	0.00125	0.00125	0.0025	4.00201	174.488	0.00143276	0.143276
31	0.843	0.801	0.877	0.896	0.831	0.042	-0.076	-0.019	0.065	0.003	0.003	0.006	4.14059	180.53	0.00332355	0.332355	0.1mM+aphid
32	0.745	0.741	0.739	0.732	0.728	0.004	0.002	0.007	0.004	0.00425	0.00425	0.0085	4.101	178.803	0.00475382	0.475382
33	0.585	0.588	0.589	0.576	0.574	-0.003	-0.001	0.013	0.002	0.00275	0.00275	0.0055	4.0515	176.646	0.00311358	0.311358
34	0.289	0.287	0.289	0.281	0.28	0.002	-0.002	0.008	0.001	0.00225	0.00225	0.0045	4.0911	178.372	0.00252282	0.252282	1mMJA+aphid
35	0.862	0.885	0.868	0.855	0.858	-0.023	0.017	0.013	-0.003	0.001	0.001	0.002	4.04161	176.214	0.00113498	0.113498
36	0.934	0.933	0.943	0.926	0.927	0.001	-0.01	0.017	-0.001	0.00175	0.00175	0.0035	4.0614	177.077	0.00197654	0.197654
37	0	0	0	0	0	0	0	0	0	0	0	0	4.01191	174.919	0	0
38	0	0	0	0	0	0	0	0	0	0	0	0	4.00201	174.488	0	0
39	0	0	0	0	0	0	0	0	0	0	0	0	4.35835	190.024	0	0
40	0	0	0	0	0	0	0	0	0	0	0	0	4.12409	179.81	0	0
41	0	0	0	0	0	0	0	0	0	0	0	0	4.04161	176.214	0	0
42	0	0	0	0	0	0	0	0	0	0	0	0	4.27916	186.571	0	0
43	0	0	0	0	0	0	0	0	0	0	0	0	4.12079	179.667	0	0
44	0	0	0	0	0	0	0	0	0	0	0	0	4.14719	180.817	0	0
45	0	0	0	0	0	0	0	0	0	0	0	0	4.23957	184.845	0	0
46	0	0	0	0	0	0	0	0	0	0	0	0	4.25937	185.708	0	0
47	0	0	0	0	0	0	0	0	0	0	0	0	4.19008	182.687	0	0
48	0	0	0	0	0	0	0	0	0	0	0	0	4.22967	184.414	0	0
	0	0	0	0	0	0	0	0	0	0	0	0	4.20987	183.551	0	0
	0	0	0	0	0	0	0	0	0	0	0	0	4.23957	184.845	0	0
	0	0	0	0	0	0	0	0	0	0	0	0	4.31875	188.298	0	0
	0	0	0	0	0	0	0	0	0	0	0	0	4.25607	185.564	0	0
	0	0	0	0	0	0	0	0	0	0	0	0	3.98222	173.625	0	0
	0	0	0	0	0	0	0	0	0	0	0	0	4.35835	190.024	0	0
	0	0	0	0	0	0	0	0	0	0	0	0	4.02181	175.351	0	0
	0	0	0	0	0	0	0	0	0	0	0	0	4.12079	179.667	0	0
	0	0	0	0	0	0	0	0	0	0	0	0	3.99212	174.056	0	0
	0	0	0	0	0	0	0	0	0	0	0	0	3.96242	172.762	0	0
	0	0	0	0	0	0	0	0	0	0	0	0	3.67538	160.246	0	0
	0	0	0	0	0	0	0	0	0	0	0	0	3.87664	169.021	0	0
	0	0	0	0	0	0	0	0	0	0	0	0	4.12079	179.667	0	0
	0	0	0	0	0	0	0	0	0	0	0	0	3.99212	174.056	0	0
	0	0	0	0	0	0	0	0	0	0	0	0	4.03171	175.783	0	0
	0	0	0	0	0	0	0	0	0	0	0	0	4.04821	176.502	0	0
	0	0	0	0	0	0	0	0	0	0	0	0	4.00201	174.488	0	0
	0	0	0	0	0	0	0	0	0	0	0	0	4.0614	177.077	0	0
	0	0	0	0	0	0	0	0	0	0	0	0	4.47712	195.203	0	0
	0	0	0	0	0	0	0	0	0	0	0	0	4.18018	182.256	0	0
	0	0	0	0	0	0	0	0	0	0	0	0	3.99212	174.056	0	0
	0	0	0	0	0	0	0	0	0	0	0	0	3.68528	160.678	0	0
	0	0	0	0	0	0	0	0	0	0	0	0	3.36854	146.868	0	0
	0	0	0	0	0	0	0	0	0	0	0	0	3.68198	160.534	0	0
	0	0	0	0	0	0	0	0	0	0	0	0	3.39823	148.163	0	0
	0	0	0	0	0	0	0	0	0	0	0	0	3.10129	135.216	0	0
	0	0	0	0	0	0	0	0	0	0	0	0	4.101	178.803	0	0
	0	0	0	0	0	0	0	0	0	0	0	0	3.5335	154.061	0	0
	0	0	0	0	0	0	0	0	0	0	0	0	4.17028	181.824	0	0
	0	0	0	0	0	0	0	0	0	0	0	0	3.66548	159.815	0	0
	0	0	0	0	0	0	0	0	0	0	0	0	3.27945	142.984	0	0
	0	0	0	0	0	0	0	0	0	0	0	0	3.70507	161.541	0	0
	0	0	0	0	0	0	0	0	0	0	0	0	3.25966	142.121	0	0
	0	0	0	0	0	0	0	0	0	0	0	0	3.28935	143.416	0	0
	0	0	0	0	0	0	0	0	0	0	0	0	2.87363	125.29	0	0
	0	0	0	0	0	0	0	0	0	0	0	0	3.14088	136.942	0	0
	0	0	0	0	0	0	0	0	0	0	0	0	3.32894	145.142	0	0
	0	0	0	0	0	0	0	0	0	0	0	0	3.24976	141.689	0	0
	0	0	0	0	0	0	0	0	0	0	0	0	3.26956	142.553	0	0
	0	0	0	0	0	0	0	0	0	0	0	0	3.28275	143.128	0	0
	0	0	0	0	0	0	0	0	0	0	0	0	3.31905	144.71	0	0
	0	0	0	0	0	0	0	0	0	0	0	0	2.86373	124.859	0	0
	0	0	0	0	0	0	0	0	0	0	0	0	3.25966	142.121	0	0
	0	0	0	0	0	0	0	0	0	0	0	0	3.14748	137.23	0	0
	0	0	0	0	0	0	0	0	0	0	0	0	3.22006	140.395	0	0
	0	0	0	0	0	0	0	0	0	0	0	0	3.32894	145.142	0	0
	0	0	0	0	0	0	0	0	0	0	0	0	3.20027	139.532	0	0
	0	0	0	0	0	0	0	0	0	0	0	0	3.24976	141.689	0	0
	0	0	0	0	0	0	0	0	0	0	0	0	3.15078	137.374	0	0
	0	0	0	0	0	0	0	0	0	0	0	0	2.88353	125.722	0	0
	0	0	0	0	0	0	0	0	0	0	0	0	3.20027	139.532	0	0
	0	0	0	0	0	0	0	0	0	0	0	0	3.07819	134.209	0	0
	0	0	0	0	0	0	0	0	0	0	0	0	3.17057	138.237	0	0
	0	0	0	0	0	0	0	0	0	0	0	0	3.06169	133.49	0	0
	0	0	0	0	0	0	0	0	0	0	0	0	3.14088	136.942	0	0
	0	0	0	0	0	0	0	0	0	0	0	0	3.12438	136.223	0	0
	0	0	0	0	0	0	0	0	0	0	0	0	3.24976	141.689	0	0
	0	0	0	0	0	0	0	0	0	0	0	0	3.26956	142.553	0	0
	0	0	0	0	0	0	0	0	0	0	0	0	3.22006	140.395	0	0
	0	0	0	0	0	0	0	0	0	0	0	0	3.24646	141.546	0	0
	0	0	0	0	0	0	0	0	0	0	0	0	3.17057	138.237	0	0
	0	0	0	0	0	0	0	0	0	0	0	0	3.24976	141.689	0	0
	0	0	0	0	0	0	0	0	0	0	0	0	2.98251	130.037	0	0
	0	0	0	0	0	0	0	0	0	0	0	0	3.13428	136.655	0	0
	0	0	0	0	0	0	0	0	0	0	0	0	2.74496	119.68	0	0
	0	0	0	0	0	0	0	0	0	0	0	0	3.16068	137.805	0	0
	0	0	0	0	0	0	0	0	0	0	0	0	2.78455	121.406	0	0
	0	0	0	0	0	0	0	0	0	0	0	0	2.89673	126.297	0	0
	0	0	0	0	0	0	0	0	0	0	0	0	3.15078	137.374	0	0
	0	0	0	0	0	0	0	0	0	0	0	0	2.95282	128.743	0	0
	0	0	0	0	0	0	0	0	0	0	0	0	2.98251	130.037	0	0
	0	0	0	0	0	0	0	0	0	0	0	0	3.0287	132.051	0	0
	0	0	0	0	0	0	0	0	0	0	0	0	3.19037	139.1	0	0
	0	0	0	0	0	0	0	0	0	0	0	0	3.032	132.195	0	0
	0	0	0	0	0	0	0	0	0	0	0	0	3.20027	139.532	0	0
	0	0	0	0	0	0	0	0	0	0	0	0	3.14088	136.942	0	0
	0	0	0	0	0	0	0	0	0	0	0	0	3.0221	131.764	0	0
	0	0	0	0	0	0	0	0	0	0	0	0	2.89343	126.153	0	0
	0	0	0	0	0	0	0	0	0	0	0	0	3.0419	132.627	0	0
	0	0	0	0	0	0	0	0	0	0	0	0	2.98581	130.181	0	0
	0	0	0	0	0	0	0	0	0	0	0	0	4.34845	189.592	0	0
	0	0	0	0	0	0	0	0	0	0	0	0	4.43753	193.476	0	0
	0	0	0	0	0	0	0	0	0	0	0	0	4.39299	191.534	0	0
	0	0	0	0	0	0	0	0	0	0	0	0	4.41526	192.505	0	0
	0	0	0	0	0	0	0	0	0	0	0	0	4.40784	192.182	0	0
	0	0	0	0	0	0	0	0	0	0	0	0	3.73477	162.836	0	0
	0	0	0	0	0	0	0	0	0	0	0	0	4.0713	177.509	0	0
	0	0	0	0	0	0	0	0	0	0	0	0	3.90303	170.172	0	0
	0	0	0	0	0	0	0	0	0	0	0	0	4.32865	188.729	0	0
	0	0	0	0	0	0	0	0	0	0	0	0	4.35835	190.024	0	0
	0	0	0	0	0	0	0	0	0	0	0	0	4.3435	189.377	0	0
	0	0	0	0	0	0	0	0	0	0	0	0	4.35092	189.7	0	0
	0	0	0	0	0	0	0	0	0	0	0	0	4.38804	191.319	0	0
	0	0	0	0	0	0	0	0	0	0	0	0	4.16038	181.393	0	0
	0	0	0	0	0	0	0	0	0	0	0	0	4.27421	186.356	0	0
	0	0	0	0	0	0	0	0	0	0	0	0	4.2173	183.874	0	0
	0	0	0	0	0	0	0	0	0	0	0	0	3.66548	159.815	0	0
	0	0	0	0	0	0	0	0	0	0	0	0	4.11089	179.235	0	0
	0	0	0	0	0	0	0	0	0	0	0	0	3.88819	169.525	0	0
	0	0	0	0	0	0	0	0	0	0	0	0	3.99954	174.38	0	0
	0	0	0	0	0	0	0	0	0	0	0	0	4.33855	189.161	0	0
	0	0	0	0	0	0	0	0	0	0	0	0	3.37843	147.3	0	0
	0	0	0	0	0	0	0	0	0	0	0	0	3.85849	168.23	0	0
	0	0	0	0	0	0	0	0	0	0	0	0	3.61846	157.765	0	0
	0	0	0	0	0	0	0	0	0	0	0	0	3.36854	146.868	0	0
	0	0	0	0	0	0	0	0	0	0	0	0	3.93273	171.467	0	0
	0	0	0	0	0	0	0	0	0	0	0	0	3.65063	159.168	0	0
	0	0	0	0	0	0	0	0	0	0	0	0	3.79168	165.317	0	0
	0	0	0	0	0	0	0	0	0	0	0	0	3.77436	164.562	0	0
	0	0	0	0	0	0	0	0	0	0	0	0	3.36854	146.868	0	0
	0	0	0	0	0	0	0	0	0	0	0	0	3.57145	155.715	0	0
	0	0	0	0	0	0	0	0	0	0	0	0	3.46999	151.292	0	0
	0	0	0	0	0	0	0	0	0	0	0	0	3.33884	145.574	0	0
	0	0	0	0	0	0	0	0	0	0	0	0	3.25966	142.121	0	0
	0	0	0	0	0	0	0	0	0	0	0	0	3.29925	143.847	0	0
	0	0	0	0	0	0	0	0	0	0	0	0	3.27945	142.984	0	0
	0	0	0	0	0	0	0	0	0	0	0	0	3.21017	139.963	0	0
	0	0	0	0	0	0	0	0	0	0	0	0	2.74496	119.68	0	0
	0	0	0	0	0	0	0	0	0	0	0	0	2.97756	129.822	0	0
	0	0	0	0	0	0	0	0	0	0	0	0	2.86126	124.751	0	0
	0	0	0	0	0	0	0	0	0	0	0	0	2.75485	120.112	0	0
	0	0	0	0	0	0	0	0	0	0	0	0	3.44772	150.321	0	0
	0	0	0	0	0	0	0	0	0	0	0	0	3.10129	135.216	0	0
	0	0	0	0	0	0	0	0	0	0	0	0	3.2745	142.768	0	0
	0	0	0	0	0	0	0	0	0	0	0	0	3.39823	148.163	0	0
	0	0	0	0	0	0	0	0	0	0	0	0	3.42792	149.458	0	0
	0	0	0	0	0	0	0	0	0	0	0	0	3.41308	148.81	0	0
	0	0	0	0	0	0	0	0	0	0	0	0	3.4205	149.134	0	0
	0	0	0	0	0	0	0	0	0	0	0	0	2.88353	125.722	0	0
	0	0	0	0	0	0	0	0	0	0	0	0	2.75485	120.112	0	0
	0	0	0	0	0	0	0	0	0	0	0	0	2.81919	122.917	0	0
	0	0	0	0	0	0	0	0	0	0	0	0	2.78702	121.514	0	0
	0	0	0	0	0	0	0	0	0	0	0	0	2.77465	120.975	0	0
	0	0	0	0	0	0	0	0	0	0	0	0	2.56679	111.912	0	0
	0	0	0	0	0	0	0	0	0	0	0	0	2.67072	116.443	0	0
	0	0	0	0	0	0	0	0	0	0	0	0	2.61876	114.178	0	0
	0	0	0	0	0	0	0	0	0	0	0	0	2.70536	117.954	0	0
	0	0	0	0	0	0	0	0	0	0	0	0	3.34874	146.005	0	0
	0	0	0	0	0	0	0	0	0	0	0	0	3.02705	131.979	0	0
	0	0	0	0	0	0	0	0	0	0	0	0	3.1879	138.992	0	0
	0	0	0	0	0	0	0	0	0	0	0	0	3.43782	149.889	0	0
	0	0	0	0	0	0	0	0	0	0	0	0	2.73506	119.249	0	0
	0	0	0	0	0	0	0	0	0	0	0	0	3.08644	134.569	0	0
	0	0	0	0	0	0	0	0	0	0	0	0	2.91075	126.909	0	0
	0	0	0	0	0	0	0	0	0	0	0	0	3.58629	156.362	0	0
	0	0	0	0	0	0	0	0	0	0	0	0	3.63578	158.52	0	0
	0	0	0	0	0	0	0	0	0	0	0	0	3.61104	157.441	0	0
	0	0	0	0	0	0	0	0	0	0	0	0	3.62341	157.981	0	0
	0	0	0	0	0	0	0	0	0	0	0	0	4.50682	196.497	0	0
	0	0	0	0	0	0	0	0	0	0	0	0	4.53651	197.792	0	0
	0	0	0	0	0	0	0	0	0	0	0	0	4.52166	197.145	0	0
	0	0	0	0	0	0	0	0	0	0	0	0	4.52909	197.468	0	0
	0	0	0	0	0	0	0	0	0	0	0	0	4.22967	184.414	0	0
	0	0	0	0	0	0	0	0	0	0	0	0	3.66548	159.815	0	0
	0	0	0	0	0	0	0	0	0	0	0	0	3.94757	172.114	0	0
	0	0	0	0	0	0	0	0	0	0	0	0	3.80653	165.965	0	0
	0	0	0	0	0	0	0	0	0	0	0	0	4.26926	186.14	0	0
	0	0	0	0	0	0	0	0	0	0	0	0	4.93244	215.054	0	0
	0	0	0	0	0	0	0	0	0	0	0	0	4.60085	200.597	0	0
	0	0	0	0	0	0	0	0	0	0	0	0	4.76664	207.826	0	0
	0	0	0	0	0	0	0	0	0	0	0	0	3.46752	151.184	0	0
	0	0	0	0	0	0	0	0	0	0	0	0	3.49721	152.478	0	0
	0	0	0	0	0	0	0	0	0	0	0	0	3.48236	151.831	0	0
	0	0	0	0	0	0	0	0	0	0	0	0	3.48979	152.155	0	0
	0	0	0	0	0	0	0	0	0	0	0	0	4.01191	174.919	0	0
	0	0	0	0	0	0	0	0	0	0	0	0	3.5368	154.205	0	0
	0	0	0	0	0	0	0	0	0	0	0	0	3.77436	164.562	0	0
	0	0	0	0	0	0	0	0	0	0	0	0	3.65558	159.383	0	0
	0	0	0	0	0	0	0	0	0	0	0	0	4.11089	179.235	0	0
	0	0	0	0	0	0	0	0	0	0	0	0	3.44772	150.321	0	0
	0	0	0	0	0	0	0	0	0	0	0	0	3.77931	164.778	0	0
	0	0	0	0	0	0	0	0	0	0	0	0	3.61351	157.549	0	0
	0	0	0	0	0	0	0	0	0	0	0	0	3.46752	151.184	0	0
	0	0	0	0	0	0	0	0	0	0	0	0	3.5467	154.636	0	0
	0	0	0	0	0	0	0	0	0	0	0	0	3.50711	152.91	0	0
	0	0	0	0	0	0	0	0	0	0	0	0	3.52691	153.773	0	0
	0	0	0	0	0	0	0	0	0	0	0	0	3.5665	155.499	0	0
	0	0	0	0	0	0	0	0	0	0	0	0	3.44772	150.321	0	0
	0	0	0	0	0	0	0	0	0	0	0	0	3.50711	152.91	0	0
	0	0	0	0	0	0	0	0	0	0	0	0	3.47742	151.615	0	0
	0	0	0	0	0	0	0	0	0	0	0	0	3.52691	153.773	0	0
	0	0	0	0	0	0	0	0	0	0	0	0	3.15078	137.374	0	0
	0	0	0	0	0	0	0	0	0	0	0	0	3.33884	145.574	0	0
	0	0	0	0	0	0	0	0	0	0	0	0	3.24481	141.474	0	0
	0	0	0	0	0	0	0	0	0	0	0	0	3.47742	151.615	0	0
	0	0	0	0	0	0	0	0	0	0	0	0	3.26956	142.553	0	0
	0	0	0	0	0	0	0	0	0	0	0	0	3.37349	147.084	0	0
	0	0	0	0	0	0	0	0	0	0	0	0	3.32152	144.818	0	0
	0	0	0	0	0	0	0	0	0	0	0	0	3.36854	146.868	0	0
	0	0	0	0	0	0	0	0	0	0	0	0	3.44772	150.321	0	0
	0	0	0	0	0	0	0	0	0	0	0	0	3.40813	148.594	0	0
	0	0	0	0	0	0	0	0	0	0	0	0	3.42792	149.458	0	0
	0	0	0	0	0	0	0	0	0	0	0	0	2.63608	114.933	0	0
	0	0	0	0	0	0	0	0	0	0	0	0	2.67567	116.659	0	0
	0	0	0	0	0	0	0	0	0	0	0	0	2.65587	115.796	0	0
	0	0	0	0	0	0	0	0	0	0	0	0	2.66577	116.228	0	0
	0	0	0	0	0	0	0	0	0	0	0	0	3.47742	151.615	0	0
	0	0	0	0	0	0	0	0	0	0	0	0	2.69547	117.522	0	0
	0	0	0	0	0	0	0	0	0	0	0	0	3.08644	134.569	0	0
	0	0	0	0	0	0	0	0	0	0	0	0	2.89095	126.046	0	0
	0	0	0	0	0	0	0	0	0	0	0	0	2.85383	124.427	0	0
	0	0	0	0	0	0	0	0	0	0	0	0	2.75485	120.112	0	0
	0	0	0	0	0	0	0	0	0	0	0	0	2.80434	122.269	0	0
	0	0	0	0	0	0	0	0	0	0	0	0	2.7796	121.191	0	0
	0	0	0	0	0	0	0	0	0	0	0	0	2.57669	112.344	0	0
	0	0	0	0	0	0	0	0	0	0	0	0	3.63578	158.52	0	0
	0	0	0	0	0	0	0	0	0	0	0	0	3.10624	135.432	0	0
	0	0	0	0	0	0	0	0	0	0	0	0	3.37101	146.976	0	0

## Sheet: CAT 2
	1 CAT 0	30	60	90	120	0-30	30-60	60-90	90-120	Average	chnge in Abs/30sec	chnge in Abs/min	mg pro/ml		Units/mg pro
1	0.786	0.781	0.751	0.764	0.767	0.005	0.03	-0.013	-0.003	0.00475	0.00475	0.0095	4.40784	192.182	0.00494324	0.494324	control v1
2	1.891	1.89	1.884	1.882	1.879	0.001	0.006	0.002	0.003	0.003	0.003	0.006	4.45733	194.339	0.00308738	0.308738
3	0.987	0.981	0.977	0.978	0.979	0.006	0.004	-0.001	-0.001	0.002	0.002	0.004	4.32865	188.729	0.00211944	0.211944
4	0.759	0.756	0.728	0.722	0.72	0.003	0.028	0.006	0.002	0.00975	0.00975	0.0195	4.39794	191.75	0.0101695	1.01695	0.1mM JA
5	0.861	0.842	0.834	0.832	0.828	0.019	0.008	0.002	0.004	0.00825	0.00825	0.0165	4.20987	183.551	0.00898935	0.898935
6	0.891	0.873	0.869	0.859	0.855	0.018	0.004	0.01	0.004	0.009	0.009	0.018	4.29896	187.435	0.00960335	0.960335
7	0.755	0.723	0.719	0.711	0.709	0.032	0.004	0.008	0.002	0.0115	0.0115	0.023	4.45733	194.339	0.011835	1.1835	1mM JA
8	0.886	0.884	0.884	0.881	0.878	0.002	0	0.003	0.003	0.002	0.002	0.004	4.32205	188.442	0.00212267	0.212267
9	0.986	0.984	0.984	0.981	0.976	0.002	0	0.003	0.005	0.0025	0.0025	0.005	4.43753	193.476	0.0025843	0.25843
10	1.154	1.151	1.147	1.126	1.105	0.003	0.004	0.021	0.021	0.01225	0.01225	0.0245	4.21977	183.982	0.0133165	1.33165	Aphid
11	0.542	0.524	0.508	0.491	0.488	0.018	0.016	0.017	0.003	0.0135	0.0135	0.027	4.47712	195.203	0.0138318	1.38318
12	0.578	0.553	0.511	0.491	0.478	0.025	0.042	0.02	0.013	0.025	0.025	0.05	4.37814	190.887	0.0261935	2.61935
13	0.961	0.924	0.902	0.88	0.872	0.037	0.022	0.022	0.008	0.02225	0.02225	0.0445	4.56621	199.087	0.0223521	2.23521	0.1mM+aphid
14	0.667	0.564	0.562	0.559	0.558	0.103	0.002	0.003	0.001	0.02725	0.02725	0.0545	4.45733	194.339	0.0280437	2.80437
15	0.588	0.587	0.584	0.582	0.58	0.001	0.003	0.002	0.002	0.002	0.002	0.004	4.48702	195.634	0.00204463	0.204463
16	0.348	0.287	0.251	0.232	0.227	0.061	0.036	0.019	0.005	0.03025	0.03025	0.0605	4.50352	196.353	0.0308118	3.08118	1mMJA+aphid
17	0.886	0.884	0.884	0.781	0.778	0.002	0	0.103	0.003	0.027	0.027	0.054	4.33855	189.161	0.0285471	2.85471
18	0.875	0.869	0.865	0.854	0.85	0.006	0.004	0.011	0.004	0.00625	0.00625	0.0125	4.19998	183.119	0.00682616	0.682616
19	0.914	0.911	0.912	0.898	0.885	0.003	-0.001	0.014	0.013	0.00725	0.00725	0.0145	5.15019	224.548	0.0064574	0.64574	control v2
20	0.862	0.856	0.854	0.834	0.832	0.006	0.002	0.02	0.002	0.0075	0.0075	0.015	4.56291	198.943	0.00753986	0.753986
21	1.048	1.046	1.032	1.024	1.018	0.002	0.014	0.008	0.006	0.0075	0.0075	0.015	5.52632	240.948	0.00622542	0.622542
22	0.875	0.869	0.865	0.854	0.85	0.006	0.004	0.011	0.004	0.00625	0.00625	0.0125	4.21977	183.982	0.00679414	0.679414	0.1mM JA
23	0.765	0.734	0.732	0.728	0.717	0.031	0.002	0.004	0.011	0.012	0.012	0.024	5.1403	224.117	0.0107087	1.07087
24	0.883	0.879	0.875	0.865	0.861	0.004	0.004	0.01	0.004	0.0055	0.0055	0.011	4.96213	216.349	0.00508438	0.508438
25	1.716	1.712	1.661	1.658	1.657	0.004	0.051	0.003	0.001	0.01475	0.01475	0.0295	4.51672	196.929	0.01498	1.498	1mM JA
26	1.891	1.89	1.874	1.871	1.869	0.001	0.016	0.003	0.002	0.0055	0.0055	0.011	4.12079	179.667	0.00612245	0.612245
27	0.887	0.881	0.877	0.878	0.879	0.006	0.004	-0.001	-0.001	0.002	0.002	0.004	4.04161	176.214	0.00226997	0.226997
28	0.974	0.908	0.843	0.796	0.778	0.066	0.065	0.047	0.018	0.049	0.049	0.098	4.22637	184.27	0.0531829	5.31829	Aphid
29	0.938	0.936	0.953	0.943	0.862	0.002	-0.017	0.01	0.081	0.019	0.019	0.038	4.16038	181.393	0.020949	2.0949
30	1.562	1.467	1.463	1.458	1.423	0.095	0.004	0.005	0.035	0.03475	0.03475	0.0695	4.00201	174.488	0.0398309	3.98309
31	0.974	0.908	0.843	0.796	0.778	0.066	0.065	0.047	0.018	0.049	0.049	0.098	4.14059	180.53	0.0542847	5.42847	0.1mM+aphid
32	0.843	0.801	0.797	0.796	0.771	0.042	0.004	0.001	0.025	0.018	0.018	0.036	4.101	178.803	0.0201338	2.01338
33	0.745	0.732	0.725	0.718	0.711	0.013	0.007	0.007	0.007	0.0085	0.0085	0.017	4.0515	176.646	0.00962379	0.962379
34	0.289	0.287	0.268	0.251	0.237	0.002	0.019	0.017	0.014	0.013	0.013	0.026	4.0911	178.372	0.0145763	1.45763	1mMJA+aphid
35	0.899	0.885	0.868	0.845	0.838	0.014	0.017	0.023	0.007	0.01525	0.01525	0.0305	4.04161	176.214	0.0173085	1.73085
36	0.934	0.933	0.943	0.926	0.927	0.001	-0.01	0.017	-0.001	0.00175	0.00175	0.0035	4.0614	177.077	0.00197654	0.197654
37	0	0	0	0	0	0	0	0	0	0	0	0	4.01191	174.919	0	0
38	0	0	0	0	0	0	0	0	0	0	0	0	4.00201	174.488	0	0
39	0	0	0	0	0	0	0	0	0	0	0	0	4.35835	190.024	0	0
40	0	0	0	0	0	0	0	0	0	0	0	0	4.12409	179.81	0	0
41	0	0	0	0	0	0	0	0	0	0	0	0	4.04161	176.214	0	0
42	0	0	0	0	0	0	0	0	0	0	0	0	4.27916	186.571	0	0
43	0	0	0	0	0	0	0	0	0	0	0	0	4.12079	179.667	0	0
44	0	0	0	0	0	0	0	0	0	0	0	0	4.14719	180.817	0	0
45	0	0	0	0	0	0	0	0	0	0	0	0	4.23957	184.845	0	0
46	0	0	0	0	0	0	0	0	0	0	0	0	4.25937	185.708	0	0
47	0	0	0	0	0	0	0	0	0	0	0	0	4.19008	182.687	0	0
48	0	0	0	0	0	0	0	0	0	0	0	0	4.22967	184.414	0	0
	0	0	0	0	0	0	0	0	0	0	0	0	4.20987	183.551	0	0
	0	0	0	0	0	0	0	0	0	0	0	0	4.23957	184.845	0	0
	0	0	0	0	0	0	0	0	0	0	0	0	4.31875	188.298	0	0
	0	0	0	0	0	0	0	0	0	0	0	0	4.25607	185.564	0	0
	0	0	0	0	0	0	0	0	0	0	0	0	3.98222	173.625	0	0
	0	0	0	0	0	0	0	0	0	0	0	0	4.35835	190.024	0	0
	0	0	0	0	0	0	0	0	0	0	0	0	4.02181	175.351	0	0
	0	0	0	0	0	0	0	0	0	0	0	0	4.12079	179.667	0	0
	0	0	0	0	0	0	0	0	0	0	0	0	3.99212	174.056	0	0
	0	0	0	0	0	0	0	0	0	0	0	0	3.96242	172.762	0	0
	0	0	0	0	0	0	0	0	0	0	0	0	3.67538	160.246	0	0
	0	0	0	0	0	0	0	0	0	0	0	0	3.87664	169.021	0	0
	0	0	0	0	0	0	0	0	0	0	0	0	4.12079	179.667	0	0
	0	0	0	0	0	0	0	0	0	0	0	0	3.99212	174.056	0	0
	0	0	0	0	0	0	0	0	0	0	0	0	4.03171	175.783	0	0
	0	0	0	0	0	0	0	0	0	0	0	0	4.04821	176.502	0	0
	0	0	0	0	0	0	0	0	0	0	0	0	4.00201	174.488	0	0
	0	0	0	0	0	0	0	0	0	0	0	0	4.0614	177.077	0	0
	0	0	0	0	0	0	0	0	0	0	0	0	4.47712	195.203	0	0
	0	0	0	0	0	0	0	0	0	0	0	0	4.18018	182.256	0	0
	0	0	0	0	0	0	0	0	0	0	0	0	3.99212	174.056	0	0
	0	0	0	0	0	0	0	0	0	0	0	0	3.68528	160.678	0	0
	0	0	0	0	0	0	0	0	0	0	0	0	3.36854	146.868	0	0
	0	0	0	0	0	0	0	0	0	0	0	0	3.68198	160.534	0	0
	0	0	0	0	0	0	0	0	0	0	0	0	3.39823	148.163	0	0
	0	0	0	0	0	0	0	0	0	0	0	0	3.10129	135.216	0	0
	0	0	0	0	0	0	0	0	0	0	0	0	4.101	178.803	0	0
	0	0	0	0	0	0	0	0	0	0	0	0	3.5335	154.061	0	0
	0	0	0	0	0	0	0	0	0	0	0	0	4.17028	181.824	0	0
	0	0	0	0	0	0	0	0	0	0	0	0	3.66548	159.815	0	0
	0	0	0	0	0	0	0	0	0	0	0	0	3.27945	142.984	0	0
	0	0	0	0	0	0	0	0	0	0	0	0	3.70507	161.541	0	0
	0	0	0	0	0	0	0	0	0	0	0	0	3.25966	142.121	0	0
	0	0	0	0	0	0	0	0	0	0	0	0	3.28935	143.416	0	0
	0	0	0	0	0	0	0	0	0	0	0	0	2.87363	125.29	0	0
	0	0	0	0	0	0	0	0	0	0	0	0	3.14088	136.942	0	0
	0	0	0	0	0	0	0	0	0	0	0	0	3.32894	145.142	0	0
	0	0	0	0	0	0	0	0	0	0	0	0	3.24976	141.689	0	0
	0	0	0	0	0	0	0	0	0	0	0	0	3.26956	142.553	0	0
	0	0	0	0	0	0	0	0	0	0	0	0	3.28275	143.128	0	0
	0	0	0	0	0	0	0	0	0	0	0	0	3.31905	144.71	0	0
	0	0	0	0	0	0	0	0	0	0	0	0	2.86373	124.859	0	0
	0	0	0	0	0	0	0	0	0	0	0	0	3.25966	142.121	0	0
	0	0	0	0	0	0	0	0	0	0	0	0	3.14748	137.23	0	0
	0	0	0	0	0	0	0	0	0	0	0	0	3.22006	140.395	0	0
	0	0	0	0	0	0	0	0	0	0	0	0	3.32894	145.142	0	0
	0	0	0	0	0	0	0	0	0	0	0	0	3.20027	139.532	0	0
	0	0	0	0	0	0	0	0	0	0	0	0	3.24976	141.689	0	0
	0	0	0	0	0	0	0	0	0	0	0	0	3.15078	137.374	0	0
	0	0	0	0	0	0	0	0	0	0	0	0	2.88353	125.722	0	0
	0	0	0	0	0	0	0	0	0	0	0	0	3.20027	139.532	0	0
	0	0	0	0	0	0	0	0	0	0	0	0	3.07819	134.209	0	0
	0	0	0	0	0	0	0	0	0	0	0	0	3.17057	138.237	0	0
	0	0	0	0	0	0	0	0	0	0	0	0	3.06169	133.49	0	0
	0	0	0	0	0	0	0	0	0	0	0	0	3.14088	136.942	0	0
	0	0	0	0	0	0	0	0	0	0	0	0	3.12438	136.223	0	0
	0	0	0	0	0	0	0	0	0	0	0	0	3.24976	141.689	0	0
	0	0	0	0	0	0	0	0	0	0	0	0	3.26956	142.553	0	0
	0	0	0	0	0	0	0	0	0	0	0	0	3.22006	140.395	0	0
	0	0	0	0	0	0	0	0	0	0	0	0	3.24646	141.546	0	0
	0	0	0	0	0	0	0	0	0	0	0	0	3.17057	138.237	0	0
	0	0	0	0	0	0	0	0	0	0	0	0	3.24976	141.689	0	0
	0	0	0	0	0	0	0	0	0	0	0	0	2.98251	130.037	0	0
	0	0	0	0	0	0	0	0	0	0	0	0	3.13428	136.655	0	0
	0	0	0	0	0	0	0	0	0	0	0	0	2.74496	119.68	0	0
	0	0	0	0	0	0	0	0	0	0	0	0	3.16068	137.805	0	0
	0	0	0	0	0	0	0	0	0	0	0	0	2.78455	121.406	0	0
	0	0	0	0	0	0	0	0	0	0	0	0	2.89673	126.297	0	0
	0	0	0	0	0	0	0	0	0	0	0	0	3.15078	137.374	0	0
	0	0	0	0	0	0	0	0	0	0	0	0	2.95282	128.743	0	0
	0	0	0	0	0	0	0	0	0	0	0	0	2.98251	130.037	0	0
	0	0	0	0	0	0	0	0	0	0	0	0	3.0287	132.051	0	0
	0	0	0	0	0	0	0	0	0	0	0	0	3.19037	139.1	0	0
	0	0	0	0	0	0	0	0	0	0	0	0	3.032	132.195	0	0
	0	0	0	0	0	0	0	0	0	0	0	0	3.20027	139.532	0	0
	0	0	0	0	0	0	0	0	0	0	0	0	3.14088	136.942	0	0
	0	0	0	0	0	0	0	0	0	0	0	0	3.0221	131.764	0	0
	0	0	0	0	0	0	0	0	0	0	0	0	2.89343	126.153	0	0
	0	0	0	0	0	0	0	0	0	0	0	0	3.0419	132.627	0	0
	0	0	0	0	0	0	0	0	0	0	0	0	2.98581	130.181	0	0
	0	0	0	0	0	0	0	0	0	0	0	0	4.34845	189.592	0	0
	0	0	0	0	0	0	0	0	0	0	0	0	4.43753	193.476	0	0
	0	0	0	0	0	0	0	0	0	0	0	0	4.39299	191.534	0	0
	0	0	0	0	0	0	0	0	0	0	0	0	4.41526	192.505	0	0
	0	0	0	0	0	0	0	0	0	0	0	0	4.40784	192.182	0	0
	0	0	0	0	0	0	0	0	0	0	0	0	3.73477	162.836	0	0
	0	0	0	0	0	0	0	0	0	0	0	0	4.0713	177.509	0	0
	0	0	0	0	0	0	0	0	0	0	0	0	3.90303	170.172	0	0
	0	0	0	0	0	0	0	0	0	0	0	0	4.32865	188.729	0	0
	0	0	0	0	0	0	0	0	0	0	0	0	4.35835	190.024	0	0
	0	0	0	0	0	0	0	0	0	0	0	0	4.3435	189.377	0	0
	0	0	0	0	0	0	0	0	0	0	0	0	4.35092	189.7	0	0
	0	0	0	0	0	0	0	0	0	0	0	0	4.38804	191.319	0	0
	0	0	0	0	0	0	0	0	0	0	0	0	4.16038	181.393	0	0
	0	0	0	0	0	0	0	0	0	0	0	0	4.27421	186.356	0	0
	0	0	0	0	0	0	0	0	0	0	0	0	4.2173	183.874	0	0
	0	0	0	0	0	0	0	0	0	0	0	0	3.66548	159.815	0	0
	0	0	0	0	0	0	0	0	0	0	0	0	4.11089	179.235	0	0
	0	0	0	0	0	0	0	0	0	0	0	0	3.88819	169.525	0	0
	0	0	0	0	0	0	0	0	0	0	0	0	3.99954	174.38	0	0
	0	0	0	0	0	0	0	0	0	0	0	0	4.33855	189.161	0	0
	0	0	0	0	0	0	0	0	0	0	0	0	3.37843	147.3	0	0
	0	0	0	0	0	0	0	0	0	0	0	0	3.85849	168.23	0	0
	0	0	0	0	0	0	0	0	0	0	0	0	3.61846	157.765	0	0
	0	0	0	0	0	0	0	0	0	0	0	0	3.36854	146.868	0	0
	0	0	0	0	0	0	0	0	0	0	0	0	3.93273	171.467	0	0
	0	0	0	0	0	0	0	0	0	0	0	0	3.65063	159.168	0	0
	0	0	0	0	0	0	0	0	0	0	0	0	3.79168	165.317	0	0
	0	0	0	0	0	0	0	0	0	0	0	0	3.77436	164.562	0	0
	0	0	0	0	0	0	0	0	0	0	0	0	3.36854	146.868	0	0
	0	0	0	0	0	0	0	0	0	0	0	0	3.57145	155.715	0	0
	0	0	0	0	0	0	0	0	0	0	0	0	3.46999	151.292	0	0
	0	0	0	0	0	0	0	0	0	0	0	0	3.33884	145.574	0	0
	0	0	0	0	0	0	0	0	0	0	0	0	3.25966	142.121	0	0
	0	0	0	0	0	0	0	0	0	0	0	0	3.29925	143.847	0	0
	0	0	0	0	0	0	0	0	0	0	0	0	3.27945	142.984	0	0
	0	0	0	0	0	0	0	0	0	0	0	0	3.21017	139.963	0	0
	0	0	0	0	0	0	0	0	0	0	0	0	2.74496	119.68	0	0
	0	0	0	0	0	0	0	0	0	0	0	0	2.97756	129.822	0	0
	0	0	0	0	0	0	0	0	0	0	0	0	2.86126	124.751	0	0
	0	0	0	0	0	0	0	0	0	0	0	0	2.75485	120.112	0	0
	0	0	0	0	0	0	0	0	0	0	0	0	3.44772	150.321	0	0
	0	0	0	0	0	0	0	0	0	0	0	0	3.10129	135.216	0	0
	0	0	0	0	0	0	0	0	0	0	0	0	3.2745	142.768	0	0
	0	0	0	0	0	0	0	0	0	0	0	0	3.39823	148.163	0	0
	0	0	0	0	0	0	0	0	0	0	0	0	3.42792	149.458	0	0
	0	0	0	0	0	0	0	0	0	0	0	0	3.41308	148.81	0	0
	0	0	0	0	0	0	0	0	0	0	0	0	3.4205	149.134	0	0
	0	0	0	0	0	0	0	0	0	0	0	0	2.88353	125.722	0	0
	0	0	0	0	0	0	0	0	0	0	0	0	2.75485	120.112	0	0
	0	0	0	0	0	0	0	0	0	0	0	0	2.81919	122.917	0	0
	0	0	0	0	0	0	0	0	0	0	0	0	2.78702	121.514	0	0
	0	0	0	0	0	0	0	0	0	0	0	0	2.77465	120.975	0	0
	0	0	0	0	0	0	0	0	0	0	0	0	2.56679	111.912	0	0
	0	0	0	0	0	0	0	0	0	0	0	0	2.67072	116.443	0	0
	0	0	0	0	0	0	0	0	0	0	0	0	2.61876	114.178	0	0
	0	0	0	0	0	0	0	0	0	0	0	0	2.70536	117.954	0	0
	0	0	0	0	0	0	0	0	0	0	0	0	3.34874	146.005	0	0
	0	0	0	0	0	0	0	0	0	0	0	0	3.02705	131.979	0	0
	0	0	0	0	0	0	0	0	0	0	0	0	3.1879	138.992	0	0
	0	0	0	0	0	0	0	0	0	0	0	0	3.43782	149.889	0	0
	0	0	0	0	0	0	0	0	0	0	0	0	2.73506	119.249	0	0
	0	0	0	0	0	0	0	0	0	0	0	0	3.08644	134.569	0	0
	0	0	0	0	0	0	0	0	0	0	0	0	2.91075	126.909	0	0
	0	0	0	0	0	0	0	0	0	0	0	0	3.58629	156.362	0	0
	0	0	0	0	0	0	0	0	0	0	0	0	3.63578	158.52	0	0
	0	0	0	0	0	0	0	0	0	0	0	0	3.61104	157.441	0	0
	0	0	0	0	0	0	0	0	0	0	0	0	3.62341	157.981	0	0
	0	0	0	0	0	0	0	0	0	0	0	0	4.50682	196.497	0	0
	0	0	0	0	0	0	0	0	0	0	0	0	4.53651	197.792	0	0
	0	0	0	0	0	0	0	0	0	0	0	0	4.52166	197.145	0	0
	0	0	0	0	0	0	0	0	0	0	0	0	4.52909	197.468	0	0
	0	0	0	0	0	0	0	0	0	0	0	0	4.22967	184.414	0	0
	0	0	0	0	0	0	0	0	0	0	0	0	3.66548	159.815	0	0
	0	0	0	0	0	0	0	0	0	0	0	0	3.94757	172.114	0	0
	0	0	0	0	0	0	0	0	0	0	0	0	3.80653	165.965	0	0
	0	0	0	0	0	0	0	0	0	0	0	0	4.26926	186.14	0	0
	0	0	0	0	0	0	0	0	0	0	0	0	4.93244	215.054	0	0
	0	0	0	0	0	0	0	0	0	0	0	0	4.60085	200.597	0	0
	0	0	0	0	0	0	0	0	0	0	0	0	4.76664	207.826	0	0
	0	0	0	0	0	0	0	0	0	0	0	0	3.46752	151.184	0	0
	0	0	0	0	0	0	0	0	0	0	0	0	3.49721	152.478	0	0
	0	0	0	0	0	0	0	0	0	0	0	0	3.48236	151.831	0	0
	0	0	0	0	0	0	0	0	0	0	0	0	3.48979	152.155	0	0
	0	0	0	0	0	0	0	0	0	0	0	0	4.01191	174.919	0	0
	0	0	0	0	0	0	0	0	0	0	0	0	3.5368	154.205	0	0
	0	0	0	0	0	0	0	0	0	0	0	0	3.77436	164.562	0	0
	0	0	0	0	0	0	0	0	0	0	0	0	3.65558	159.383	0	0
	0	0	0	0	0	0	0	0	0	0	0	0	4.11089	179.235	0	0
	0	0	0	0	0	0	0	0	0	0	0	0	3.44772	150.321	0	0
	0	0	0	0	0	0	0	0	0	0	0	0	3.77931	164.778	0	0
	0	0	0	0	0	0	0	0	0	0	0	0	3.61351	157.549	0	0
	0	0	0	0	0	0	0	0	0	0	0	0	3.46752	151.184	0	0
	0	0	0	0	0	0	0	0	0	0	0	0	3.5467	154.636	0	0
	0	0	0	0	0	0	0	0	0	0	0	0	3.50711	152.91	0	0
	0	0	0	0	0	0	0	0	0	0	0	0	3.52691	153.773	0	0
	0	0	0	0	0	0	0	0	0	0	0	0	3.5665	155.499	0	0
	0	0	0	0	0	0	0	0	0	0	0	0	3.44772	150.321	0	0
	0	0	0	0	0	0	0	0	0	0	0	0	3.50711	152.91	0	0
	0	0	0	0	0	0	0	0	0	0	0	0	3.47742	151.615	0	0
	0	0	0	0	0	0	0	0	0	0	0	0	3.52691	153.773	0	0
	0	0	0	0	0	0	0	0	0	0	0	0	3.15078	137.374	0	0
	0	0	0	0	0	0	0	0	0	0	0	0	3.33884	145.574	0	0
	0	0	0	0	0	0	0	0	0	0	0	0	3.24481	141.474	0	0
	0	0	0	0	0	0	0	0	0	0	0	0	3.47742	151.615	0	0
	0	0	0	0	0	0	0	0	0	0	0	0	3.26956	142.553	0	0
	0	0	0	0	0	0	0	0	0	0	0	0	3.37349	147.084	0	0
	0	0	0	0	0	0	0	0	0	0	0	0	3.32152	144.818	0	0
	0	0	0	0	0	0	0	0	0	0	0	0	3.36854	146.868	0	0
	0	0	0	0	0	0	0	0	0	0	0	0	3.44772	150.321	0	0
	0	0	0	0	0	0	0	0	0	0	0	0	3.40813	148.594	0	0
	0	0	0	0	0	0	0	0	0	0	0	0	3.42792	149.458	0	0
	0	0	0	0	0	0	0	0	0	0	0	0	2.63608	114.933	0	0
	0	0	0	0	0	0	0	0	0	0	0	0	2.67567	116.659	0	0
	0	0	0	0	0	0	0	0	0	0	0	0	2.65587	115.796	0	0
	0	0	0	0	0	0	0	0	0	0	0	0	2.66577	116.228	0	0
	0	0	0	0	0	0	0	0	0	0	0	0	3.47742	151.615	0	0
	0	0	0	0	0	0	0	0	0	0	0	0	2.69547	117.522	0	0
	0	0	0	0	0	0	0	0	0	0	0	0	3.08644	134.569	0	0
	0	0	0	0	0	0	0	0	0	0	0	0	2.89095	126.046	0	0
	0	0	0	0	0	0	0	0	0	0	0	0	2.85383	124.427	0	0
	0	0	0	0	0	0	0	0	0	0	0	0	2.75485	120.112	0	0
	0	0	0	0	0	0	0	0	0	0	0	0	2.80434	122.269	0	0
	0	0	0	0	0	0	0	0	0	0	0	0	2.7796	121.191	0	0
	0	0	0	0	0	0	0	0	0	0	0	0	2.57669	112.344	0	0
	0	0	0	0	0	0	0	0	0	0	0	0	3.63578	158.52	0	0
	0	0	0	0	0	0	0	0	0	0	0	0	3.10624	135.432	0	0
	0	0	0	0	0	0	0	0	0	0	0	0	3.37101	146.976	0	0

## Sheet: CAT 3
	1 CAT 0	30	60	90	120	0-30	30-60	60-90	90-120	Average	chnge in Abs/30sec	chnge in Abs/min	mg pro/ml		Units/mg pro
1	1.359	1.358	1.316	1.376	1.352	0.001	0.042	-0.06	0.024	0.00175	0.00175	0.0035	4.40784	192.182	0.00182119	0.182119	control v1
2	1.204	1.164	1.149	1.238	1.193	0.04	0.015	-0.089	0.045	0.00275	0.00275	0.0055	4.45733	194.339	0.0028301	0.28301
3	1.126	1.018	1.012	1.011	1.009	0.108	0.006	0.001	0.002	0.02925	0.02925	0.0585	4.32865	188.729	0.0309968	3.09968
4	0.869	0.826	0.796	0.787	0.774	0.043	0.03	0.009	0.013	0.02375	0.02375	0.0475	4.39794	191.75	0.0247718	2.47718	0.1mM JA
5	0.667	0.664	0.662	0.659	0.658	0.003	0.002	0.003	0.001	0.00225	0.00225	0.0045	4.20987	183.551	0.00245164	0.245164
6	0.588	0.587	0.584	0.582	0.58	0.001	0.003	0.002	0.002	0.002	0.002	0.004	4.29896	187.435	0.00213408	0.213408
7	1.891	1.89	1.884	1.882	1.879	0.001	0.006	0.002	0.003	0.003	0.003	0.006	4.45733	194.339	0.00308738	0.308738	1mM JA
8	0.987	0.981	0.977	0.978	0.979	0.006	0.004	-0.001	-0.001	0.002	0.002	0.004	4.32205	188.442	0.00212267	0.212267
9	0.654	0.651	0.643	0.641	0.637	0.003	0.008	0.002	0.004	0.00425	0.00425	0.0085	4.43753	193.476	0.0043933	0.43933
10	0.869	0.826	0.796	0.723	0.689	0.043	0.03	0.073	0.034	0.045	0.045	0.09	4.21977	183.982	0.0489178	4.89178	Aphid
11	0.831	0.812	0.791	0.773	0.743	0.019	0.021	0.018	0.03	0.022	0.022	0.044	4.47712	195.203	0.0225407	2.25407
12	0.845	0.831	0.854	0.834	0.802	0.014	-0.023	0.02	0.032	0.01075	0.01075	0.0215	4.37814	190.887	0.0112632	1.12632
13	1.649	1.513	1.665	1.643	1.577	0.136	-0.152	0.022	0.066	0.018	0.018	0.036	4.56621	199.087	0.0180826	1.80826	0.1mM+aphid
14	1.431	1.432	1.438	1.423	1.407	-0.001	-0.006	0.015	0.016	0.006	0.006	0.012	4.45733	194.339	0.00617476	0.617476
15	1.689	1.651	1.634	1.622	1.608	0.038	0.017	0.012	0.014	0.02025	0.02025	0.0405	4.48702	195.634	0.0207019	2.07019
16	1.473	1.428	1.399	1.352	1.312	0.045	0.029	0.047	0.04	0.04025	0.04025	0.0805	4.50352	196.353	0.0409975	4.09975	1mMJA+aphid
17	1.264	1.256	1.232	1.212	1.201	0.008	0.024	0.02	0.011	0.01575	0.01575	0.0315	4.33855	189.161	0.0166525	1.66525
18	1.523	1.528	1.492	1.481	1.456	-0.005	0.036	0.011	0.025	0.01675	0.01675	0.0335	4.19998	183.119	0.0182941	1.82941
19	0.987	0.985	0.981	0.977	0.975	0.002	0.004	0.004	0.002	0.003	0.003	0.006	5.15019	224.548	0.00267203	0.267203	control v2
20	0.856	0.855	0.844	0.841	0.838	0.001	0.011	0.003	0.003	0.0045	0.0045	0.009	4.56291	198.943	0.00452391	0.452391
21	0.867	0.861	0.856	0.849	0.841	0.006	0.005	0.007	0.008	0.0065	0.0065	0.013	5.52632	240.948	0.00539536	0.539536
22	0.843	0.801	0.877	0.896	0.831	0.042	-0.076	-0.019	0.065	0.003	0.003	0.006	4.21977	183.982	0.00326119	0.326119	0.1mM JA
23	0.588	0.587	0.584	0.582	0.58	0.001	0.003	0.002	0.002	0.002	0.002	0.004	5.1403	224.117	0.00178478	0.178478
24	0.967	0.943	0.934	0.931	0.929	0.024	0.009	0.003	0.002	0.0095	0.0095	0.019	4.96213	216.349	0.00878211	0.878211
25	0.863	0.835	0.822	0.856	0.812	0.028	0.013	-0.034	0.044	0.01275	0.01275	0.0255	4.51672	196.929	0.0129488	1.29488	1mM JA
26	0.673	0.666	0.654	0.651	0.644	0.007	0.012	0.003	0.007	0.00725	0.00725	0.0145	4.12079	179.667	0.00807051	0.807051
27	1.891	1.89	1.884	1.882	1.875	0.001	0.006	0.002	0.007	0.004	0.004	0.008	4.04161	176.214	0.00453993	0.453993
28	0.585	0.488	0.479	0.446	0.402	0.097	0.009	0.033	0.044	0.04575	0.04575	0.0915	4.22637	184.27	0.0496555	4.96555	Aphid
29	0.578	0.544	0.534	0.509	0.466	0.034	0.01	0.025	0.043	0.028	0.028	0.056	4.16038	181.393	0.0308722	3.08722
30	0.743	0.734	0.712	0.691	0.654	0.009	0.022	0.021	0.037	0.02225	0.02225	0.0445	4.00201	174.488	0.0255032	2.55032
31	0.585	0.588	0.589	0.534	0.511	-0.003	-0.001	0.055	0.023	0.0185	0.0185	0.037	4.14059	180.53	0.0204953	2.04953	0.1mM+aphid
32	0.789	0.787	0.789	0.714	0.698	0.002	-0.002	0.075	0.016	0.02275	0.02275	0.0455	4.101	178.803	0.0254469	2.54469
33	0.862	0.885	0.868	0.855	0.858	-0.023	0.017	0.013	-0.003	0.001	0.001	0.002	4.0515	176.646	0.00113221	0.113221
34	0.934	0.933	0.943	0.926	0.907	0.001	-0.01	0.017	0.019	0.00675	0.00675	0.0135	4.0911	178.372	0.00756846	0.756846	1mMJA+aphid
35	0.964	0.953	0.933	0.915	0.901	0.011	0.02	0.018	0.014	0.01575	0.01575	0.0315	4.04161	176.214	0.017876	1.7876
36	0.764	0.734	0.721	0.709	0.692	0.03	0.013	0.012	0.017	0.018	0.018	0.036	4.0614	177.077	0.0203301	2.03301
37	0	0	0	0	0	0	0	0	0	0	0	0	4.01191	174.919	0	0
38	0	0	0	0	0	0	0	0	0	0	0	0	4.00201	174.488	0	0
39	0	0	0	0	0	0	0	0	0	0	0	0	4.35835	190.024	0	0
40	0	0	0	0	0	0	0	0	0	0	0	0	4.12409	179.81	0	0
41	0	0	0	0	0	0	0	0	0	0	0	0	4.04161	176.214	0	0
42	0	0	0	0	0	0	0	0	0	0	0	0	4.27916	186.571	0	0
43	0	0	0	0	0	0	0	0	0	0	0	0	4.12079	179.667	0	0
44	0	0	0	0	0	0	0	0	0	0	0	0	4.14719	180.817	0	0
45	0	0	0	0	0	0	0	0	0	0	0	0	4.23957	184.845	0	0
46	0	0	0	0	0	0	0	0	0	0	0	0	4.25937	185.708	0	0
47	0	0	0	0	0	0	0	0	0	0	0	0	4.19008	182.687	0	0
48	0	0	0	0	0	0	0	0	0	0	0	0	4.22967	184.414	0	0
	0	0	0	0	0	0	0	0	0	0	0	0	4.20987	183.551	0	0
	0	0	0	0	0	0	0	0	0	0	0	0	4.23957	184.845	0	0
	0	0	0	0	0	0	0	0	0	0	0	0	4.31875	188.298	0	0
	0	0	0	0	0	0	0	0	0	0	0	0	4.25607	185.564	0	0
	0	0	0	0	0	0	0	0	0	0	0	0	3.98222	173.625	0	0
	0	0	0	0	0	0	0	0	0	0	0	0	4.35835	190.024	0	0
	0	0	0	0	0	0	0	0	0	0	0	0	4.02181	175.351	0	0
	0	0	0	0	0	0	0	0	0	0	0	0	4.12079	179.667	0	0
	0	0	0	0	0	0	0	0	0	0	0	0	3.99212	174.056	0	0
	0	0	0	0	0	0	0	0	0	0	0	0	3.96242	172.762	0	0
	0	0	0	0	0	0	0	0	0	0	0	0	3.67538	160.246	0	0
	0	0	0	0	0	0	0	0	0	0	0	0	3.87664	169.021	0	0
	0	0	0	0	0	0	0	0	0	0	0	0	4.12079	179.667	0	0
	0	0	0	0	0	0	0	0	0	0	0	0	3.99212	174.056	0	0
	0	0	0	0	0	0	0	0	0	0	0	0	4.03171	175.783	0	0
	0	0	0	0	0	0	0	0	0	0	0	0	4.04821	176.502	0	0
	0	0	0	0	0	0	0	0	0	0	0	0	4.00201	174.488	0	0
	0	0	0	0	0	0	0	0	0	0	0	0	4.0614	177.077	0	0
	0	0	0	0	0	0	0	0	0	0	0	0	4.47712	195.203	0	0
	0	0	0	0	0	0	0	0	0	0	0	0	4.18018	182.256	0	0
	0	0	0	0	0	0	0	0	0	0	0	0	3.99212	174.056	0	0
	0	0	0	0	0	0	0	0	0	0	0	0	3.68528	160.678	0	0
	0	0	0	0	0	0	0	0	0	0	0	0	3.36854	146.868	0	0
	0	0	0	0	0	0	0	0	0	0	0	0	3.68198	160.534	0	0
	0	0	0	0	0	0	0	0	0	0	0	0	3.39823	148.163	0	0
	0	0	0	0	0	0	0	0	0	0	0	0	3.10129	135.216	0	0
	0	0	0	0	0	0	0	0	0	0	0	0	4.101	178.803	0	0
	0	0	0	0	0	0	0	0	0	0	0	0	3.5335	154.061	0	0
	0	0	0	0	0	0	0	0	0	0	0	0	4.17028	181.824	0	0
	0	0	0	0	0	0	0	0	0	0	0	0	3.66548	159.815	0	0
	0	0	0	0	0	0	0	0	0	0	0	0	3.27945	142.984	0	0
	0	0	0	0	0	0	0	0	0	0	0	0	3.70507	161.541	0	0
	0	0	0	0	0	0	0	0	0	0	0	0	3.25966	142.121	0	0
	0	0	0	0	0	0	0	0	0	0	0	0	3.28935	143.416	0	0
	0	0	0	0	0	0	0	0	0	0	0	0	2.87363	125.29	0	0
	0	0	0	0	0	0	0	0	0	0	0	0	3.14088	136.942	0	0
	0	0	0	0	0	0	0	0	0	0	0	0	3.32894	145.142	0	0
	0	0	0	0	0	0	0	0	0	0	0	0	3.24976	141.689	0	0
	0	0	0	0	0	0	0	0	0	0	0	0	3.26956	142.553	0	0
	0	0	0	0	0	0	0	0	0	0	0	0	3.28275	143.128	0	0
	0	0	0	0	0	0	0	0	0	0	0	0	3.31905	144.71	0	0
	0	0	0	0	0	0	0	0	0	0	0	0	2.86373	124.859	0	0
	0	0	0	0	0	0	0	0	0	0	0	0	3.25966	142.121	0	0
	0	0	0	0	0	0	0	0	0	0	0	0	3.14748	137.23	0	0
	0	0	0	0	0	0	0	0	0	0	0	0	3.22006	140.395	0	0
	0	0	0	0	0	0	0	0	0	0	0	0	3.32894	145.142	0	0
	0	0	0	0	0	0	0	0	0	0	0	0	3.20027	139.532	0	0
	0	0	0	0	0	0	0	0	0	0	0	0	3.24976	141.689	0	0
	0	0	0	0	0	0	0	0	0	0	0	0	3.15078	137.374	0	0
	0	0	0	0	0	0	0	0	0	0	0	0	2.88353	125.722	0	0
	0	0	0	0	0	0	0	0	0	0	0	0	3.20027	139.532	0	0
	0	0	0	0	0	0	0	0	0	0	0	0	3.07819	134.209	0	0
	0	0	0	0	0	0	0	0	0	0	0	0	3.17057	138.237	0	0
	0	0	0	0	0	0	0	0	0	0	0	0	3.06169	133.49	0	0
	0	0	0	0	0	0	0	0	0	0	0	0	3.14088	136.942	0	0
	0	0	0	0	0	0	0	0	0	0	0	0	3.12438	136.223	0	0
	0	0	0	0	0	0	0	0	0	0	0	0	3.24976	141.689	0	0
	0	0	0	0	0	0	0	0	0	0	0	0	3.26956	142.553	0	0
	0	0	0	0	0	0	0	0	0	0	0	0	3.22006	140.395	0	0
	0	0	0	0	0	0	0	0	0	0	0	0	3.24646	141.546	0	0
	0	0	0	0	0	0	0	0	0	0	0	0	3.17057	138.237	0	0
	0	0	0	0	0	0	0	0	0	0	0	0	3.24976	141.689	0	0
	0	0	0	0	0	0	0	0	0	0	0	0	2.98251	130.037	0	0
	0	0	0	0	0	0	0	0	0	0	0	0	3.13428	136.655	0	0
	0	0	0	0	0	0	0	0	0	0	0	0	2.74496	119.68	0	0
	0	0	0	0	0	0	0	0	0	0	0	0	3.16068	137.805	0	0
	0	0	0	0	0	0	0	0	0	0	0	0	2.78455	121.406	0	0
	0	0	0	0	0	0	0	0	0	0	0	0	2.89673	126.297	0	0
	0	0	0	0	0	0	0	0	0	0	0	0	3.15078	137.374	0	0
	0	0	0	0	0	0	0	0	0	0	0	0	2.95282	128.743	0	0
	0	0	0	0	0	0	0	0	0	0	0	0	2.98251	130.037	0	0
	0	0	0	0	0	0	0	0	0	0	0	0	3.0287	132.051	0	0
	0	0	0	0	0	0	0	0	0	0	0	0	3.19037	139.1	0	0
	0	0	0	0	0	0	0	0	0	0	0	0	3.032	132.195	0	0
	0	0	0	0	0	0	0	0	0	0	0	0	3.20027	139.532	0	0
	0	0	0	0	0	0	0	0	0	0	0	0	3.14088	136.942	0	0
	0	0	0	0	0	0	0	0	0	0	0	0	3.0221	131.764	0	0
	0	0	0	0	0	0	0	0	0	0	0	0	2.89343	126.153	0	0
	0	0	0	0	0	0	0	0	0	0	0	0	3.0419	132.627	0	0
	0	0	0	0	0	0	0	0	0	0	0	0	2.98581	130.181	0	0
	0	0	0	0	0	0	0	0	0	0	0	0	4.34845	189.592	0	0
	0	0	0	0	0	0	0	0	0	0	0	0	4.43753	193.476	0	0
	0	0	0	0	0	0	0	0	0	0	0	0	4.39299	191.534	0	0
	0	0	0	0	0	0	0	0	0	0	0	0	4.41526	192.505	0	0
	0	0	0	0	0	0	0	0	0	0	0	0	4.40784	192.182	0	0
	0	0	0	0	0	0	0	0	0	0	0	0	3.73477	162.836	0	0
	0	0	0	0	0	0	0	0	0	0	0	0	4.0713	177.509	0	0
	0	0	0	0	0	0	0	0	0	0	0	0	3.90303	170.172	0	0
	0	0	0	0	0	0	0	0	0	0	0	0	4.32865	188.729	0	0
	0	0	0	0	0	0	0	0	0	0	0	0	4.35835	190.024	0	0
	0	0	0	0	0	0	0	0	0	0	0	0	4.3435	189.377	0	0
	0	0	0	0	0	0	0	0	0	0	0	0	4.35092	189.7	0	0
	0	0	0	0	0	0	0	0	0	0	0	0	4.38804	191.319	0	0
	0	0	0	0	0	0	0	0	0	0	0	0	4.16038	181.393	0	0
	0	0	0	0	0	0	0	0	0	0	0	0	4.27421	186.356	0	0
	0	0	0	0	0	0	0	0	0	0	0	0	4.2173	183.874	0	0
	0	0	0	0	0	0	0	0	0	0	0	0	3.66548	159.815	0	0
	0	0	0	0	0	0	0	0	0	0	0	0	4.11089	179.235	0	0
	0	0	0	0	0	0	0	0	0	0	0	0	3.88819	169.525	0	0
	0	0	0	0	0	0	0	0	0	0	0	0	3.99954	174.38	0	0
	0	0	0	0	0	0	0	0	0	0	0	0	4.33855	189.161	0	0
	0	0	0	0	0	0	0	0	0	0	0	0	3.37843	147.3	0	0
	0	0	0	0	0	0	0	0	0	0	0	0	3.85849	168.23	0	0
	0	0	0	0	0	0	0	0	0	0	0	0	3.61846	157.765	0	0
	0	0	0	0	0	0	0	0	0	0	0	0	3.36854	146.868	0	0
	0	0	0	0	0	0	0	0	0	0	0	0	3.93273	171.467	0	0
	0	0	0	0	0	0	0	0	0	0	0	0	3.65063	159.168	0	0
	0	0	0	0	0	0	0	0	0	0	0	0	3.79168	165.317	0	0
	0	0	0	0	0	0	0	0	0	0	0	0	3.77436	164.562	0	0
	0	0	0	0	0	0	0	0	0	0	0	0	3.36854	146.868	0	0
	0	0	0	0	0	0	0	0	0	0	0	0	3.57145	155.715	0	0
	0	0	0	0	0	0	0	0	0	0	0	0	3.46999	151.292	0	0
	0	0	0	0	0	0	0	0	0	0	0	0	3.33884	145.574	0	0
	0	0	0	0	0	0	0	0	0	0	0	0	3.25966	142.121	0	0
	0	0	0	0	0	0	0	0	0	0	0	0	3.29925	143.847	0	0
	0	0	0	0	0	0	0	0	0	0	0	0	3.27945	142.984	0	0
	0	0	0	0	0	0	0	0	0	0	0	0	3.21017	139.963	0	0
	0	0	0	0	0	0	0	0	0	0	0	0	2.74496	119.68	0	0
	0	0	0	0	0	0	0	0	0	0	0	0	2.97756	129.822	0	0
	0	0	0	0	0	0	0	0	0	0	0	0	2.86126	124.751	0	0
	0	0	0	0	0	0	0	0	0	0	0	0	2.75485	120.112	0	0
	0	0	0	0	0	0	0	0	0	0	0	0	3.44772	150.321	0	0
	0	0	0	0	0	0	0	0	0	0	0	0	3.10129	135.216	0	0
	0	0	0	0	0	0	0	0	0	0	0	0	3.2745	142.768	0	0
	0	0	0	0	0	0	0	0	0	0	0	0	3.39823	148.163	0	0
	0	0	0	0	0	0	0	0	0	0	0	0	3.42792	149.458	0	0
	0	0	0	0	0	0	0	0	0	0	0	0	3.41308	148.81	0	0
	0	0	0	0	0	0	0	0	0	0	0	0	3.4205	149.134	0	0
	0	0	0	0	0	0	0	0	0	0	0	0	2.88353	125.722	0	0
	0	0	0	0	0	0	0	0	0	0	0	0	2.75485	120.112	0	0
	0	0	0	0	0	0	0	0	0	0	0	0	2.81919	122.917	0	0
	0	0	0	0	0	0	0	0	0	0	0	0	2.78702	121.514	0	0
	0	0	0	0	0	0	0	0	0	0	0	0	2.77465	120.975	0	0
	0	0	0	0	0	0	0	0	0	0	0	0	2.56679	111.912	0	0
	0	0	0	0	0	0	0	0	0	0	0	0	2.67072	116.443	0	0
	0	0	0	0	0	0	0	0	0	0	0	0	2.61876	114.178	0	0
	0	0	0	0	0	0	0	0	0	0	0	0	2.70536	117.954	0	0
	0	0	0	0	0	0	0	0	0	0	0	0	3.34874	146.005	0	0
	0	0	0	0	0	0	0	0	0	0	0	0	3.02705	131.979	0	0
	0	0	0	0	0	0	0	0	0	0	0	0	3.1879	138.992	0	0
	0	0	0	0	0	0	0	0	0	0	0	0	3.43782	149.889	0	0
	0	0	0	0	0	0	0	0	0	0	0	0	2.73506	119.249	0	0
	0	0	0	0	0	0	0	0	0	0	0	0	3.08644	134.569	0	0
	0	0	0	0	0	0	0	0	0	0	0	0	2.91075	126.909	0	0
	0	0	0	0	0	0	0	0	0	0	0	0	3.58629	156.362	0	0
	0	0	0	0	0	0	0	0	0	0	0	0	3.63578	158.52	0	0
	0	0	0	0	0	0	0	0	0	0	0	0	3.61104	157.441	0	0
	0	0	0	0	0	0	0	0	0	0	0	0	3.62341	157.981	0	0
	0	0	0	0	0	0	0	0	0	0	0	0	4.50682	196.497	0	0
	0	0	0	0	0	0	0	0	0	0	0	0	4.53651	197.792	0	0
	0	0	0	0	0	0	0	0	0	0	0	0	4.52166	197.145	0	0
	0	0	0	0	0	0	0	0	0	0	0	0	4.52909	197.468	0	0
	0	0	0	0	0	0	0	0	0	0	0	0	4.22967	184.414	0	0
	0	0	0	0	0	0	0	0	0	0	0	0	3.66548	159.815	0	0
	0	0	0	0	0	0	0	0	0	0	0	0	3.94757	172.114	0	0
	0	0	0	0	0	0	0	0	0	0	0	0	3.80653	165.965	0	0
	0	0	0	0	0	0	0	0	0	0	0	0	4.26926	186.14	0	0
	0	0	0	0	0	0	0	0	0	0	0	0	4.93244	215.054	0	0
	0	0	0	0	0	0	0	0	0	0	0	0	4.60085	200.597	0	0
	0	0	0	0	0	0	0	0	0	0	0	0	4.76664	207.826	0	0
	0	0	0	0	0	0	0	0	0	0	0	0	3.46752	151.184	0	0
	0	0	0	0	0	0	0	0	0	0	0	0	3.49721	152.478	0	0
	0	0	0	0	0	0	0	0	0	0	0	0	3.48236	151.831	0	0
	0	0	0	0	0	0	0	0	0	0	0	0	3.48979	152.155	0	0
	0	0	0	0	0	0	0	0	0	0	0	0	4.01191	174.919	0	0
	0	0	0	0	0	0	0	0	0	0	0	0	3.5368	154.205	0	0
	0	0	0	0	0	0	0	0	0	0	0	0	3.77436	164.562	0	0
	0	0	0	0	0	0	0	0	0	0	0	0	3.65558	159.383	0	0
	0	0	0	0	0	0	0	0	0	0	0	0	4.11089	179.235	0	0
	0	0	0	0	0	0	0	0	0	0	0	0	3.44772	150.321	0	0
	0	0	0	0	0	0	0	0	0	0	0	0	3.77931	164.778	0	0
	0	0	0	0	0	0	0	0	0	0	0	0	3.61351	157.549	0	0
	0	0	0	0	0	0	0	0	0	0	0	0	3.46752	151.184	0	0
	0	0	0	0	0	0	0	0	0	0	0	0	3.5467	154.636	0	0
	0	0	0	0	0	0	0	0	0	0	0	0	3.50711	152.91	0	0
	0	0	0	0	0	0	0	0	0	0	0	0	3.52691	153.773	0	0
	0	0	0	0	0	0	0	0	0	0	0	0	3.5665	155.499	0	0
	0	0	0	0	0	0	0	0	0	0	0	0	3.44772	150.321	0	0
	0	0	0	0	0	0	0	0	0	0	0	0	3.50711	152.91	0	0
	0	0	0	0	0	0	0	0	0	0	0	0	3.47742	151.615	0	0
	0	0	0	0	0	0	0	0	0	0	0	0	3.52691	153.773	0	0
	0	0	0	0	0	0	0	0	0	0	0	0	3.15078	137.374	0	0
	0	0	0	0	0	0	0	0	0	0	0	0	3.33884	145.574	0	0
	0	0	0	0	0	0	0	0	0	0	0	0	3.24481	141.474	0	0
	0	0	0	0	0	0	0	0	0	0	0	0	3.47742	151.615	0	0
	0	0	0	0	0	0	0	0	0	0	0	0	3.26956	142.553	0	0
	0	0	0	0	0	0	0	0	0	0	0	0	3.37349	147.084	0	0
	0	0	0	0	0	0	0	0	0	0	0	0	3.32152	144.818	0	0
	0	0	0	0	0	0	0	0	0	0	0	0	3.36854	146.868	0	0
	0	0	0	0	0	0	0	0	0	0	0	0	3.44772	150.321	0	0
	0	0	0	0	0	0	0	0	0	0	0	0	3.40813	148.594	0	0
	0	0	0	0	0	0	0	0	0	0	0	0	3.42792	149.458	0	0
	0	0	0	0	0	0	0	0	0	0	0	0	2.63608	114.933	0	0
	0	0	0	0	0	0	0	0	0	0	0	0	2.67567	116.659	0	0
	0	0	0	0	0	0	0	0	0	0	0	0	2.65587	115.796	0	0
	0	0	0	0	0	0	0	0	0	0	0	0	2.66577	116.228	0	0
	0	0	0	0	0	0	0	0	0	0	0	0	3.47742	151.615	0	0
	0	0	0	0	0	0	0	0	0	0	0	0	2.69547	117.522	0	0
	0	0	0	0	0	0	0	0	0	0	0	0	3.08644	134.569	0	0
	0	0	0	0	0	0	0	0	0	0	0	0	2.89095	126.046	0	0
	0	0	0	0	0	0	0	0	0	0	0	0	2.85383	124.427	0	0
	0	0	0	0	0	0	0	0	0	0	0	0	2.75485	120.112	0	0
	0	0	0	0	0	0	0	0	0	0	0	0	2.80434	122.269	0	0
	0	0	0	0	0	0	0	0	0	0	0	0	2.7796	121.191	0	0
	0	0	0	0	0	0	0	0	0	0	0	0	2.57669	112.344	0	0
	0	0	0	0	0	0	0	0	0	0	0	0	3.63578	158.52	0	0
	0	0	0	0	0	0	0	0	0	0	0	0	3.10624	135.432	0	0
	0	0	0	0	0	0	0	0	0	0	0	0	3.37101	146.976	0	0

## Sheet: CAT 4
	1 CAT 0	30	60	90	120	0-30	30-60	60-90	90-120	Average	chnge in Abs/30sec	chnge in Abs/min	mg pro/ml		Units/mg pro
1	0.686	0.681	0.651	0.664	0.667	0.005	0.03	-0.013	-0.003	0.00475	0.00475	0.0095	4.40784	192.182	0.00494324	0.494324	control v1
2	1.891	1.89	1.884	1.882	1.879	0.001	0.006	0.002	0.003	0.003	0.003	0.006	4.45733	194.339	0.00308738	0.308738
3	0.887	0.881	0.877	0.878	0.879	0.006	0.004	-0.001	-0.001	0.002	0.002	0.004	4.32865	188.729	0.00211944	0.211944
4	0.559	0.556	0.548	0.539	0.532	0.003	0.008	0.009	0.007	0.00675	0.00675	0.0135	4.39794	191.75	0.00704041	0.704041	0.1mM JA
5	0.761	0.742	0.734	0.732	0.729	0.019	0.008	0.002	0.003	0.008	0.008	0.016	4.20987	183.551	0.00871695	0.871695
6	0.791	0.773	0.769	0.761	0.758	0.018	0.004	0.008	0.003	0.00825	0.00825	0.0165	4.29896	187.435	0.00880307	0.880307
7	0.688	0.681	0.677	0.671	0.668	0.007	0.004	0.006	0.003	0.005	0.005	0.01	4.45733	194.339	0.00514564	0.514564	1mM JA
8	0.886	0.884	0.884	0.881	0.878	0.002	0	0.003	0.003	0.002	0.002	0.004	4.32205	188.442	0.00212267	0.212267
9	0.986	0.984	0.984	0.981	0.976	0.002	0	0.003	0.005	0.0025	0.0025	0.005	4.43753	193.476	0.0025843	0.25843
10	1.169	1.151	1.138	1.126	1.102	0.018	0.013	0.012	0.024	0.01675	0.01675	0.0335	4.21977	183.982	0.0182083	1.82083	Aphid
11	0.599	0.564	0.508	0.491	0.488	0.035	0.056	0.017	0.003	0.02775	0.02775	0.0555	4.47712	195.203	0.028432	2.8432
12	0.578	0.553	0.511	0.491	0.478	0.025	0.042	0.02	0.013	0.025	0.025	0.05	4.37814	190.887	0.0261935	2.61935
13	0.961	0.924	0.902	0.88	0.854	0.037	0.022	0.022	0.026	0.02675	0.02675	0.0535	4.56621	199.087	0.0268727	2.68727	0.1mM+aphid
14	0.667	0.564	0.562	0.545	0.523	0.103	0.002	0.017	0.022	0.036	0.036	0.072	4.45733	194.339	0.0370486	3.70486
15	0.588	0.587	0.584	0.582	0.543	0.001	0.003	0.002	0.039	0.01125	0.01125	0.0225	4.48702	195.634	0.0115011	1.15011
16	0.348	0.287	0.251	0.232	0.212	0.061	0.036	0.019	0.02	0.034	0.034	0.068	4.50352	196.353	0.0346314	3.46314	1mMJA+aphid
17	0.886	0.884	0.884	0.765	0.754	0.002	0	0.119	0.011	0.033	0.033	0.066	4.33855	189.161	0.034891	3.4891
18	0.875	0.869	0.865	0.844	0.834	0.006	0.004	0.021	0.01	0.01025	0.01025	0.0205	4.19998	183.119	0.0111949	1.11949
19	0.914	0.911	0.912	0.898	0.885	0.003	-0.001	0.014	0.013	0.00725	0.00725	0.0145	5.15019	224.548	0.0064574	0.64574	control v2
20	0.862	0.856	0.854	0.834	0.832	0.006	0.002	0.02	0.002	0.0075	0.0075	0.015	4.56291	198.943	0.00753986	0.753986
21	1.048	1.046	1.032	1.024	1.018	0.002	0.014	0.008	0.006	0.0075	0.0075	0.015	5.52632	240.948	0.00622542	0.622542
22	0.875	0.869	0.865	0.854	0.85	0.006	0.004	0.011	0.004	0.00625	0.00625	0.0125	4.21977	183.982	0.00679414	0.679414	0.1mM JA
23	0.765	0.734	0.732	0.728	0.717	0.031	0.002	0.004	0.011	0.012	0.012	0.024	5.1403	224.117	0.0107087	1.07087
24	0.883	0.879	0.875	0.865	0.861	0.004	0.004	0.01	0.004	0.0055	0.0055	0.011	4.96213	216.349	0.00508438	0.508438
25	1.716	1.712	1.661	1.658	1.657	0.004	0.051	0.003	0.001	0.01475	0.01475	0.0295	4.51672	196.929	0.01498	1.498	1mM JA
26	1.891	1.89	1.874	1.871	1.869	0.001	0.016	0.003	0.002	0.0055	0.0055	0.011	4.12079	179.667	0.00612245	0.612245
27	0.887	0.881	0.877	0.878	0.879	0.006	0.004	-0.001	-0.001	0.002	0.002	0.004	4.04161	176.214	0.00226997	0.226997
28	0.923	0.908	0.843	0.834	0.812	0.015	0.065	0.009	0.022	0.02775	0.02775	0.0555	4.22637	184.27	0.0301189	3.01189	Aphid
29	0.938	0.936	0.953	0.943	0.862	0.002	-0.017	0.01	0.081	0.019	0.019	0.038	4.16038	181.393	0.020949	2.0949
30	1.492	1.467	1.463	1.458	1.423	0.025	0.004	0.005	0.035	0.01725	0.01725	0.0345	4.00201	174.488	0.0197722	1.97722
31	0.974	0.908	0.843	0.796	0.778	0.066	0.065	0.047	0.018	0.049	0.049	0.098	4.14059	180.53	0.0542847	5.42847	0.1mM+aphid
32	0.843	0.801	0.797	0.796	0.781	0.042	0.004	0.001	0.015	0.0155	0.0155	0.031	4.101	178.803	0.0173375	1.73375
33	0.745	0.732	0.725	0.709	0.693	0.013	0.007	0.016	0.016	0.013	0.013	0.026	4.0515	176.646	0.0147187	1.47187
34	0.289	0.287	0.268	0.223	0.199	0.002	0.019	0.045	0.024	0.0225	0.0225	0.045	4.0911	178.372	0.0252282	2.52282	1mMJA+aphid
35	0.899	0.789	0.765	0.756	0.721	0.11	0.024	0.009	0.035	0.0445	0.0445	0.089	4.04161	176.214	0.0505068	5.05068
36	0.934	0.933	0.943	0.912	0.892	0.001	-0.01	0.031	0.02	0.0105	0.0105	0.021	4.0614	177.077	0.0118592	1.18592
37	0	0	0	0	0	0	0	0	0	0	0	0	4.01191	174.919	0	0
38	0	0	0	0	0	0	0	0	0	0	0	0	4.00201	174.488	0	0
39	0	0	0	0	0	0	0	0	0	0	0	0	4.35835	190.024	0	0
40	0	0	0	0	0	0	0	0	0	0	0	0	4.12409	179.81	0	0
41	0	0	0	0	0	0	0	0	0	0	0	0	4.04161	176.214	0	0
42	0	0	0	0	0	0	0	0	0	0	0	0	4.27916	186.571	0	0
43	0	0	0	0	0	0	0	0	0	0	0	0	4.12079	179.667	0	0
44	0	0	0	0	0	0	0	0	0	0	0	0	4.14719	180.817	0	0
45	0	0	0	0	0	0	0	0	0	0	0	0	4.23957	184.845	0	0
46	0	0	0	0	0	0	0	0	0	0	0	0	4.25937	185.708	0	0
47	0	0	0	0	0	0	0	0	0	0	0	0	4.19008	182.687	0	0
48	0	0	0	0	0	0	0	0	0	0	0	0	4.22967	184.414	0	0
	0	0	0	0	0	0	0	0	0	0	0	0	4.20987	183.551	0	0
	0	0	0	0	0	0	0	0	0	0	0	0	4.23957	184.845	0	0
	0	0	0	0	0	0	0	0	0	0	0	0	4.31875	188.298	0	0
	0	0	0	0	0	0	0	0	0	0	0	0	4.25607	185.564	0	0
	0	0	0	0	0	0	0	0	0	0	0	0	3.98222	173.625	0	0
	0	0	0	0	0	0	0	0	0	0	0	0	4.35835	190.024	0	0
	0	0	0	0	0	0	0	0	0	0	0	0	4.02181	175.351	0	0
	0	0	0	0	0	0	0	0	0	0	0	0	4.12079	179.667	0	0
	0	0	0	0	0	0	0	0	0	0	0	0	3.99212	174.056	0	0
	0	0	0	0	0	0	0	0	0	0	0	0	3.96242	172.762	0	0
	0	0	0	0	0	0	0	0	0	0	0	0	3.67538	160.246	0	0
	0	0	0	0	0	0	0	0	0	0	0	0	3.87664	169.021	0	0
	0	0	0	0	0	0	0	0	0	0	0	0	4.12079	179.667	0	0
	0	0	0	0	0	0	0	0	0	0	0	0	3.99212	174.056	0	0
	0	0	0	0	0	0	0	0	0	0	0	0	4.03171	175.783	0	0
	0	0	0	0	0	0	0	0	0	0	0	0	4.04821	176.502	0	0
	0	0	0	0	0	0	0	0	0	0	0	0	4.00201	174.488	0	0
	0	0	0	0	0	0	0	0	0	0	0	0	4.0614	177.077	0	0
	0	0	0	0	0	0	0	0	0	0	0	0	4.47712	195.203	0	0
	0	0	0	0	0	0	0	0	0	0	0	0	4.18018	182.256	0	0
	0	0	0	0	0	0	0	0	0	0	0	0	3.99212	174.056	0	0
	0	0	0	0	0	0	0	0	0	0	0	0	3.68528	160.678	0	0
	0	0	0	0	0	0	0	0	0	0	0	0	3.36854	146.868	0	0
	0	0	0	0	0	0	0	0	0	0	0	0	3.68198	160.534	0	0
	0	0	0	0	0	0	0	0	0	0	0	0	3.39823	148.163	0	0
	0	0	0	0	0	0	0	0	0	0	0	0	3.10129	135.216	0	0
	0	0	0	0	0	0	0	0	0	0	0	0	4.101	178.803	0	0
	0	0	0	0	0	0	0	0	0	0	0	0	3.5335	154.061	0	0
	0	0	0	0	0	0	0	0	0	0	0	0	4.17028	181.824	0	0
	0	0	0	0	0	0	0	0	0	0	0	0	3.66548	159.815	0	0
	0	0	0	0	0	0	0	0	0	0	0	0	3.27945	142.984	0	0
	0	0	0	0	0	0	0	0	0	0	0	0	3.70507	161.541	0	0
	0	0	0	0	0	0	0	0	0	0	0	0	3.25966	142.121	0	0
	0	0	0	0	0	0	0	0	0	0	0	0	3.28935	143.416	0	0
	0	0	0	0	0	0	0	0	0	0	0	0	2.87363	125.29	0	0
	0	0	0	0	0	0	0	0	0	0	0	0	3.14088	136.942	0	0
	0	0	0	0	0	0	0	0	0	0	0	0	3.32894	145.142	0	0
	0	0	0	0	0	0	0	0	0	0	0	0	3.24976	141.689	0	0
	0	0	0	0	0	0	0	0	0	0	0	0	3.26956	142.553	0	0
	0	0	0	0	0	0	0	0	0	0	0	0	3.28275	143.128	0	0
	0	0	0	0	0	0	0	0	0	0	0	0	3.31905	144.71	0	0
	0	0	0	0	0	0	0	0	0	0	0	0	2.86373	124.859	0	0
	0	0	0	0	0	0	0	0	0	0	0	0	3.25966	142.121	0	0
	0	0	0	0	0	0	0	0	0	0	0	0	3.14748	137.23	0	0
	0	0	0	0	0	0	0	0	0	0	0	0	3.22006	140.395	0	0
	0	0	0	0	0	0	0	0	0	0	0	0	3.32894	145.142	0	0
	0	0	0	0	0	0	0	0	0	0	0	0	3.20027	139.532	0	0
	0	0	0	0	0	0	0	0	0	0	0	0	3.24976	141.689	0	0
	0	0	0	0	0	0	0	0	0	0	0	0	3.15078	137.374	0	0
	0	0	0	0	0	0	0	0	0	0	0	0	2.88353	125.722	0	0
	0	0	0	0	0	0	0	0	0	0	0	0	3.20027	139.532	0	0
	0	0	0	0	0	0	0	0	0	0	0	0	3.07819	134.209	0	0
	0	0	0	0	0	0	0	0	0	0	0	0	3.17057	138.237	0	0
	0	0	0	0	0	0	0	0	0	0	0	0	3.06169	133.49	0	0
	0	0	0	0	0	0	0	0	0	0	0	0	3.14088	136.942	0	0
	0	0	0	0	0	0	0	0	0	0	0	0	3.12438	136.223	0	0
	0	0	0	0	0	0	0	0	0	0	0	0	3.24976	141.689	0	0
	0	0	0	0	0	0	0	0	0	0	0	0	3.26956	142.553	0	0
	0	0	0	0	0	0	0	0	0	0	0	0	3.22006	140.395	0	0
	0	0	0	0	0	0	0	0	0	0	0	0	3.24646	141.546	0	0
	0	0	0	0	0	0	0	0	0	0	0	0	3.17057	138.237	0	0
	0	0	0	0	0	0	0	0	0	0	0	0	3.24976	141.689	0	0
	0	0	0	0	0	0	0	0	0	0	0	0	2.98251	130.037	0	0
	0	0	0	0	0	0	0	0	0	0	0	0	3.13428	136.655	0	0
	0	0	0	0	0	0	0	0	0	0	0	0	2.74496	119.68	0	0
	0	0	0	0	0	0	0	0	0	0	0	0	3.16068	137.805	0	0
	0	0	0	0	0	0	0	0	0	0	0	0	2.78455	121.406	0	0
	0	0	0	0	0	0	0	0	0	0	0	0	2.89673	126.297	0	0
	0	0	0	0	0	0	0	0	0	0	0	0	3.15078	137.374	0	0
	0	0	0	0	0	0	0	0	0	0	0	0	2.95282	128.743	0	0
	0	0	0	0	0	0	0	0	0	0	0	0	2.98251	130.037	0	0
	0	0	0	0	0	0	0	0	0	0	0	0	3.0287	132.051	0	0
	0	0	0	0	0	0	0	0	0	0	0	0	3.19037	139.1	0	0
	0	0	0	0	0	0	0	0	0	0	0	0	3.032	132.195	0	0
	0	0	0	0	0	0	0	0	0	0	0	0	3.20027	139.532	0	0
	0	0	0	0	0	0	0	0	0	0	0	0	3.14088	136.942	0	0
	0	0	0	0	0	0	0	0	0	0	0	0	3.0221	131.764	0	0
	0	0	0	0	0	0	0	0	0	0	0	0	2.89343	126.153	0	0
	0	0	0	0	0	0	0	0	0	0	0	0	3.0419	132.627	0	0
	0	0	0	0	0	0	0	0	0	0	0	0	2.98581	130.181	0	0
	0	0	0	0	0	0	0	0	0	0	0	0	4.34845	189.592	0	0
	0	0	0	0	0	0	0	0	0	0	0	0	4.43753	193.476	0	0
	0	0	0	0	0	0	0	0	0	0	0	0	4.39299	191.534	0	0
	0	0	0	0	0	0	0	0	0	0	0	0	4.41526	192.505	0	0
	0	0	0	0	0	0	0	0	0	0	0	0	4.40784	192.182	0	0
	0	0	0	0	0	0	0	0	0	0	0	0	3.73477	162.836	0	0
	0	0	0	0	0	0	0	0	0	0	0	0	4.0713	177.509	0	0
	0	0	0	0	0	0	0	0	0	0	0	0	3.90303	170.172	0	0
	0	0	0	0	0	0	0	0	0	0	0	0	4.32865	188.729	0	0
	0	0	0	0	0	0	0	0	0	0	0	0	4.35835	190.024	0	0
	0	0	0	0	0	0	0	0	0	0	0	0	4.3435	189.377	0	0
	0	0	0	0	0	0	0	0	0	0	0	0	4.35092	189.7	0	0
	0	0	0	0	0	0	0	0	0	0	0	0	4.38804	191.319	0	0
	0	0	0	0	0	0	0	0	0	0	0	0	4.16038	181.393	0	0
	0	0	0	0	0	0	0	0	0	0	0	0	4.27421	186.356	0	0
	0	0	0	0	0	0	0	0	0	0	0	0	4.2173	183.874	0	0
	0	0	0	0	0	0	0	0	0	0	0	0	3.66548	159.815	0	0
	0	0	0	0	0	0	0	0	0	0	0	0	4.11089	179.235	0	0
	0	0	0	0	0	0	0	0	0	0	0	0	3.88819	169.525	0	0
	0	0	0	0	0	0	0	0	0	0	0	0	3.99954	174.38	0	0
	0	0	0	0	0	0	0	0	0	0	0	0	4.33855	189.161	0	0
	0	0	0	0	0	0	0	0	0	0	0	0	3.37843	147.3	0	0
	0	0	0	0	0	0	0	0	0	0	0	0	3.85849	168.23	0	0
	0	0	0	0	0	0	0	0	0	0	0	0	3.61846	157.765	0	0
	0	0	0	0	0	0	0	0	0	0	0	0	3.36854	146.868	0	0
	0	0	0	0	0	0	0	0	0	0	0	0	3.93273	171.467	0	0
	0	0	0	0	0	0	0	0	0	0	0	0	3.65063	159.168	0	0
	0	0	0	0	0	0	0	0	0	0	0	0	3.79168	165.317	0	0
	0	0	0	0	0	0	0	0	0	0	0	0	3.77436	164.562	0	0
	0	0	0	0	0	0	0	0	0	0	0	0	3.36854	146.868	0	0
	0	0	0	0	0	0	0	0	0	0	0	0	3.57145	155.715	0	0
	0	0	0	0	0	0	0	0	0	0	0	0	3.46999	151.292	0	0
	0	0	0	0	0	0	0	0	0	0	0	0	3.33884	145.574	0	0
	0	0	0	0	0	0	0	0	0	0	0	0	3.25966	142.121	0	0
	0	0	0	0	0	0	0	0	0	0	0	0	3.29925	143.847	0	0
	0	0	0	0	0	0	0	0	0	0	0	0	3.27945	142.984	0	0
	0	0	0	0	0	0	0	0	0	0	0	0	3.21017	139.963	0	0
	0	0	0	0	0	0	0	0	0	0	0	0	2.74496	119.68	0	0
	0	0	0	0	0	0	0	0	0	0	0	0	2.97756	129.822	0	0
	0	0	0	0	0	0	0	0	0	0	0	0	2.86126	124.751	0	0
	0	0	0	0	0	0	0	0	0	0	0	0	2.75485	120.112	0	0
	0	0	0	0	0	0	0	0	0	0	0	0	3.44772	150.321	0	0
	0	0	0	0	0	0	0	0	0	0	0	0	3.10129	135.216	0	0
	0	0	0	0	0	0	0	0	0	0	0	0	3.2745	142.768	0	0
	0	0	0	0	0	0	0	0	0	0	0	0	3.39823	148.163	0	0
	0	0	0	0	0	0	0	0	0	0	0	0	3.42792	149.458	0	0
	0	0	0	0	0	0	0	0	0	0	0	0	3.41308	148.81	0	0
	0	0	0	0	0	0	0	0	0	0	0	0	3.4205	149.134	0	0
	0	0	0	0	0	0	0	0	0	0	0	0	2.88353	125.722	0	0
	0	0	0	0	0	0	0	0	0	0	0	0	2.75485	120.112	0	0
	0	0	0	0	0	0	0	0	0	0	0	0	2.81919	122.917	0	0
	0	0	0	0	0	0	0	0	0	0	0	0	2.78702	121.514	0	0
	0	0	0	0	0	0	0	0	0	0	0	0	2.77465	120.975	0	0
	0	0	0	0	0	0	0	0	0	0	0	0	2.56679	111.912	0	0
	0	0	0	0	0	0	0	0	0	0	0	0	2.67072	116.443	0	0
	0	0	0	0	0	0	0	0	0	0	0	0	2.61876	114.178	0	0
	0	0	0	0	0	0	0	0	0	0	0	0	2.70536	117.954	0	0
	0	0	0	0	0	0	0	0	0	0	0	0	3.34874	146.005	0	0
	0	0	0	0	0	0	0	0	0	0	0	0	3.02705	131.979	0	0
	0	0	0	0	0	0	0	0	0	0	0	0	3.1879	138.992	0	0
	0	0	0	0	0	0	0	0	0	0	0	0	3.43782	149.889	0	0
	0	0	0	0	0	0	0	0	0	0	0	0	2.73506	119.249	0	0
	0	0	0	0	0	0	0	0	0	0	0	0	3.08644	134.569	0	0
	0	0	0	0	0	0	0	0	0	0	0	0	2.91075	126.909	0	0
	0	0	0	0	0	0	0	0	0	0	0	0	3.58629	156.362	0	0
	0	0	0	0	0	0	0	0	0	0	0	0	3.63578	158.52	0	0
	0	0	0	0	0	0	0	0	0	0	0	0	3.61104	157.441	0	0
	0	0	0	0	0	0	0	0	0	0	0	0	3.62341	157.981	0	0
	0	0	0	0	0	0	0	0	0	0	0	0	4.50682	196.497	0	0
	0	0	0	0	0	0	0	0	0	0	0	0	4.53651	197.792	0	0
	0	0	0	0	0	0	0	0	0	0	0	0	4.52166	197.145	0	0
	0	0	0	0	0	0	0	0	0	0	0	0	4.52909	197.468	0	0
	0	0	0	0	0	0	0	0	0	0	0	0	4.22967	184.414	0	0
	0	0	0	0	0	0	0	0	0	0	0	0	3.66548	159.815	0	0
	0	0	0	0	0	0	0	0	0	0	0	0	3.94757	172.114	0	0
	0	0	0	0	0	0	0	0	0	0	0	0	3.80653	165.965	0	0
	0	0	0	0	0	0	0	0	0	0	0	0	4.26926	186.14	0	0
	0	0	0	0	0	0	0	0	0	0	0	0	4.93244	215.054	0	0
	0	0	0	0	0	0	0	0	0	0	0	0	4.60085	200.597	0	0
	0	0	0	0	0	0	0	0	0	0	0	0	4.76664	207.826	0	0
	0	0	0	0	0	0	0	0	0	0	0	0	3.46752	151.184	0	0
	0	0	0	0	0	0	0	0	0	0	0	0	3.49721	152.478	0	0
	0	0	0	0	0	0	0	0	0	0	0	0	3.48236	151.831	0	0
	0	0	0	0	0	0	0	0	0	0	0	0	3.48979	152.155	0	0
	0	0	0	0	0	0	0	0	0	0	0	0	4.01191	174.919	0	0
	0	0	0	0	0	0	0	0	0	0	0	0	3.5368	154.205	0	0
	0	0	0	0	0	0	0	0	0	0	0	0	3.77436	164.562	0	0
	0	0	0	0	0	0	0	0	0	0	0	0	3.65558	159.383	0	0
	0	0	0	0	0	0	0	0	0	0	0	0	4.11089	179.235	0	0
	0	0	0	0	0	0	0	0	0	0	0	0	3.44772	150.321	0	0
	0	0	0	0	0	0	0	0	0	0	0	0	3.77931	164.778	0	0
	0	0	0	0	0	0	0	0	0	0	0	0	3.61351	157.549	0	0
	0	0	0	0	0	0	0	0	0	0	0	0	3.46752	151.184	0	0
	0	0	0	0	0	0	0	0	0	0	0	0	3.5467	154.636	0	0
	0	0	0	0	0	0	0	0	0	0	0	0	3.50711	152.91	0	0
	0	0	0	0	0	0	0	0	0	0	0	0	3.52691	153.773	0	0
	0	0	0	0	0	0	0	0	0	0	0	0	3.5665	155.499	0	0
	0	0	0	0	0	0	0	0	0	0	0	0	3.44772	150.321	0	0
	0	0	0	0	0	0	0	0	0	0	0	0	3.50711	152.91	0	0
	0	0	0	0	0	0	0	0	0	0	0	0	3.47742	151.615	0	0
	0	0	0	0	0	0	0	0	0	0	0	0	3.52691	153.773	0	0
	0	0	0	0	0	0	0	0	0	0	0	0	3.15078	137.374	0	0
	0	0	0	0	0	0	0	0	0	0	0	0	3.33884	145.574	0	0
	0	0	0	0	0	0	0	0	0	0	0	0	3.24481	141.474	0	0
	0	0	0	0	0	0	0	0	0	0	0	0	3.47742	151.615	0	0
	0	0	0	0	0	0	0	0	0	0	0	0	3.26956	142.553	0	0
	0	0	0	0	0	0	0	0	0	0	0	0	3.37349	147.084	0	0
	0	0	0	0	0	0	0	0	0	0	0	0	3.32152	144.818	0	0
	0	0	0	0	0	0	0	0	0	0	0	0	3.36854	146.868	0	0
	0	0	0	0	0	0	0	0	0	0	0	0	3.44772	150.321	0	0
	0	0	0	0	0	0	0	0	0	0	0	0	3.40813	148.594	0	0
	0	0	0	0	0	0	0	0	0	0	0	0	3.42792	149.458	0	0
	0	0	0	0	0	0	0	0	0	0	0	0	2.63608	114.933	0	0
	0	0	0	0	0	0	0	0	0	0	0	0	2.67567	116.659	0	0
	0	0	0	0	0	0	0	0	0	0	0	0	2.65587	115.796	0	0
	0	0	0	0	0	0	0	0	0	0	0	0	2.66577	116.228	0	0
	0	0	0	0	0	0	0	0	0	0	0	0	3.47742	151.615	0	0
	0	0	0	0	0	0	0	0	0	0	0	0	2.69547	117.522	0	0
	0	0	0	0	0	0	0	0	0	0	0	0	3.08644	134.569	0	0
	0	0	0	0	0	0	0	0	0	0	0	0	2.89095	126.046	0	0
	0	0	0	0	0	0	0	0	0	0	0	0	2.85383	124.427	0	0
	0	0	0	0	0	0	0	0	0	0	0	0	2.75485	120.112	0	0
	0	0	0	0	0	0	0	0	0	0	0	0	2.80434	122.269	0	0
	0	0	0	0	0	0	0	0	0	0	0	0	2.7796	121.191	0	0
	0	0	0	0	0	0	0	0	0	0	0	0	2.57669	112.344	0	0
	0	0	0	0	0	0	0	0	0	0	0	0	3.63578	158.52	0	0
	0	0	0	0	0	0	0	0	0	0	0	0	3.10624	135.432	0	0
	0	0	0	0	0	0	0	0	0	0	0	0	3.37101	146.976	0	0

## Sheet: CAT mean
Sr. No.		Units/mg pro				Borlaug2015 V1						Zincol2015 V2
1	control v1	0.494324
2		0.308738				JA			JA+APHID					JA			JA+APHID
3		0.211944			CONTROL	0.1mM JA	1mM JA	Aphid	0.1mM+aphid	1mM+aphid			CONTROL	0.1mM JA	1mM JA	Aphid	0.1mM+aphid	1mM+aphid
4	0.1mM JA	2.32073		R1	0.494324	2.32073	3.85923	1.30447	2.23521	0.458357		R1	0.64574	5.32661	4.64635	2.06219	0.332355	0.252282
5		1.1441		R2	0.308738	1.1441	1.37974	1.76739	0.231554	0.21146		R2	0.753986	0.267717	0.890539	3.8039	0.475382	0.113498
6		0.720251		R3	0.211944	0.720251	2.48092	2.8289	0.204463	0.682616		R3	0.622542	0.392884	0.340495	0.143276	0.311358	0.197654
7	1mM JA	6.61214		AVERAGE	0.338335	1.39503	2.5733	1.96692	0.890408	0.450811		AVERAGE	0.674089	1.99574	1.95913	2.00312	0.373032	0.187811
8		1.37974		SD	0.143498	0.829219	1.24232	0.781553	1.16471	0.235669		SD	0.0701579	2.8853	2.3434	1.83103	0.0892578	0.0699134
9		2.48092		SE	0.0828509	0.478764	0.717276	0.451243	0.672465	0.136067		SE	0.0405068	1.66588	1.353	1.05717	0.0515345	0.0403657
10	Aphid	1.30447
11		1.76739			Borlaug-2015	Zincol-2015
12		2.8289		Control	0.338335	0.674089
13	0.1mM+aphid	2.23521		0.1 Mm JA	1.39503	1.99574
14		0.231554		1 mM JA	2.5733	1.95913
15		0.204463		Aphid	1.96692	2.00312
16	1mMJA+aphid	0.458357		0.1 mM + aphid	0.890408	0.373032
17		0.21146		1 mM JA + aphid	0.450811	0.187811
18		0.682616
19	control v2	0.64574
20		0.753986		Control
21		0.622542		0.1 Mm JA
22	0.1mM JA	5.32661		1 mM JA
23		0.267717		Aphid
24		0.392884		0.1 mM + aphid
25	1mM JA	0.279289		1 mM JA + aphid
26		0.890539
27		0.340495
28	Aphid	2.06219
29		3.8039
30		0.143276
31	0.1mM+aphid	0.332355
32		0.475382
33		0.311358
34	1mMJA+aphid	0.252282
35		0.113498
36		0.197654
37

## Sheet: cAT MEAN 2
Sr. No.		Units/mg pro				Borlaug2015 V1						Zincol2015 V2
1	control v1	0.494324
2		0.308738				JA			JA+APHID					JA			JA+APHID
3		0.211944			CONTROL	0.1mM JA	1mM JA	Aphid	0.1mM+aphid	1mM+aphid			CONTROL	0.1mM JA	1mM JA	Aphid	0.1mM+aphid	1mM+aphid
4	0.1mM JA	1.01695		R1	0.494324	1.01695	1.1835	1.33165	2.23521	3.08118		R1	0.64574	0.679414	1.498	5.31829	5.42847	1.45763
5		0.898935		R2	0.308738	0.898935	0.212267	1.38318	2.80437	2.85471		R2	0.753986	1.07087	0.612245	2.0949	2.01338	1.73085
6		0.960335		R3	0.211944	0.960335	0.25843	2.61935	0.204463	0.682616		R3	0.622542	0.508438	0.226997	3.98309	0.962379	0.197654
7	1mM JA	1.1835		AVERAGE	0.338335	0.95874	0.551398	1.77806	1.74801	2.20617		AVERAGE	0.674089	0.752907	0.779082	3.79876	2.80141	1.12871
8		0.212267		SD	0.143498	0.0590229	0.5479	0.729034	1.36671	1.32429		SD	0.0701579	0.288328	0.651721	1.61958	2.335	0.81781
9		0.25843		SE	0.0828509	0.0340779	0.316339	0.420921	0.789094	0.764599		SE	0.0405068	0.166471	0.376282	0.935092	1.34815	0.472176
10	Aphid	1.33165
11		1.38318			Borlaug-2015	Zincol-2015
12		2.61935		Control	0.338335	0.674089
13	0.1mM+aphid	2.23521		0.1 Mm JA	0.95874	0.752907
14		2.80437		1 mM JA	0.551398	0.779082
15		0.204463		Aphid	1.77806	3.79876
16	1mMJA+aphid	3.08118		0.1 mM + aphid	1.74801	2.80141
17		2.85471		1 mM JA + aphid	2.20617	1.12871
18		0.682616
19	control v2	0.64574
20		0.753986
21		0.622542		Control
22	0.1mM JA	0.679414		0.1 Mm JA
23		1.07087		1 mM JA
24		0.508438		Aphid
25	1mM JA	1.498		0.1 mM + aphid
26		0.612245		1 mM JA + aphid
27		0.226997
28	Aphid	5.31829
29		2.0949
30		3.98309
31	0.1mM+aphid	5.42847
32		2.01338
33		0.962379
34	1mMJA+aphid	1.45763
35		1.73085
36		0.197654
37

## Sheet: CAT mean3
Sr. No.						Borlaug2015 V1						Zincol2015 V2
1	control v1	0.182119
2		0.28301				JA			JA+APHID					JA			JA+APHID
3		3.09968			CONTROL	0.1mM JA	1mM JA	Aphid	0.1mM+aphid	1mM+aphid			CONTROL	0.1mM JA	1mM JA	Aphid	0.1mM+aphid	1mM+aphid
4	0.1mM JA	2.47718		R1	0.182119	2.47718	0.308738	4.89178	1.80826	4.09975		R1	0.267203	0.326119	1.29488	4.96555	2.04953	0.756846
5		0.245164		R2	0.28301	0.245164	0.212267	2.25407	0.617476	1.66525		R2	0.452391	0.178478	0.807051	3.08722	2.54469	1.7876
6		0.213408		R3	3.09968	0.213408	0.43933	1.12632	2.07019	1.82941		R3	0.539536	0.878211	0.453993	2.55032	0.113221	2.03301
7	1mM JA	0.308738		AVERAGE	1.18827	0.978585	0.320112	2.75739	1.49864	2.53147		AVERAGE	0.41971	0.460936	0.851976	3.53436	1.56915	1.52582
8		0.212267		SD	1.6561	1.29792	0.113958	1.93253	0.774269	1.36065		SD	0.139077	0.368834	0.422242	1.26818	1.28495	0.677161
9		0.43933		SE	0.956177	0.749377	0.0657955	1.11578	0.447037	0.785594		SE	0.0802985	0.212952	0.243789	0.732205	0.741886	0.39097
10	Aphid	4.89178
11		2.25407			Borlaug-2015	Zincol-2015
12		1.12632		Control	1.18827	0.41971
13	0.1mM+aphid	1.80826		0.1 Mm JA	0.978585	0.460936
14		0.617476		1 mM JA	0.320112	0.851976
15		2.07019		Aphid	2.75739	3.53436
16	1mMJA+aphid	4.09975		0.1 mM + aphid	1.49864	1.56915
17		1.66525		1 mM JA + aphid	2.53147	1.52582
18		1.82941
19	control v2	0.267203
20		0.452391
21		0.539536
22	0.1mM JA	0.326119
23		0.178478
24		0.878211
25	1mM JA	1.29488
26		0.807051
27		0.453993
28	Aphid	4.96555
29		3.08722
30		2.55032
31	0.1mM+aphid	2.04953
32		2.54469
33		0.113221
34	1mMJA+aphid	0.756846
35		1.7876
36		2.03301
37

## Sheet: CAT mean4
Sr. No.		Units/mg pro				Borlaug2015 V1						Zincol2015 V2
1	control v1	0.494324
2		0.308738				JA			JA+APHID					JA			JA+APHID
3		0.211944			CONTROL	0.1mM JA	1mM JA	Aphid	0.1mM+aphid	1mM+aphid			CONTROL	0.1mM JA	1mM JA	Aphid	0.1mM+aphid	1mM+aphid
4	0.1mM JA	0.704041		R1	0.494324	0.704041	0.514564	1.82083	2.68727	3.46314		R1	0.64574	0.679414	1.498	3.01189	5.42847	2.52282
5		0.871695		R2	0.308738	0.871695	0.212267	2.8432	3.70486	3.4891		R2	0.753986	1.07087	0.612245	2.0949	1.73375	5.05068
6		0.880307		R3	0.211944	0.880307	0.25843	2.61935	1.15011	1.11949		R3	0.622542	0.508438	0.226997	1.97722	1.47187	1.18592
7	1mM JA	0.514564		AVERAGE	0.338335	0.818681	0.32842	2.42779	2.51408	2.69058		AVERAGE	0.674089	0.752907	0.779082	2.36134	2.87803	2.91981
8		0.212267		SD	0.143498	0.0993743	0.162849	0.53743	1.28615	1.36066		SD	0.0701579	0.288328	0.651721	0.56646	2.21262	1.96272
9		0.25843		SE	0.0828509	0.0573755	0.0940236	0.310295	0.742582	0.785602		SE	0.0405068	0.166471	0.376282	0.327055	1.2775	1.13321
10	Aphid	1.82083
11		2.8432
12		2.61935			Borlaug-2015	Zincol-2015
13	0.1mM+aphid	2.68727		Control	1.12779	1.19134
14		3.70486		0.1 mM JA	1.18681	1.75291
15		1.15011		1 mM JA	1.85842	2.35256
16	1mMJA+aphid	3.46314		Aphid	0.83353	0.974089
17		3.4891		0.1 mM + aphid	2.51408	2.77803
18		1.11949		1 mM JA + aphid	2.69058	2.91981
19	control v2	0.64574
20		0.753986
21		0.622542
22	0.1mM JA	0.679414
23		1.07087
24		0.508438
25	1mM JA	1.498
26		0.612245
27		0.226997
28	Aphid	3.01189
29		2.0949
30		1.97722
31	0.1mM+aphid	5.42847
32		1.73375
33		1.47187
34	1mMJA+aphid	2.52282
35		5.05068
36		1.18592
37		0
