# Supplementary material for: Exploring the effect of Jasmonic Acid for Aphids control for improving the yield of Triticum aestivum varieties
Source: PeerJ. 2022 Oct 27;10:e14018. doi: 10.7717/peerj.14018 (PMC9618260; doi:10.7717/peerj.14018)
Supplement: Supplemental Information 7 [file peerj-10-14018-s007.xls]

## Sheet: TSP 1
	Soluble proteins
	Absorbance	Concentrations
		Conc.
	0	0
	0.244	200
	0.488	400
	0.667	600
	0.859	800
	1.074	1000
	1.196	1200
	soluble proteins
	Y	X
	Sample No.	soluble protiens	Concentration		mg/ml	ug/5ul	mg/5ul
control v1	1	1.021	970.332	9703.32	9.70332	48.5166	0.0485166	4.85166
	2	0.866	816.911	8169.11	8.16911	40.8456	0.0408456	4.08456
	3	0.81	761.482	7614.82	7.61482	38.0741	0.0380741	3.80741
0.1mM JA	4	0.771	722.88	7228.8	7.2288	36.144	0.036144	3.6144
	5	0.78	731.788	7317.88	7.31788	36.5894	0.0365894	3.65894
	6	0.456	411.089	4110.89	4.11089	20.5545	0.0205545	2.05545
1mM JA	7	0.463	418.018	4180.18	4.18018	20.9009	0.0209009	2.09009
	8	0.734	686.257	6862.57	6.86257	34.3128	0.0343128	3.43128
	9	0.743	695.165	6951.65	6.95165	34.7582	0.0347582	3.47582
Aphid	10	0.456	411.089	4110.89	4.11089	20.5545	0.0205545	2.05545
	11	0.367	322.996	3229.96	3.22996	16.1498	0.0161498	1.61498
	12	0.321	277.465	2774.65	2.77465	13.8733	0.0138733	1.38733
0.1mM+aphid	13	0.564	517.989	5179.89	5.17989	25.8994	0.0258994	2.58994
	14	0.451	406.14	4061.4	4.0614	20.307	0.020307	2.0307
	15	0.345	301.22	3012.2	3.0122	15.061	0.015061	1.5061
1mMJA+aphid	16	0.413	368.528	3685.28	3.68528	18.4264	0.0184264	1.84264
	17	0.345	301.22	3012.2	3.0122	15.061	0.015061	1.5061
	18	0.342	298.251	2982.51	2.98251	14.9126	0.0149126	1.49126
control v2	19	0.762	713.971	7139.71	7.13971	35.6986	0.0356986	3.56986
	20	0.656	609.051	6090.51	6.09051	30.4526	0.0304526	3.04526
	21	0.877	827.799	8277.99	8.27799	41.39	0.04139	4.139
0.1mM JA	22	0.766	717.93	7179.3	7.1793	35.8965	0.0358965	3.58965
	23	1.011	960.434	9604.34	9.60434	48.0217	0.0480217	4.80217
	24	0.544	498.193	4981.93	4.98193	24.9096	0.0249096	2.49096
1mM JA	25	0.753	705.063	7050.63	7.05063	35.2531	0.0352531	3.52531
	26	0.763	714.961	7149.61	7.14961	35.7481	0.0357481	3.57481
	27	0.946	896.096	8960.96	8.96096	44.8048	0.0448048	4.48048
Aphid	28	0.531	485.325	4853.25	4.85325	24.2663	0.0242663	2.42663
	29	0.314	270.536	2705.36	2.70536	13.5268	0.0135268	1.35268
	30	0.267	224.015	2240.15	2.24015	11.2008	0.0112008	1.12008
0.1mM+aphid	31	0.613	566.49	5664.9	5.6649	28.3245	0.0283245	2.83245
	32	0.545	499.182	4991.82	4.99182	24.9591	0.0249591	2.49591
	33	0.585	538.775	5387.75	5.38775	26.9387	0.0269387	2.69387
1mMJA+aphid	34	0.214	171.555	1715.55	1.71555	8.57777	0.00857777	0.857777
	35	0.254	211.148	2111.48	2.11148	10.5574	0.0105574	1.05574
	36	0.315	271.526	2715.26	2.71526	13.5763	0.0135763	1.35763
			-40.264	-402.64	-0.40264	-2.0132	-0.0020132	-0.20132
		0	-40.264	-402.64	-0.40264	-2.0132	-0.0020132	-0.20132
		0	-40.264	-402.64	-0.40264	-2.0132	-0.0020132	-0.20132
		0	-40.264	-402.64	-0.40264	-2.0132	-0.0020132	-0.20132
		0	-40.264	-402.64	-0.40264	-2.0132	-0.0020132	-0.20132
		0	-40.264	-402.64	-0.40264	-2.0132	-0.0020132	-0.20132
		0	-40.264	-402.64	-0.40264	-2.0132	-0.0020132	-0.20132
		0	-40.264	-402.64	-0.40264	-2.0132	-0.0020132	-0.20132
		0	-40.264	-402.64	-0.40264	-2.0132	-0.0020132	-0.20132
		0	-40.264	-402.64	-0.40264	-2.0132	-0.0020132	-0.20132
		0	-40.264	-402.64	-0.40264	-2.0132	-0.0020132	-0.20132
		0	-40.264	-402.64	-0.40264	-2.0132	-0.0020132	-0.20132
		0	-40.264	-402.64	-0.40264	-2.0132	-0.0020132	-0.20132
		0	-40.264	-402.64	-0.40264	-2.0132	-0.0020132	-0.20132
		0	-40.264	-402.64	-0.40264	-2.0132	-0.0020132	-0.20132
		0	-40.264	-402.64	-0.40264	-2.0132	-0.0020132	-0.20132
		0	-40.264	-402.64	-0.40264	-2.0132	-0.0020132	-0.20132
		0	-40.264	-402.64	-0.40264	-2.0132	-0.0020132	-0.20132
		0	-40.264	-402.64	-0.40264	-2.0132	-0.0020132	-0.20132
		0	-40.264	-402.64	-0.40264	-2.0132	-0.0020132	-0.20132
		0	-40.264	-402.64	-0.40264	-2.0132	-0.0020132	-0.20132
		0	-40.264	-402.64	-0.40264	-2.0132	-0.0020132	-0.20132
		0	-40.264	-402.64	-0.40264	-2.0132	-0.0020132	-0.20132
		0	-40.264	-402.64	-0.40264	-2.0132	-0.0020132	-0.20132
		0	-40.264	-402.64	-0.40264	-2.0132	-0.0020132	-0.20132
		0	-40.264	-402.64	-0.40264	-2.0132	-0.0020132	-0.20132
		0	-40.264	-402.64	-0.40264	-2.0132	-0.0020132	-0.20132
		0	-40.264	-402.64	-0.40264	-2.0132	-0.0020132	-0.20132
		0	-40.264	-402.64	-0.40264	-2.0132	-0.0020132	-0.20132
		0	-40.264	-402.64	-0.40264	-2.0132	-0.0020132	-0.20132
		0	-40.264	-402.64	-0.40264	-2.0132	-0.0020132	-0.20132
		0	-40.264	-402.64	-0.40264	-2.0132	-0.0020132	-0.20132
		0	-40.264	-402.64	-0.40264	-2.0132	-0.0020132	-0.20132
		0	-40.264	-402.64	-0.40264	-2.0132	-0.0020132	-0.20132
		0	-40.264	-402.64	-0.40264	-2.0132	-0.0020132	-0.20132
		0	-40.264	-402.64	-0.40264	-2.0132	-0.0020132	-0.20132
		0	-40.264	-402.64	-0.40264	-2.0132	-0.0020132	-0.20132
		0	-40.264	-402.64	-0.40264	-2.0132	-0.0020132	-0.20132
		0	-40.264	-402.64	-0.40264	-2.0132	-0.0020132	-0.20132
		0	-40.264	-402.64	-0.40264	-2.0132	-0.0020132	-0.20132
		0	-40.264	-402.64	-0.40264	-2.0132	-0.0020132	-0.20132
		0	-40.264	-402.64	-0.40264	-2.0132	-0.0020132	-0.20132
		0	-40.264	-402.64	-0.40264	-2.0132	-0.0020132	-0.20132
		0	-40.264	-402.64	-0.40264	-2.0132	-0.0020132	-0.20132
		0	-40.264	-402.64	-0.40264	-2.0132	-0.0020132	-0.20132
		0	-40.264	-402.64	-0.40264	-2.0132	-0.0020132	-0.20132
		0	-40.264	-402.64	-0.40264	-2.0132	-0.0020132	-0.20132			83	1.102	1050.51	10505.1	10.5051	52.5253	0.0525253
		0	-40.264	-402.64	-0.40264	-2.0132	-0.0020132	-0.20132			84	0.871	821.861	8218.61	8.21861	41.093	0.041093
		0	-40.264	-402.64	-0.40264	-2.0132	-0.0020132	-0.20132			85	1.062	1010.91	10109.1	10.1091	50.5457	0.0505457
		0	-40.264	-402.64	-0.40264	-2.0132	-0.0020132	-0.20132			86	1.056	1004.98	10049.8	10.0498	50.2488	0.0502488
		0	-40.264	-402.64	-0.40264	-2.0132	-0.0020132	-0.20132			87	0.934	884.219	8842.19	8.84219	44.2109	0.0442109
		0	-40.264	-402.64	-0.40264	-2.0132	-0.0020132	-0.20132			88	0.9	850.565	8505.65	8.50565	42.5282	0.0425282
		0	-40.264	-402.64	-0.40264	-2.0132	-0.0020132	-0.20132			89	1.169	1116.82	11168.2	11.1682	55.8412	0.0558412
		0	-40.264	-402.64	-0.40264	-2.0132	-0.0020132	-0.20132			90	0.908	858.483	8584.83	8.58483	42.9242	0.0429242
		0	-40.264	-402.64	-0.40264	-2.0132	-0.0020132	-0.20132			91	1.085	1033.68	10336.8	10.3368	51.684	0.051684
		0	-40.264	-402.64	-0.40264	-2.0132	-0.0020132	-0.20132			92	1.102	1050.51	10505.1	10.5051	52.5253	0.0525253
		0	-40.264	-402.64	-0.40264	-2.0132	-0.0020132	-0.20132			93	0.642	595.194	5951.94	5.95194	29.7597	0.0297597
		0	-40.264	-402.64	-0.40264	-2.0132	-0.0020132	-0.20132			94	0.942	892.137	8921.37	8.92137	44.6069	0.0446069
		0	-40.264	-402.64	-0.40264	-2.0132	-0.0020132	-0.20132			95	1.048	997.057	9970.57	9.97057	49.8528	0.0498528
		0	-40.264	-402.64	-0.40264	-2.0132	-0.0020132	-0.20132			96	0.824	775.339	7753.39	7.75339	38.767	0.038767
		0	-40.264	-402.64	-0.40264	-2.0132	-0.0020132	-0.20132			97	1.103	1051.5	10515	10.515	52.5748	0.0525748
		0	-40.264	-402.64	-0.40264	-2.0132	-0.0020132	-0.20132			98	0.93	880.259	8802.59	8.80259	44.013	0.044013
		0	-40.264	-402.64	-0.40264	-2.0132	-0.0020132	-0.20132			99	0.999	948.556	9485.56	9.48556	47.4278	0.0474278
		0	-40.264	-402.64	-0.40264	-2.0132	-0.0020132	-0.20132			100	1.155	1102.97	11029.7	11.0297	55.1483	0.0551483
		0	-40.264	-402.64	-0.40264	-2.0132	-0.0020132	-0.20132			101	0.412	367.538	3675.38	3.67538	18.3769	0.0183769
		0	-40.264	-402.64	-0.40264	-2.0132	-0.0020132	-0.20132			102	0.357	313.098	3130.98	3.13098	15.6549	0.0156549
		0	-40.264	-402.64	-0.40264	-2.0132	-0.0020132	-0.20132			103	0.516	470.478	4704.78	4.70478	23.5239	0.0235239
		0	-40.264	-402.64	-0.40264	-2.0132	-0.0020132	-0.20132			104	0.948	898.076	8980.76	8.98076	44.9038	0.0449038
		0	-40.264	-402.64	-0.40264	-2.0132	-0.0020132	-0.20132			105	1.127	1075.25	10752.5	10.7525	53.7626	0.0537626
		0	-40.264	-402.64	-0.40264	-2.0132	-0.0020132	-0.20132			106	0.914	864.422	8644.22	8.64422	43.2211	0.0432211
		0	-40.264	-402.64	-0.40264	-2.0132	-0.0020132	-0.20132			107	1.15	1098.02	10980.2	10.9802	54.9009	0.0549009
		0	-40.264	-402.64	-0.40264	-2.0132	-0.0020132	-0.20132			108	1.015	964.393	9643.93	9.64393	48.2197	0.0482197
		0	-40.264	-402.64	-0.40264	-2.0132	-0.0020132	-0.20132			109	0.417	372.487	3724.87	3.72487	18.6243	0.0186243
		0	-40.264	-402.64	-0.40264	-2.0132	-0.0020132	-0.20132			110	0.894	844.626	8446.26	8.44626	42.2313	0.0422313
		0	-40.264	-402.64	-0.40264	-2.0132	-0.0020132	-0.20132			111	0.411	366.548	3665.48	3.66548	18.3274	0.0183274
		0	-40.264	-402.64	-0.40264	-2.0132	-0.0020132	-0.20132			112	0.972	921.831	9218.31	9.21831	46.0916	0.0460916
		0	-40.264	-402.64	-0.40264	-2.0132	-0.0020132	-0.20132			113	0.963	912.923	9129.23	9.12923	45.6462	0.0456462
		0	-40.264	-402.64	-0.40264	-2.0132	-0.0020132	-0.20132			114	1.028	977.261	9772.61	9.77261	48.863	0.048863
		0	-40.264	-402.64	-0.40264	-2.0132	-0.0020132	-0.20132			115	0.957	906.984	9069.84	9.06984	45.3492	0.0453492
		0	-40.264	-402.64	-0.40264	-2.0132	-0.0020132	-0.20132			116	1.085	1033.68	10336.8	10.3368	51.684	0.051684
		0	-40.264	-402.64	-0.40264	-2.0132	-0.0020132	-0.20132			117	0.605	558.571	5585.71	5.58571	27.9286	0.0279286
		0	-40.264	-402.64	-0.40264	-2.0132	-0.0020132	-0.20132			118	0.7	652.603	6526.03	6.52603	32.6302	0.0326302
		0	-40.264	-402.64	-0.40264	-2.0132	-0.0020132	-0.20132			119	1.03	979.24	9792.4	9.7924	48.962	0.048962
		0	-40.264	-402.64	-0.40264	-2.0132	-0.0020132	-0.20132			120	0.509	463.549	4635.49	4.63549	23.1775	0.0231775
		0	-40.264	-402.64	-0.40264	-2.0132	-0.0020132	-0.20132			121	0.796	747.625	7476.25	7.47625	37.3812	0.0373812
		0	-40.264	-402.64	-0.40264	-2.0132	-0.0020132	-0.20132			122	1.135	1083.17	10831.7	10.8317	54.1585	0.0541585
		0	-40.264	-402.64	-0.40264	-2.0132	-0.0020132	-0.20132			123	0.63	583.316	5833.16	5.83316	29.1658	0.0291658
		0	-40.264	-402.64	-0.40264	-2.0132	-0.0020132	-0.20132			124	1.035	984.189	9841.89	9.84189	49.2095	0.0492095
		0	-40.264	-402.64	-0.40264	-2.0132	-0.0020132	-0.20132			125	1.002	951.526	9515.26	9.51526	47.5763	0.0475763
		0	-40.264	-402.64	-0.40264	-2.0132	-0.0020132	-0.20132			126	0.869	819.881	8198.81	8.19881	40.994	0.040994
		0	-40.264	-402.64	-0.40264	-2.0132	-0.0020132	-0.20132			127	0.906	856.504	8565.04	8.56504	42.8252	0.0428252
		0	-40.264	-402.64	-0.40264	-2.0132	-0.0020132	-0.20132			128	0.357	313.098	3130.98	3.13098	15.6549	0.0156549
		0	-40.264	-402.64	-0.40264	-2.0132	-0.0020132	-0.20132			129	1.042	991.118	9911.18	9.91118	49.5559	0.0495559
		0	-40.264	-402.64	-0.40264	-2.0132	-0.0020132	-0.20132			130	0.713	665.471	6654.71	6.65471	33.2735	0.0332735
		0	-40.264	-402.64	-0.40264	-2.0132	-0.0020132	-0.20132			131	0.803	754.553	7545.53	7.54553	37.7277	0.0377277
		0	-40.264	-402.64	-0.40264	-2.0132	-0.0020132	-0.20132			132	0.618	571.439	5714.39	5.71439	28.5719	0.0285719
		0	-40.264	-402.64	-0.40264	-2.0132	-0.0020132	-0.20132			133	0.858	808.993	8089.93	8.08993	40.4496	0.0404496
		0	-40.264	-402.64	-0.40264	-2.0132	-0.0020132	-0.20132			134	0.117	75.5438	755.438	0.755438	3.77719	0.00377719
		0	-40.264	-402.64	-0.40264	-2.0132	-0.0020132	-0.20132			135	0.697	649.634	6496.34	6.49634	32.4817	0.0324817
		0	-40.264	-402.64	-0.40264	-2.0132	-0.0020132	-0.20132			136	0.223	180.464	1804.64	1.80464	9.02318	0.00902318
		0	-40.264	-402.64	-0.40264	-2.0132	-0.0020132	-0.20132			137	0.739	691.206	6912.06	6.91206	34.5603	0.0345603
		0	-40.264	-402.64	-0.40264	-2.0132	-0.0020132	-0.20132			138	1.142	1090.1	10901	10.901	54.505	0.054505
		0	-40.264	-402.64	-0.40264	-2.0132	-0.0020132	-0.20132			139	0.909	859.473	8594.73	8.59473	42.9737	0.0429737
		0	-40.264	-402.64	-0.40264	-2.0132	-0.0020132	-0.20132			140	1.162	1109.9	11099	11.099	55.4948	0.0554948
		0	-40.264	-402.64	-0.40264	-2.0132	-0.0020132	-0.20132			141	0.781	732.778	7327.78	7.32778	36.6389	0.0366389
		0	-40.264	-402.64	-0.40264	-2.0132	-0.0020132	-0.20132			142	0.747	699.124	6991.24	6.99124	34.9562	0.0349562
		0	-40.264	-402.64	-0.40264	-2.0132	-0.0020132	-0.20132			143	0.934	884.219	8842.19	8.84219	44.2109	0.0442109
		0	-40.264	-402.64	-0.40264	-2.0132	-0.0020132	-0.20132			144	0.721	673.389	6733.89	6.73389	33.6695	0.0336695
		0	-40.264	-402.64	-0.40264	-2.0132	-0.0020132	-0.20132			145	1.093	1041.6	10416	10.416	52.0799	0.0520799
		0	-40.264	-402.64	-0.40264	-2.0132	-0.0020132	-0.20132			146	0.977	926.78	9267.8	9.2678	46.339	0.046339
		0	-40.264	-402.64	-0.40264	-2.0132	-0.0020132	-0.20132			147	0.594	547.683	5476.83	5.47683	27.3842	0.0273842
		0	-40.264	-402.64	-0.40264	-2.0132	-0.0020132	-0.20132			148	1.028	977.261	9772.61	9.77261	48.863	0.048863
		0	-40.264	-402.64	-0.40264	-2.0132	-0.0020132	-0.20132			149	0.517	471.468	4714.68	4.71468	23.5734	0.0235734
		0	-40.264	-402.64	-0.40264	-2.0132	-0.0020132	-0.20132			150	0.903	853.534	8535.34	8.53534	42.6767	0.0426767
		0	-40.264	-402.64	-0.40264	-2.0132	-0.0020132	-0.20132			151	0.739	691.206	6912.06	6.91206	34.5603	0.0345603
		0	-40.264	-402.64	-0.40264	-2.0132	-0.0020132	-0.20132			152	0.345	301.22	3012.2	3.0122	15.061	0.015061
		0	-40.264	-402.64	-0.40264	-2.0132	-0.0020132	-0.20132			153	0.638	591.235	5912.35	5.91235	29.5617	0.0295617
		0	-40.264	-402.64	-0.40264	-2.0132	-0.0020132	-0.20132			154	0.532	486.315	4863.15	4.86315	24.3157	0.0243157
		0	-40.264	-402.64	-0.40264	-2.0132	-0.0020132	-0.20132			155	1.043	992.108	9921.08	9.92108	49.6054	0.0496054
		0	-40.264	-402.64	-0.40264	-2.0132	-0.0020132	-0.20132			156	1.026	975.281	9752.81	9.75281	48.7641	0.0487641
		0	-40.264	-402.64	-0.40264	-2.0132	-0.0020132	-0.20132			157	0.731	683.287	6832.87	6.83287	34.1644	0.0341644
		0	-40.264	-402.64	-0.40264	-2.0132	-0.0020132	-0.20132			158	1.048	997.057	9970.57	9.97057	49.8528	0.0498528
		0	-40.264	-402.64	-0.40264	-2.0132	-0.0020132	-0.20132			159	0.509	463.549	4635.49	4.63549	23.1775	0.0231775
		0	-40.264	-402.64	-0.40264	-2.0132	-0.0020132	-0.20132			160	0.337	293.302	2933.02	2.93302	14.6651	0.0146651
		0	-40.264	-402.64	-0.40264	-2.0132	-0.0020132	-0.20132			161	0.899	849.575	8495.75	8.49575	42.4788	0.0424788
		0	-40.264	-402.64	-0.40264	-2.0132	-0.0020132	-0.20132			162	1.056	1004.98	10049.8	10.0498	50.2488	0.0502488
		0	-40.264	-402.64	-0.40264	-2.0132	-0.0020132	-0.20132			163	1.137	1085.15	10851.5	10.8515	54.2575	0.0542575
		0	-40.264	-402.64	-0.40264	-2.0132	-0.0020132	-0.20132			164	0.95	900.055	9000.56	9.00056	45.0028	0.0450028
		0	-40.264	-402.64	-0.40264	-2.0132	-0.0020132	-0.20132			165	0.623	576.388	5763.88	5.76388	28.8194	0.0288194
		0	-40.264	-402.64	-0.40264	-2.0132	-0.0020132	-0.20132			166	0.557	511.06	5110.6	5.1106	25.553	0.025553
		0	-40.264	-402.64	-0.40264	-2.0132	-0.0020132	-0.20132			167	0.876	826.81	8268.1	8.2681	41.3405	0.0413405
		0	-40.264	-402.64	-0.40264	-2.0132	-0.0020132	-0.20132			168	0.737	689.226	6892.26	6.89226	34.4613	0.0344613
		0	-40.264	-402.64	-0.40264	-2.0132	-0.0020132	-0.20132			169	0.85	801.074	8010.74	8.01074	40.0537	0.0400537
		0	-40.264	-402.64	-0.40264	-2.0132	-0.0020132	-0.20132			170	0.93	880.259	8802.59	8.80259	44.013	0.044013
		0	-40.264	-402.64	-0.40264	-2.0132	-0.0020132	-0.20132			171	0.89	840.667	8406.67	8.40667	42.0333	0.0420333
		0	-40.264	-402.64	-0.40264	-2.0132	-0.0020132	-0.20132			172	0.864	814.932	8149.32	8.14932	40.7466	0.0407466
		0	-40.264	-402.64	-0.40264	-2.0132	-0.0020132	-0.20132			173	0.511	465.529	4655.29	4.65529	23.2764	0.0232764
		0	-40.264	-402.64	-0.40264	-2.0132	-0.0020132	-0.20132			174	0.861	811.962	8119.62	8.11962	40.5981	0.0405981
		0	-40.264	-402.64	-0.40264	-2.0132	-0.0020132	-0.20132			175	1.094	1042.59	10425.9	10.4259	52.1294	0.0521294
		0	-40.264	-402.64	-0.40264	-2.0132	-0.0020132	-0.20132			176	0.94	890.157	8901.57	8.90157	44.5079	0.0445079
		0	-40.264	-402.64	-0.40264	-2.0132	-0.0020132	-0.20132			177	0.986	935.689	9356.89	9.35689	46.7844	0.0467844
		0	-40.264	-402.64	-0.40264	-2.0132	-0.0020132	-0.20132			178	0.607	560.551	5605.51	5.60551	28.0275	0.0280275
		0	-40.264	-402.64	-0.40264	-2.0132	-0.0020132	-0.20132			179	0.879	829.779	8297.79	8.29779	41.4889	0.0414889
		0	-40.264	-402.64	-0.40264	-2.0132	-0.0020132	-0.20132			180	0.769	720.9	7209	7.209	36.045	0.036045
		0	-40.264	-402.64	-0.40264	-2.0132	-0.0020132	-0.20132			181	0.335	291.322	2913.22	2.91322	14.5661	0.0145661
		0	-40.264	-402.64	-0.40264	-2.0132	-0.0020132	-0.20132			182	0.701	653.593	6535.93	6.53593	32.6796	0.0326796
		0	-40.264	-402.64	-0.40264	-2.0132	-0.0020132	-0.20132			183	0.463	418.018	4180.18	4.18018	20.9009	0.0209009
		0	-40.264	-402.64	-0.40264	-2.0132	-0.0020132	-0.20132			184	0.704	656.562	6565.62	6.56562	32.8281	0.0328281
		0	-40.264	-402.64	-0.40264	-2.0132	-0.0020132	-0.20132			185	0.997	946.577	9465.77	9.46577	47.3288	0.0473288
		0	-40.264	-402.64	-0.40264	-2.0132	-0.0020132	-0.20132			186	0.741	693.185	6931.85	6.93185	34.6593	0.0346593
		0	-40.264	-402.64	-0.40264	-2.0132	-0.0020132	-0.20132			187	0.908	858.483	8584.83	8.58483	42.9242	0.0429242
		0	-40.264	-402.64	-0.40264	-2.0132	-0.0020132	-0.20132			188	0.881	831.759	8317.59	8.31759	41.5879	0.0415879
		0	-40.264	-402.64	-0.40264	-2.0132	-0.0020132	-0.20132			189	0.875	825.82	8258.2	8.2582	41.291	0.041291
		0	-40.264	-402.64	-0.40264	-2.0132	-0.0020132	-0.20132			190	0.664	616.97	6169.7	6.1697	30.8485	0.0308485
		0	-40.264	-402.64	-0.40264	-2.0132	-0.0020132	-0.20132			191	0.73	682.297	6822.97	6.82297	34.1149	0.0341149
		0	-40.264	-402.64	-0.40264	-2.0132	-0.0020132	-0.20132			192	0.795	746.635	7466.35	7.46635	37.3317	0.0373317
		0	-40.264	-402.64	-0.40264	-2.0132	-0.0020132	-0.20132
		0	-40.264	-402.64	-0.40264	-2.0132	-0.0020132	-0.20132
		0	-40.264	-402.64	-0.40264	-2.0132	-0.0020132	-0.20132
		0	-40.264	-402.64	-0.40264	-2.0132	-0.0020132	-0.20132
		0	-40.264	-402.64	-0.40264	-2.0132	-0.0020132	-0.20132
		0	-40.264	-402.64	-0.40264	-2.0132	-0.0020132	-0.20132
		0	-40.264	-402.64	-0.40264	-2.0132	-0.0020132	-0.20132
		0	-40.264	-402.64	-0.40264	-2.0132	-0.0020132	-0.20132
		0	-40.264	-402.64	-0.40264	-2.0132	-0.0020132	-0.20132
		0	-40.264	-402.64	-0.40264	-2.0132	-0.0020132	-0.20132
		0	-40.264	-402.64	-0.40264	-2.0132	-0.0020132	-0.20132
		0	-40.264	-402.64	-0.40264	-2.0132	-0.0020132	-0.20132
		0	-40.264	-402.64	-0.40264	-2.0132	-0.0020132	-0.20132
		0	-40.264	-402.64	-0.40264	-2.0132	-0.0020132	-0.20132
		0	-40.264	-402.64	-0.40264	-2.0132	-0.0020132	-0.20132
		0	-40.264	-402.64	-0.40264	-2.0132	-0.0020132	-0.20132
		0	-40.264	-402.64	-0.40264	-2.0132	-0.0020132	-0.20132
		0	-40.264	-402.64	-0.40264	-2.0132	-0.0020132	-0.20132
		0	-40.264	-402.64	-0.40264	-2.0132	-0.0020132	-0.20132
		0	-40.264	-402.64	-0.40264	-2.0132	-0.0020132	-0.20132
		0	-40.264	-402.64	-0.40264	-2.0132	-0.0020132	-0.20132
		0	-40.264	-402.64	-0.40264	-2.0132	-0.0020132	-0.20132
		0	-40.264	-402.64	-0.40264	-2.0132	-0.0020132	-0.20132
		0	-40.264	-402.64	-0.40264	-2.0132	-0.0020132	-0.20132
		0	-40.264	-402.64	-0.40264	-2.0132	-0.0020132	-0.20132
		0	-40.264	-402.64	-0.40264	-2.0132	-0.0020132	-0.20132
		0	-40.264	-402.64	-0.40264	-2.0132	-0.0020132	-0.20132
		0	-40.264	-402.64	-0.40264	-2.0132	-0.0020132	-0.20132
		0	-40.264	-402.64	-0.40264	-2.0132	-0.0020132	-0.20132
		0	-40.264	-402.64	-0.40264	-2.0132	-0.0020132	-0.20132
		0	-40.264	-402.64	-0.40264	-2.0132	-0.0020132	-0.20132
		0	-40.264	-402.64	-0.40264	-2.0132	-0.0020132	-0.20132
		0	-40.264	-402.64	-0.40264	-2.0132	-0.0020132	-0.20132
		0	-40.264	-402.64	-0.40264	-2.0132	-0.0020132	-0.20132
		0	-40.264	-402.64	-0.40264	-2.0132	-0.0020132	-0.20132
		0	-40.264	-402.64	-0.40264	-2.0132	-0.0020132	-0.20132
		0	-40.264	-402.64	-0.40264	-2.0132	-0.0020132	-0.20132
		0	-40.264	-402.64	-0.40264	-2.0132	-0.0020132	-0.20132
		0	-40.264	-402.64	-0.40264	-2.0132	-0.0020132	-0.20132
		0	-40.264	-402.64	-0.40264	-2.0132	-0.0020132	-0.20132
		0	-40.264	-402.64	-0.40264	-2.0132	-0.0020132	-0.20132
		0	-40.264	-402.64	-0.40264	-2.0132	-0.0020132	-0.20132
		0	-40.264	-402.64	-0.40264	-2.0132	-0.0020132	-0.20132
		0	-40.264	-402.64	-0.40264	-2.0132	-0.0020132	-0.20132
		0	-40.264	-402.64	-0.40264	-2.0132	-0.0020132	-0.20132
		0	-40.264	-402.64	-0.40264	-2.0132	-0.0020132	-0.20132
		0	-40.264	-402.64	-0.40264	-2.0132	-0.0020132	-0.20132
		0	-40.264	-402.64	-0.40264	-2.0132	-0.0020132	-0.20132
		0	-40.264	-402.64	-0.40264	-2.0132	-0.0020132	-0.20132
		0	-40.264	-402.64	-0.40264	-2.0132	-0.0020132	-0.20132
		0	-40.264	-402.64	-0.40264	-2.0132	-0.0020132	-0.20132
		0	-40.264	-402.64	-0.40264	-2.0132	-0.0020132	-0.20132
		0	-40.264	-402.64	-0.40264	-2.0132	-0.0020132	-0.20132
		0	-40.264	-402.64	-0.40264	-2.0132	-0.0020132	-0.20132
		0	-40.264	-402.64	-0.40264	-2.0132	-0.0020132	-0.20132
		0	-40.264	-402.64	-0.40264	-2.0132	-0.0020132	-0.20132
		0	-40.264	-402.64	-0.40264	-2.0132	-0.0020132	-0.20132
		0	-40.264	-402.64	-0.40264	-2.0132	-0.0020132	-0.20132
		0	-40.264	-402.64	-0.40264	-2.0132	-0.0020132	-0.20132
		0	-40.264	-402.64	-0.40264	-2.0132	-0.0020132	-0.20132
		0	-40.264	-402.64	-0.40264	-2.0132	-0.0020132	-0.20132
		0	-40.264	-402.64	-0.40264	-2.0132	-0.0020132	-0.20132
		0	-40.264	-402.64	-0.40264	-2.0132	-0.0020132	-0.20132
		0	-40.264	-402.64	-0.40264	-2.0132	-0.0020132	-0.20132

## Sheet: TSP2
	Soluble proteins
	Absorbance	Concentrations
		Conc.
	0	0
	0.244	200
	0.488	400
	0.667	600
	0.859	800
	1.074	1000
	1.196	1200
	soluble proteins
	Y	X
	Sample No.	soluble protiens	Concentration		mg/ml	ug/5ul	mg/5ul
control v1	1	0.932	882.239	8822.39	8.82239	44.1119	0.0441119	4.41119
	2	0.832	783.258	7832.58	7.83258	39.1629	0.0391629	3.91629
	3	0.945	895.106	8951.06	8.95106	44.7553	0.0447553	4.47553
0.1mM JA	4	0.781	732.778	7327.78	7.32778	36.6389	0.0366389	3.66389
	5	0.698	650.623	6506.23	6.50623	32.5312	0.0325312	3.25312
	6	0.754	706.053	7060.53	7.06053	35.3026	0.0353026	3.53026
1mM JA	7	0.766	717.93	7179.3	7.1793	35.8965	0.0358965	3.58965
	8	0.735	687.246	6872.46	6.87246	34.3623	0.0343623	3.43623
	9	0.756	708.032	7080.32	7.08032	35.4016	0.0354016	3.54016
Aphid	10	0.613	566.49	5664.9	5.6649	28.3245	0.0283245	2.83245
	11	0.417	372.487	3724.87	3.72487	18.6243	0.0186243	1.86243
	12	0.213	170.566	1705.66	1.70566	8.52828	0.00852828	0.852828
0.1mM+aphid	13	0.613	566.49	5664.9	5.6649	28.3245	0.0283245	2.83245
	14	0.587	540.754	5407.54	5.40754	27.0377	0.0270377	2.70377
	15	0.423	378.426	3784.26	3.78426	18.9213	0.0189213	1.89213
1mMJA+aphid	16	0.294	250.74	2507.4	2.5074	12.537	0.012537	1.2537
	17	0.241	198.28	1982.8	1.9828	9.91401	0.00991401	0.991401
	18	0.239	196.301	1963.01	1.96301	9.81503	0.00981503	0.981503
control v2	19	0.724	676.358	6763.58	6.76358	33.8179	0.0338179	3.38179
	20	0.794	745.645	7456.45	7.45645	37.2823	0.0372823	3.72823
	21	0.891	841.657	8416.57	8.41657	42.0828	0.0420828	4.20828
0.1mM JA	22	0.795	746.635	7466.35	7.46635	37.3317	0.0373317	3.73317
	23	0.856	807.013	8070.13	8.07013	40.3507	0.0403507	4.03507
	24	0.783	734.757	7347.57	7.34757	36.7379	0.0367379	3.67379
1mM JA	25	0.794	745.645	7456.45	7.45645	37.2823	0.0372823	3.72823
	26	0.799	750.594	7505.94	7.50594	37.5297	0.0375297	3.75297
	27	0.973	922.821	9228.21	9.22821	46.1411	0.0461411	4.61411
Aphid	28	0.345	301.22	3012.2	3.0122	15.061	0.015061	1.5061
	29	0.267	224.015	2240.15	2.24015	11.2008	0.0112008	1.12008
	30	0.212	169.576	1695.76	1.69576	8.47879	0.00847879	0.847879
0.1mM+aphid	31	0.589	542.734	5427.34	5.42734	27.1367	0.0271367	2.71367
	32	0.456	411.089	4110.89	4.11089	20.5545	0.0205545	2.05545
	33	0.345	301.22	3012.2	3.0122	15.061	0.015061	1.5061
1mMJA+aphid	34	0.412	367.538	3675.38	3.67538	18.3769	0.0183769	1.83769
	35	0.457	412.079	4120.79	4.12079	20.604	0.020604	2.0604
	36	0.444	399.212	3992.12	3.99212	19.9606	0.0199606	1.99606
		0.312	268.557	2685.57	2.68557	13.4278	0.0134278	1.34278
		0.344	300.231	3002.31	3.00231	15.0115	0.0150115	1.50115
		0.425	380.405	3804.05	3.80405	19.0203	0.0190203	1.90203
		0.294	250.74	2507.4	2.5074	12.537	0.012537	1.2537
		0.241	198.28	1982.8	1.9828	9.91401	0.00991401	0.991401
		0.239	196.301	1963.01	1.96301	9.81503	0.00981503	0.981503
		0.258	215.107	2151.07	2.15107	10.7553	0.0107553	1.07553
		0.301	257.669	2576.69	2.57669	12.8834	0.0128834	1.28834
		0.338	294.292	2942.92	2.94292	14.7146	0.0147146	1.47146
		0.379	334.874	3348.74	3.34874	16.7437	0.0167437	1.67437
		0.297	253.71	2537.1	2.5371	12.6855	0.0126855	1.26855
		0.466	420.987	4209.87	4.20987	21.0494	0.0210494	2.10494
		0.469	423.957	4239.57	4.23957	21.1978	0.0211978	2.11978
		0.477	431.875	4318.75	4.31875	21.5938	0.0215938	2.15938
		0.470667	425.607	4256.07	4.25607	21.2803	0.0212803	2.12803
		0.443	398.222	3982.22	3.98222	19.9111	0.0199111	1.99111
		0.481	435.835	4358.35	4.35835	21.7917	0.0217917	2.17917
		0.447	402.181	4021.81	4.02181	20.1091	0.0201091	2.01091
		0.457	412.079	4120.79	4.12079	20.604	0.020604	2.0604
		0.444	399.212	3992.12	3.99212	19.9606	0.0199606	1.99606
		0.441	396.242	3962.42	3.96242	19.8121	0.0198121	1.98121
		0.412	367.538	3675.38	3.67538	18.3769	0.0183769	1.83769
		0.432333	387.664	3876.64	3.87664	19.3832	0.0193832	1.93832
		0.457	412.079	4120.79	4.12079	20.604	0.020604	2.0604
		0.444	399.212	3992.12	3.99212	19.9606	0.0199606	1.99606
		0.448	403.171	4031.71	4.03171	20.1585	0.0201585	2.01585
		0.449667	404.821	4048.21	4.04821	20.241	0.020241	2.0241
		0.445	400.201	4002.01	4.00201	20.0101	0.0200101	2.00101
		0.451	406.14	4061.4	4.0614	20.307	0.020307	2.0307
		0.493	447.712	4477.12	4.47712	22.3856	0.0223856	2.23856
		0.463	418.018	4180.18	4.18018	20.9009	0.0209009	2.09009
		0.444	399.212	3992.12	3.99212	19.9606	0.0199606	1.99606
		0.413	368.528	3685.28	3.68528	18.4264	0.0184264	1.84264
		0.381	336.854	3368.54	3.36854	16.8427	0.0168427	1.68427
		0.412667	368.198	3681.98	3.68198	18.4099	0.0184099	1.84099
		0.384	339.823	3398.23	3.39823	16.9912	0.0169912	1.69912
		0.354	310.129	3101.29	3.10129	15.5064	0.0155064	1.55064
		0.455	410.1	4101	4.101	20.505	0.020505	2.0505
		0.397667	353.35	3533.5	3.5335	17.6675	0.0176675	1.76675
		0.462	417.028	4170.28	4.17028	20.8514	0.0208514	2.08514
		0.411	366.548	3665.48	3.66548	18.3274	0.0183274	1.83274
		0.372	327.945	3279.45	3.27945	16.3973	0.0163973	1.63973
		0.415	370.507	3705.07	3.70507	18.5254	0.0185254	1.85254
		0.37	325.966	3259.66	3.25966	16.2983	0.0162983	1.62983
		0.373	328.935	3289.35	3.28935	16.4468	0.0164468	1.64468
		0.331	287.363	2873.63	2.87363	14.3682	0.0143682	1.43682			83	1.102	1050.51	10505.1	10.5051	52.5253	0.0525253
		0.358	314.088	3140.88	3.14088	15.7044	0.0157044	1.57044			84	0.871	821.861	8218.61	8.21861	41.093	0.041093
		0.377	332.894	3328.94	3.32894	16.6447	0.0166447	1.66447			85	1.062	1010.91	10109.1	10.1091	50.5457	0.0505457
		0.369	324.976	3249.76	3.24976	16.2488	0.0162488	1.62488			86	1.056	1004.98	10049.8	10.0498	50.2488	0.0502488
		0.371	326.956	3269.56	3.26956	16.3478	0.0163478	1.63478			87	0.934	884.219	8842.19	8.84219	44.2109	0.0442109
		0.372333	328.275	3282.75	3.28275	16.4138	0.0164138	1.64138			88	0.9	850.565	8505.65	8.50565	42.5282	0.0425282
		0.376	331.905	3319.05	3.31905	16.5952	0.0165952	1.65952			89	1.169	1116.82	11168.2	11.1682	55.8412	0.0558412
		0.33	286.373	2863.73	2.86373	14.3187	0.0143187	1.43187			90	0.908	858.483	8584.83	8.58483	42.9242	0.0429242
		0.37	325.966	3259.66	3.25966	16.2983	0.0162983	1.62983			91	1.085	1033.68	10336.8	10.3368	51.684	0.051684
		0.358667	314.748	3147.48	3.14748	15.7374	0.0157374	1.57374			92	1.102	1050.51	10505.1	10.5051	52.5253	0.0525253
		0.366	322.006	3220.06	3.22006	16.1003	0.0161003	1.61003			93	0.642	595.194	5951.94	5.95194	29.7597	0.0297597
		0.377	332.894	3328.94	3.32894	16.6447	0.0166447	1.66447			94	0.942	892.137	8921.37	8.92137	44.6069	0.0446069
		0.364	320.027	3200.27	3.20027	16.0013	0.0160013	1.60013			95	1.048	997.057	9970.57	9.97057	49.8528	0.0498528
		0.369	324.976	3249.76	3.24976	16.2488	0.0162488	1.62488			96	0.824	775.339	7753.39	7.75339	38.767	0.038767
		0.359	315.078	3150.78	3.15078	15.7539	0.0157539	1.57539			97	1.103	1051.5	10515	10.515	52.5748	0.0525748
		0.332	288.353	2883.53	2.88353	14.4176	0.0144176	1.44176			98	0.93	880.259	8802.59	8.80259	44.013	0.044013
		0.364	320.027	3200.27	3.20027	16.0013	0.0160013	1.60013			99	0.999	948.556	9485.56	9.48556	47.4278	0.0474278
		0.351667	307.819	3078.19	3.07819	15.391	0.015391	1.5391			100	1.155	1102.97	11029.7	11.0297	55.1483	0.0551483
		0.361	317.057	3170.57	3.17057	15.8529	0.0158529	1.58529			101	0.412	367.538	3675.38	3.67538	18.3769	0.0183769
		0.35	306.169	3061.69	3.06169	15.3085	0.0153085	1.53085			102	0.357	313.098	3130.98	3.13098	15.6549	0.0156549
		0.358	314.088	3140.88	3.14088	15.7044	0.0157044	1.57044			103	0.516	470.478	4704.78	4.70478	23.5239	0.0235239
		0.356333	312.438	3124.38	3.12438	15.6219	0.0156219	1.56219			104	0.948	898.076	8980.76	8.98076	44.9038	0.0449038
		0.369	324.976	3249.76	3.24976	16.2488	0.0162488	1.62488			105	1.127	1075.25	10752.5	10.7525	53.7626	0.0537626
		0.371	326.956	3269.56	3.26956	16.3478	0.0163478	1.63478			106	0.914	864.422	8644.22	8.64422	43.2211	0.0432211
		0.366	322.006	3220.06	3.22006	16.1003	0.0161003	1.61003			107	1.15	1098.02	10980.2	10.9802	54.9009	0.0549009
		0.368667	324.646	3246.46	3.24646	16.2323	0.0162323	1.62323			108	1.015	964.393	9643.93	9.64393	48.2197	0.0482197
		0.361	317.057	3170.57	3.17057	15.8529	0.0158529	1.58529			109	0.417	372.487	3724.87	3.72487	18.6243	0.0186243
		0.369	324.976	3249.76	3.24976	16.2488	0.0162488	1.62488			110	0.894	844.626	8446.26	8.44626	42.2313	0.0422313
		0.342	298.251	2982.51	2.98251	14.9126	0.0149126	1.49126			111	0.411	366.548	3665.48	3.66548	18.3274	0.0183274
		0.357333	313.428	3134.28	3.13428	15.6714	0.0156714	1.56714			112	0.972	921.831	9218.31	9.21831	46.0916	0.0460916
		0.318	274.496	2744.96	2.74496	13.7248	0.0137248	1.37248			113	0.963	912.923	9129.23	9.12923	45.6462	0.0456462
		0.36	316.068	3160.68	3.16068	15.8034	0.0158034	1.58034			114	1.028	977.261	9772.61	9.77261	48.863	0.048863
		0.322	278.455	2784.55	2.78455	13.9227	0.0139227	1.39227			115	0.957	906.984	9069.84	9.06984	45.3492	0.0453492
		0.333333	289.673	2896.73	2.89673	14.4836	0.0144836	1.44836			116	1.085	1033.68	10336.8	10.3368	51.684	0.051684
		0.359	315.078	3150.78	3.15078	15.7539	0.0157539	1.57539			117	0.605	558.571	5585.71	5.58571	27.9286	0.0279286
		0.339	295.282	2952.82	2.95282	14.7641	0.0147641	1.47641			118	0.7	652.603	6526.03	6.52603	32.6302	0.0326302
		0.342	298.251	2982.51	2.98251	14.9126	0.0149126	1.49126			119	1.03	979.24	9792.4	9.7924	48.962	0.048962
		0.346667	302.87	3028.7	3.0287	15.1435	0.0151435	1.51435			120	0.509	463.549	4635.49	4.63549	23.1775	0.0231775
		0.363	319.037	3190.37	3.19037	15.9519	0.0159519	1.59519			121	0.796	747.625	7476.25	7.47625	37.3812	0.0373812
		0.347	303.2	3032	3.032	15.16	0.01516	1.516			122	1.135	1083.17	10831.7	10.8317	54.1585	0.0541585
		0.364	320.027	3200.27	3.20027	16.0013	0.0160013	1.60013			123	0.63	583.316	5833.16	5.83316	29.1658	0.0291658
		0.358	314.088	3140.88	3.14088	15.7044	0.0157044	1.57044			124	1.035	984.189	9841.89	9.84189	49.2095	0.0492095
		0.346	302.21	3022.1	3.0221	15.1105	0.0151105	1.51105			125	1.002	951.526	9515.26	9.51526	47.5763	0.0475763
		0.333	289.343	2893.43	2.89343	14.4671	0.0144671	1.44671			126	0.869	819.881	8198.81	8.19881	40.994	0.040994
		0.348	304.19	3041.9	3.0419	15.2095	0.0152095	1.52095			127	0.906	856.504	8565.04	8.56504	42.8252	0.0428252
		0.342333	298.581	2985.81	2.98581	14.929	0.014929	1.4929			128	0.357	313.098	3130.98	3.13098	15.6549	0.0156549
		0.48	434.845	4348.45	4.34845	21.7422	0.0217422	2.17422			129	1.042	991.118	9911.18	9.91118	49.5559	0.0495559
		0.489	443.753	4437.53	4.43753	22.1877	0.0221877	2.21877			130	0.713	665.471	6654.71	6.65471	33.2735	0.0332735
		0.4845	439.299	4392.99	4.39299	21.9649	0.0219649	2.19649			131	0.803	754.553	7545.53	7.54553	37.7277	0.0377277
		0.48675	441.526	4415.26	4.41526	22.0763	0.0220763	2.20763			132	0.618	571.439	5714.39	5.71439	28.5719	0.0285719
		0.486	440.784	4407.84	4.40784	22.0392	0.0220392	2.20392			133	0.858	808.993	8089.93	8.08993	40.4496	0.0404496
		0.418	373.477	3734.77	3.73477	18.6738	0.0186738	1.86738			134	0.117	75.5438	755.438	0.755438	3.77719	0.00377719
		0.452	407.13	4071.3	4.0713	20.3565	0.0203565	2.03565			135	0.697	649.634	6496.34	6.49634	32.4817	0.0324817
		0.435	390.303	3903.03	3.90303	19.5152	0.0195152	1.95152			136	0.223	180.464	1804.64	1.80464	9.02318	0.00902318
		0.478	432.865	4328.65	4.32865	21.6433	0.0216433	2.16433			137	0.739	691.206	6912.06	6.91206	34.5603	0.0345603
		0.481	435.835	4358.35	4.35835	21.7917	0.0217917	2.17917			138	1.142	1090.1	10901	10.901	54.505	0.054505
		0.4795	434.35	4343.5	4.3435	21.7175	0.0217175	2.17175			139	0.909	859.473	8594.73	8.59473	42.9737	0.0429737
		0.48025	435.092	4350.92	4.35092	21.7546	0.0217546	2.17546			140	1.162	1109.9	11099	11.099	55.4948	0.0554948
		0.484	438.804	4388.04	4.38804	21.9402	0.0219402	2.19402			141	0.781	732.778	7327.78	7.32778	36.6389	0.0366389
		0.461	416.038	4160.38	4.16038	20.8019	0.0208019	2.08019			142	0.747	699.124	6991.24	6.99124	34.9562	0.0349562
		0.4725	427.421	4274.21	4.27421	21.3711	0.0213711	2.13711			143	0.934	884.219	8842.19	8.84219	44.2109	0.0442109
		0.46675	421.73	4217.3	4.2173	21.0865	0.0210865	2.10865			144	0.721	673.389	6733.89	6.73389	33.6695	0.0336695
		0.411	366.548	3665.48	3.66548	18.3274	0.0183274	1.83274			145	1.093	1041.6	10416	10.416	52.0799	0.0520799
		0.456	411.089	4110.89	4.11089	20.5545	0.0205545	2.05545			146	0.977	926.78	9267.8	9.2678	46.339	0.046339
		0.4335	388.819	3888.19	3.88819	19.4409	0.0194409	1.94409			147	0.594	547.683	5476.83	5.47683	27.3842	0.0273842
		0.44475	399.954	3999.54	3.99954	19.9977	0.0199977	1.99977			148	1.028	977.261	9772.61	9.77261	48.863	0.048863
		0.479	433.855	4338.55	4.33855	21.6927	0.0216927	2.16927			149	0.517	471.468	4714.68	4.71468	23.5734	0.0235734
		0.382	337.843	3378.43	3.37843	16.8922	0.0168922	1.68922			150	0.903	853.534	8535.34	8.53534	42.6767	0.0426767
		0.4305	385.849	3858.49	3.85849	19.2925	0.0192925	1.92925			151	0.739	691.206	6912.06	6.91206	34.5603	0.0345603
		0.40625	361.846	3618.46	3.61846	18.0923	0.0180923	1.80923			152	0.345	301.22	3012.2	3.0122	15.061	0.015061
		0.381	336.854	3368.54	3.36854	16.8427	0.0168427	1.68427			153	0.638	591.235	5912.35	5.91235	29.5617	0.0295617
		0.438	393.273	3932.73	3.93273	19.6636	0.0196636	1.96636			154	0.532	486.315	4863.15	4.86315	24.3157	0.0243157
		0.4095	365.063	3650.63	3.65063	18.2532	0.0182532	1.82532			155	1.043	992.108	9921.08	9.92108	49.6054	0.0496054
		0.42375	379.168	3791.68	3.79168	18.9584	0.0189584	1.89584			156	1.026	975.281	9752.81	9.75281	48.7641	0.0487641
		0.422	377.436	3774.36	3.77436	18.8718	0.0188718	1.88718			157	0.731	683.287	6832.87	6.83287	34.1644	0.0341644
		0.381	336.854	3368.54	3.36854	16.8427	0.0168427	1.68427			158	1.048	997.057	9970.57	9.97057	49.8528	0.0498528
		0.4015	357.145	3571.45	3.57145	17.8572	0.0178572	1.78572			159	0.509	463.549	4635.49	4.63549	23.1775	0.0231775
		0.39125	346.999	3469.99	3.46999	17.35	0.01735	1.735			160	0.337	293.302	2933.02	2.93302	14.6651	0.0146651
		0.378	333.884	3338.84	3.33884	16.6942	0.0166942	1.66942			161	0.899	849.575	8495.75	8.49575	42.4788	0.0424788
		0.37	325.966	3259.66	3.25966	16.2983	0.0162983	1.62983			162	1.056	1004.98	10049.8	10.0498	50.2488	0.0502488
		0.374	329.925	3299.25	3.29925	16.4962	0.0164962	1.64962			163	1.137	1085.15	10851.5	10.8515	54.2575	0.0542575
		0.372	327.945	3279.45	3.27945	16.3973	0.0163973	1.63973			164	0.95	900.055	9000.56	9.00056	45.0028	0.0450028
		0.365	321.017	3210.17	3.21017	16.0508	0.0160508	1.60508			165	0.623	576.388	5763.88	5.76388	28.8194	0.0288194
		0.318	274.496	2744.96	2.74496	13.7248	0.0137248	1.37248			166	0.557	511.06	5110.6	5.1106	25.553	0.025553
		0.3415	297.756	2977.56	2.97756	14.8878	0.0148878	1.48878			167	0.876	826.81	8268.1	8.2681	41.3405	0.0413405
		0.32975	286.126	2861.26	2.86126	14.3063	0.0143063	1.43063			168	0.737	689.226	6892.26	6.89226	34.4613	0.0344613
		0.319	275.485	2754.85	2.75485	13.7743	0.0137743	1.37743			169	0.85	801.074	8010.74	8.01074	40.0537	0.0400537
		0.389	344.772	3447.72	3.44772	17.2386	0.0172386	1.72386			170	0.93	880.259	8802.59	8.80259	44.013	0.044013
		0.354	310.129	3101.29	3.10129	15.5064	0.0155064	1.55064			171	0.89	840.667	8406.67	8.40667	42.0333	0.0420333
		0.3715	327.45	3274.5	3.2745	16.3725	0.0163725	1.63725			172	0.864	814.932	8149.32	8.14932	40.7466	0.0407466
		0.384	339.823	3398.23	3.39823	16.9912	0.0169912	1.69912			173	0.511	465.529	4655.29	4.65529	23.2764	0.0232764
		0.387	342.792	3427.92	3.42792	17.1396	0.0171396	1.71396			174	0.861	811.962	8119.62	8.11962	40.5981	0.0405981
		0.3855	341.308	3413.08	3.41308	17.0654	0.0170654	1.70654			175	1.094	1042.59	10425.9	10.4259	52.1294	0.0521294
		0.38625	342.05	3420.5	3.4205	17.1025	0.0171025	1.71025			176	0.94	890.157	8901.57	8.90157	44.5079	0.0445079
		0.332	288.353	2883.53	2.88353	14.4176	0.0144176	1.44176			177	0.986	935.689	9356.89	9.35689	46.7844	0.0467844
		0.319	275.485	2754.85	2.75485	13.7743	0.0137743	1.37743			178	0.607	560.551	5605.51	5.60551	28.0275	0.0280275
		0.3255	281.919	2819.19	2.81919	14.096	0.014096	1.4096			179	0.879	829.779	8297.79	8.29779	41.4889	0.0414889
		0.32225	278.702	2787.02	2.78702	13.9351	0.0139351	1.39351			180	0.769	720.9	7209	7.209	36.045	0.036045
		0.321	277.465	2774.65	2.77465	13.8733	0.0138733	1.38733			181	0.335	291.322	2913.22	2.91322	14.5661	0.0145661
		0.3	256.679	2566.79	2.56679	12.834	0.012834	1.2834			182	0.701	653.593	6535.93	6.53593	32.6796	0.0326796
		0.3105	267.072	2670.72	2.67072	13.3536	0.0133536	1.33536			183	0.463	418.018	4180.18	4.18018	20.9009	0.0209009
		0.30525	261.876	2618.76	2.61876	13.0938	0.0130938	1.30938			184	0.704	656.562	6565.62	6.56562	32.8281	0.0328281
		0.314	270.536	2705.36	2.70536	13.5268	0.0135268	1.35268			185	0.997	946.577	9465.77	9.46577	47.3288	0.0473288
		0.379	334.874	3348.74	3.34874	16.7437	0.0167437	1.67437			186	0.741	693.185	6931.85	6.93185	34.6593	0.0346593
		0.3465	302.705	3027.05	3.02705	15.1353	0.0151353	1.51353			187	0.908	858.483	8584.83	8.58483	42.9242	0.0429242
		0.36275	318.79	3187.9	3.1879	15.9395	0.0159395	1.59395			188	0.881	831.759	8317.59	8.31759	41.5879	0.0415879
		0.388	343.782	3437.82	3.43782	17.1891	0.0171891	1.71891			189	0.875	825.82	8258.2	8.2582	41.291	0.041291
		0.317	273.506	2735.06	2.73506	13.6753	0.0136753	1.36753			190	0.664	616.97	6169.7	6.1697	30.8485	0.0308485
		0.3525	308.644	3086.44	3.08644	15.4322	0.0154322	1.54322			191	0.73	682.297	6822.97	6.82297	34.1149	0.0341149
		0.33475	291.075	2910.75	2.91075	14.5537	0.0145537	1.45537			192	0.795	746.635	7466.35	7.46635	37.3317	0.0373317
		0.403	358.629	3586.29	3.58629	17.9315	0.0179315	1.79315
		0.408	363.578	3635.78	3.63578	18.1789	0.0181789	1.81789
		0.4055	361.104	3611.04	3.61104	18.0552	0.0180552	1.80552
		0.40675	362.341	3623.41	3.62341	18.1171	0.0181171	1.81171
		0.496	450.682	4506.82	4.50682	22.5341	0.0225341	2.25341
		0.499	453.651	4536.51	4.53651	22.6826	0.0226826	2.26826
		0.4975	452.166	4521.66	4.52166	22.6083	0.0226083	2.26083
		0.49825	452.909	4529.09	4.52909	22.6454	0.0226454	2.26454
		0.468	422.967	4229.67	4.22967	21.1484	0.0211484	2.11484
		0.411	366.548	3665.48	3.66548	18.3274	0.0183274	1.83274
		0.4395	394.757	3947.57	3.94757	19.7379	0.0197379	1.97379
		0.42525	380.653	3806.53	3.80653	19.0326	0.0190326	1.90326
		0.472	426.926	4269.26	4.26926	21.3463	0.0213463	2.13463
		0.539	493.244	4932.44	4.93244	24.6622	0.0246622	2.46622
		0.5055	460.085	4600.85	4.60085	23.0042	0.0230042	2.30042
		0.52225	476.664	4766.64	4.76664	23.8332	0.0238332	2.38332
		0.391	346.752	3467.52	3.46752	17.3376	0.0173376	1.73376
		0.394	349.721	3497.21	3.49721	17.4861	0.0174861	1.74861
		0.3925	348.236	3482.36	3.48236	17.4118	0.0174118	1.74118
		0.39325	348.979	3489.79	3.48979	17.4489	0.0174489	1.74489
		0.446	401.191	4011.91	4.01191	20.0596	0.0200596	2.00596
		0.398	353.68	3536.8	3.5368	17.684	0.017684	1.7684
		0.422	377.436	3774.36	3.77436	18.8718	0.0188718	1.88718
		0.41	365.558	3655.58	3.65558	18.2779	0.0182779	1.82779
		0.456	411.089	4110.89	4.11089	20.5545	0.0205545	2.05545
		0.389	344.772	3447.72	3.44772	17.2386	0.0172386	1.72386
		0.4225	377.931	3779.31	3.77931	18.8965	0.0188965	1.88965
		0.40575	361.351	3613.51	3.61351	18.0676	0.0180676	1.80676
		0.391	346.752	3467.52	3.46752	17.3376	0.0173376	1.73376
		0.399	354.67	3546.7	3.5467	17.7335	0.0177335	1.77335
		0.395	350.711	3507.11	3.50711	17.5355	0.0175355	1.75355
		0.397	352.691	3526.91	3.52691	17.6345	0.0176345	1.76345
		0.401	356.65	3566.5	3.5665	17.8325	0.0178325	1.78325
		0.389	344.772	3447.72	3.44772	17.2386	0.0172386	1.72386
		0.395	350.711	3507.11	3.50711	17.5355	0.0175355	1.75355
		0.392	347.742	3477.42	3.47742	17.3871	0.0173871	1.73871
		0.397	352.691	3526.91	3.52691	17.6345	0.0176345	1.76345
		0.359	315.078	3150.78	3.15078	15.7539	0.0157539	1.57539
		0.378	333.884	3338.84	3.33884	16.6942	0.0166942	1.66942
		0.3685	324.481	3244.81	3.24481	16.224	0.016224	1.6224
		0.392	347.742	3477.42	3.47742	17.3871	0.0173871	1.73871
		0.371	326.956	3269.56	3.26956	16.3478	0.0163478	1.63478
		0.3815	337.349	3373.49	3.37349	16.8674	0.0168674	1.68674
		0.37625	332.152	3321.52	3.32152	16.6076	0.0166076	1.66076
		0.381	336.854	3368.54	3.36854	16.8427	0.0168427	1.68427
		0.389	344.772	3447.72	3.44772	17.2386	0.0172386	1.72386
		0.385	340.813	3408.13	3.40813	17.0406	0.0170406	1.70406
		0.387	342.792	3427.92	3.42792	17.1396	0.0171396	1.71396
		0.307	263.608	2636.08	2.63608	13.1804	0.0131804	1.31804
		0.311	267.567	2675.67	2.67567	13.3783	0.0133783	1.33783
		0.309	265.587	2655.87	2.65587	13.2794	0.0132794	1.32794
		0.31	266.577	2665.77	2.66577	13.3289	0.0133289	1.33289
		0.392	347.742	3477.42	3.47742	17.3871	0.0173871	1.73871
		0.313	269.547	2695.47	2.69547	13.4773	0.0134773	1.34773
		0.3525	308.644	3086.44	3.08644	15.4322	0.0154322	1.54322
		0.33275	289.095	2890.95	2.89095	14.4548	0.0144548	1.44548
		0.329	285.383	2853.83	2.85383	14.2692	0.0142692	1.42692
		0.319	275.485	2754.85	2.75485	13.7743	0.0137743	1.37743
		0.324	280.434	2804.34	2.80434	14.0217	0.0140217	1.40217
		0.3215	277.96	2779.6	2.7796	13.898	0.013898	1.3898
		0.301	257.669	2576.69	2.57669	12.8834	0.0128834	1.28834
		0.408	363.578	3635.78	3.63578	18.1789	0.0181789	1.81789
		0.3545	310.624	3106.24	3.10624	15.5312	0.0155312	1.55312
		0.38125	337.101	3371.01	3.37101	16.8551	0.0168551	1.68551

## Sheet: TSP3
	Soluble proteins
	Absorbance	Concentrations
		Conc.
	0	0
	0.244	200
	0.488	400
	0.667	600
	0.859	800
	1.074	1000
	1.196	1200
	soluble proteins
	Y	X
	Sample No.	soluble protiens	Concentration		mg/ml	ug/5ul	mg/5ul
control v1	1	0.88	830.769	8307.69	8.30769	41.5384	0.0415384	4.15384
	2	1.053	1002.01	10020.1	10.0201	50.1003	0.0501003	5.01003
	3	0.872	822.85	8228.5	8.2285	41.1425	0.0411425	4.11425
0.1mM JA	4	0.891	841.657	8416.57	8.41657	42.0828	0.0420828	4.20828
	5	0.647	600.143	6001.43	6.00143	30.0072	0.0300072	3.00072
	6	0.714	666.46	6664.6	6.6646	33.323	0.033323	3.3323
1mM JA	7	0.768	719.91	7199.1	7.1991	35.9955	0.0359955	3.59955
	8	0.864	814.932	8149.32	8.14932	40.7466	0.0407466	4.07466
	9	0.821	772.37	7723.7	7.7237	38.6185	0.0386185	3.86185
Aphid	10	0.303	259.648	2596.48	2.59648	12.9824	0.0129824	1.29824
	11	0.258	215.107	2151.07	2.15107	10.7553	0.0107553	1.07553
	12	0.218	175.515	1755.15	1.75515	8.77573	0.00877573	0.877573
0.1mM+aphid	13	0.497	451.672	4516.72	4.51672	22.5836	0.0225836	2.25836
	14	0.343	299.241	2992.41	2.99241	14.962	0.014962	1.4962
	15	0.392	347.742	3477.42	3.47742	17.3871	0.0173871	1.73871
1mMJA+aphid	16	0.609	562.53	5625.3	5.6253	28.1265	0.0281265	2.81265
	17	0.467	421.977	4219.77	4.21977	21.0989	0.0210989	2.10989
	18	0.212	169.576	1695.76	1.69576	8.47879	0.00847879	0.847879
control v2	19	0.992	941.628	9416.28	9.41628	47.0814	0.0470814	4.70814
	20	0.838	789.197	7891.97	7.89197	39.4598	0.0394598	3.94598
	21	1.197	1144.54	11445.4	11.4454	57.2269	0.0572269	5.72269
0.1mM JA	22	0.567	520.958	5209.58	5.20958	26.0479	0.0260479	2.60479
	23	0.802	753.564	7535.64	7.53564	37.6782	0.0376782	3.76782
	24	0.707	659.532	6595.32	6.59532	32.9766	0.0329766	3.29766
1mM JA	25	0.815	766.431	7664.31	7.66431	38.3216	0.0383216	3.83216
	26	1.031	980.23	9802.3	9.8023	49.0115	0.0490115	4.90115
	27	0.688	640.725	6407.25	6.40725	32.0363	0.0320363	3.20363
Aphid	28	0.214	171.555	1715.55	1.71555	8.57777	0.00857777	0.857777
	29	0.239	196.301	1963.01	1.96301	9.81503	0.00981503	0.981503
	30	0.258	215.107	2151.07	2.15107	10.7553	0.0107553	1.07553
0.1mM+aphid	31	0.301	257.669	2576.69	2.57669	12.8834	0.0128834	1.28834
	32	0.456	411.089	4110.89	4.11089	20.5545	0.0205545	2.05545
	33	0.379	334.874	3348.74	3.34874	16.7437	0.0167437	1.67437
1mMJA+aphid	34	0.297	253.71	2537.1	2.5371	12.6855	0.0126855	1.26855
	35	0.282	238.862	2388.62	2.38862	11.9431	0.0119431	1.19431
	36	0.469	423.957	4239.57	4.23957	21.1978	0.0211978	2.11978
		0.312	268.557	2685.57	2.68557	13.4278	0.0134278	1.34278
		0.344	300.231	3002.31	3.00231	15.0115	0.0150115	1.50115
		0.425	380.405	3804.05	3.80405	19.0203	0.0190203	1.90203
		0.294	250.74	2507.4	2.5074	12.537	0.012537	1.2537
		0.241	198.28	1982.8	1.9828	9.91401	0.00991401	0.991401
		0.239	196.301	1963.01	1.96301	9.81503	0.00981503	0.981503
		0.258	215.107	2151.07	2.15107	10.7553	0.0107553	1.07553
		0.301	257.669	2576.69	2.57669	12.8834	0.0128834	1.28834
		0.338	294.292	2942.92	2.94292	14.7146	0.0147146	1.47146
		0.379	334.874	3348.74	3.34874	16.7437	0.0167437	1.67437
		0.297	253.71	2537.1	2.5371	12.6855	0.0126855	1.26855
		0.466	420.987	4209.87	4.20987	21.0494	0.0210494	2.10494
		0.469	423.957	4239.57	4.23957	21.1978	0.0211978	2.11978
		0.477	431.875	4318.75	4.31875	21.5938	0.0215938	2.15938
		0.470667	425.607	4256.07	4.25607	21.2803	0.0212803	2.12803
		0.443	398.222	3982.22	3.98222	19.9111	0.0199111	1.99111
		0.481	435.835	4358.35	4.35835	21.7917	0.0217917	2.17917
		0.447	402.181	4021.81	4.02181	20.1091	0.0201091	2.01091
		0.457	412.079	4120.79	4.12079	20.604	0.020604	2.0604
		0.444	399.212	3992.12	3.99212	19.9606	0.0199606	1.99606
		0.441	396.242	3962.42	3.96242	19.8121	0.0198121	1.98121
		0.412	367.538	3675.38	3.67538	18.3769	0.0183769	1.83769
		0.432333	387.664	3876.64	3.87664	19.3832	0.0193832	1.93832
		0.457	412.079	4120.79	4.12079	20.604	0.020604	2.0604
		0.444	399.212	3992.12	3.99212	19.9606	0.0199606	1.99606
		0.448	403.171	4031.71	4.03171	20.1585	0.0201585	2.01585
		0.449667	404.821	4048.21	4.04821	20.241	0.020241	2.0241
		0.445	400.201	4002.01	4.00201	20.0101	0.0200101	2.00101
		0.451	406.14	4061.4	4.0614	20.307	0.020307	2.0307
		0.493	447.712	4477.12	4.47712	22.3856	0.0223856	2.23856
		0.463	418.018	4180.18	4.18018	20.9009	0.0209009	2.09009
		0.444	399.212	3992.12	3.99212	19.9606	0.0199606	1.99606
		0.413	368.528	3685.28	3.68528	18.4264	0.0184264	1.84264
		0.381	336.854	3368.54	3.36854	16.8427	0.0168427	1.68427
		0.412667	368.198	3681.98	3.68198	18.4099	0.0184099	1.84099
		0.384	339.823	3398.23	3.39823	16.9912	0.0169912	1.69912
		0.354	310.129	3101.29	3.10129	15.5064	0.0155064	1.55064
		0.455	410.1	4101	4.101	20.505	0.020505	2.0505
		0.397667	353.35	3533.5	3.5335	17.6675	0.0176675	1.76675
		0.462	417.028	4170.28	4.17028	20.8514	0.0208514	2.08514
		0.411	366.548	3665.48	3.66548	18.3274	0.0183274	1.83274
		0.372	327.945	3279.45	3.27945	16.3973	0.0163973	1.63973
		0.415	370.507	3705.07	3.70507	18.5254	0.0185254	1.85254
		0.37	325.966	3259.66	3.25966	16.2983	0.0162983	1.62983
		0.373	328.935	3289.35	3.28935	16.4468	0.0164468	1.64468
		0.331	287.363	2873.63	2.87363	14.3682	0.0143682	1.43682			83	1.102	1050.51	10505.1	10.5051	52.5253	0.0525253
		0.358	314.088	3140.88	3.14088	15.7044	0.0157044	1.57044			84	0.871	821.861	8218.61	8.21861	41.093	0.041093
		0.377	332.894	3328.94	3.32894	16.6447	0.0166447	1.66447			85	1.062	1010.91	10109.1	10.1091	50.5457	0.0505457
		0.369	324.976	3249.76	3.24976	16.2488	0.0162488	1.62488			86	1.056	1004.98	10049.8	10.0498	50.2488	0.0502488
		0.371	326.956	3269.56	3.26956	16.3478	0.0163478	1.63478			87	0.934	884.219	8842.19	8.84219	44.2109	0.0442109
		0.372333	328.275	3282.75	3.28275	16.4138	0.0164138	1.64138			88	0.9	850.565	8505.65	8.50565	42.5282	0.0425282
		0.376	331.905	3319.05	3.31905	16.5952	0.0165952	1.65952			89	1.169	1116.82	11168.2	11.1682	55.8412	0.0558412
		0.33	286.373	2863.73	2.86373	14.3187	0.0143187	1.43187			90	0.908	858.483	8584.83	8.58483	42.9242	0.0429242
		0.37	325.966	3259.66	3.25966	16.2983	0.0162983	1.62983			91	1.085	1033.68	10336.8	10.3368	51.684	0.051684
		0.358667	314.748	3147.48	3.14748	15.7374	0.0157374	1.57374			92	1.102	1050.51	10505.1	10.5051	52.5253	0.0525253
		0.366	322.006	3220.06	3.22006	16.1003	0.0161003	1.61003			93	0.642	595.194	5951.94	5.95194	29.7597	0.0297597
		0.377	332.894	3328.94	3.32894	16.6447	0.0166447	1.66447			94	0.942	892.137	8921.37	8.92137	44.6069	0.0446069
		0.364	320.027	3200.27	3.20027	16.0013	0.0160013	1.60013			95	1.048	997.057	9970.57	9.97057	49.8528	0.0498528
		0.369	324.976	3249.76	3.24976	16.2488	0.0162488	1.62488			96	0.824	775.339	7753.39	7.75339	38.767	0.038767
		0.359	315.078	3150.78	3.15078	15.7539	0.0157539	1.57539			97	1.103	1051.5	10515	10.515	52.5748	0.0525748
		0.332	288.353	2883.53	2.88353	14.4176	0.0144176	1.44176			98	0.93	880.259	8802.59	8.80259	44.013	0.044013
		0.364	320.027	3200.27	3.20027	16.0013	0.0160013	1.60013			99	0.999	948.556	9485.56	9.48556	47.4278	0.0474278
		0.351667	307.819	3078.19	3.07819	15.391	0.015391	1.5391			100	1.155	1102.97	11029.7	11.0297	55.1483	0.0551483
		0.361	317.057	3170.57	3.17057	15.8529	0.0158529	1.58529			101	0.412	367.538	3675.38	3.67538	18.3769	0.0183769
		0.35	306.169	3061.69	3.06169	15.3085	0.0153085	1.53085			102	0.357	313.098	3130.98	3.13098	15.6549	0.0156549
		0.358	314.088	3140.88	3.14088	15.7044	0.0157044	1.57044			103	0.516	470.478	4704.78	4.70478	23.5239	0.0235239
		0.356333	312.438	3124.38	3.12438	15.6219	0.0156219	1.56219			104	0.948	898.076	8980.76	8.98076	44.9038	0.0449038
		0.369	324.976	3249.76	3.24976	16.2488	0.0162488	1.62488			105	1.127	1075.25	10752.5	10.7525	53.7626	0.0537626
		0.371	326.956	3269.56	3.26956	16.3478	0.0163478	1.63478			106	0.914	864.422	8644.22	8.64422	43.2211	0.0432211
		0.366	322.006	3220.06	3.22006	16.1003	0.0161003	1.61003			107	1.15	1098.02	10980.2	10.9802	54.9009	0.0549009
		0.368667	324.646	3246.46	3.24646	16.2323	0.0162323	1.62323			108	1.015	964.393	9643.93	9.64393	48.2197	0.0482197
		0.361	317.057	3170.57	3.17057	15.8529	0.0158529	1.58529			109	0.417	372.487	3724.87	3.72487	18.6243	0.0186243
		0.369	324.976	3249.76	3.24976	16.2488	0.0162488	1.62488			110	0.894	844.626	8446.26	8.44626	42.2313	0.0422313
		0.342	298.251	2982.51	2.98251	14.9126	0.0149126	1.49126			111	0.411	366.548	3665.48	3.66548	18.3274	0.0183274
		0.357333	313.428	3134.28	3.13428	15.6714	0.0156714	1.56714			112	0.972	921.831	9218.31	9.21831	46.0916	0.0460916
		0.318	274.496	2744.96	2.74496	13.7248	0.0137248	1.37248			113	0.963	912.923	9129.23	9.12923	45.6462	0.0456462
		0.36	316.068	3160.68	3.16068	15.8034	0.0158034	1.58034			114	1.028	977.261	9772.61	9.77261	48.863	0.048863
		0.322	278.455	2784.55	2.78455	13.9227	0.0139227	1.39227			115	0.957	906.984	9069.84	9.06984	45.3492	0.0453492
		0.333333	289.673	2896.73	2.89673	14.4836	0.0144836	1.44836			116	1.085	1033.68	10336.8	10.3368	51.684	0.051684
		0.359	315.078	3150.78	3.15078	15.7539	0.0157539	1.57539			117	0.605	558.571	5585.71	5.58571	27.9286	0.0279286
		0.339	295.282	2952.82	2.95282	14.7641	0.0147641	1.47641			118	0.7	652.603	6526.03	6.52603	32.6302	0.0326302
		0.342	298.251	2982.51	2.98251	14.9126	0.0149126	1.49126			119	1.03	979.24	9792.4	9.7924	48.962	0.048962
		0.346667	302.87	3028.7	3.0287	15.1435	0.0151435	1.51435			120	0.509	463.549	4635.49	4.63549	23.1775	0.0231775
		0.363	319.037	3190.37	3.19037	15.9519	0.0159519	1.59519			121	0.796	747.625	7476.25	7.47625	37.3812	0.0373812
		0.347	303.2	3032	3.032	15.16	0.01516	1.516			122	1.135	1083.17	10831.7	10.8317	54.1585	0.0541585
		0.364	320.027	3200.27	3.20027	16.0013	0.0160013	1.60013			123	0.63	583.316	5833.16	5.83316	29.1658	0.0291658
		0.358	314.088	3140.88	3.14088	15.7044	0.0157044	1.57044			124	1.035	984.189	9841.89	9.84189	49.2095	0.0492095
		0.346	302.21	3022.1	3.0221	15.1105	0.0151105	1.51105			125	1.002	951.526	9515.26	9.51526	47.5763	0.0475763
		0.333	289.343	2893.43	2.89343	14.4671	0.0144671	1.44671			126	0.869	819.881	8198.81	8.19881	40.994	0.040994
		0.348	304.19	3041.9	3.0419	15.2095	0.0152095	1.52095			127	0.906	856.504	8565.04	8.56504	42.8252	0.0428252
		0.342333	298.581	2985.81	2.98581	14.929	0.014929	1.4929			128	0.357	313.098	3130.98	3.13098	15.6549	0.0156549
		0.48	434.845	4348.45	4.34845	21.7422	0.0217422	2.17422			129	1.042	991.118	9911.18	9.91118	49.5559	0.0495559
		0.489	443.753	4437.53	4.43753	22.1877	0.0221877	2.21877			130	0.713	665.471	6654.71	6.65471	33.2735	0.0332735
		0.4845	439.299	4392.99	4.39299	21.9649	0.0219649	2.19649			131	0.803	754.553	7545.53	7.54553	37.7277	0.0377277
		0.48675	441.526	4415.26	4.41526	22.0763	0.0220763	2.20763			132	0.618	571.439	5714.39	5.71439	28.5719	0.0285719
		0.486	440.784	4407.84	4.40784	22.0392	0.0220392	2.20392			133	0.858	808.993	8089.93	8.08993	40.4496	0.0404496
		0.418	373.477	3734.77	3.73477	18.6738	0.0186738	1.86738			134	0.117	75.5438	755.438	0.755438	3.77719	0.00377719
		0.452	407.13	4071.3	4.0713	20.3565	0.0203565	2.03565			135	0.697	649.634	6496.34	6.49634	32.4817	0.0324817
		0.435	390.303	3903.03	3.90303	19.5152	0.0195152	1.95152			136	0.223	180.464	1804.64	1.80464	9.02318	0.00902318
		0.478	432.865	4328.65	4.32865	21.6433	0.0216433	2.16433			137	0.739	691.206	6912.06	6.91206	34.5603	0.0345603
		0.481	435.835	4358.35	4.35835	21.7917	0.0217917	2.17917			138	1.142	1090.1	10901	10.901	54.505	0.054505
		0.4795	434.35	4343.5	4.3435	21.7175	0.0217175	2.17175			139	0.909	859.473	8594.73	8.59473	42.9737	0.0429737
		0.48025	435.092	4350.92	4.35092	21.7546	0.0217546	2.17546			140	1.162	1109.9	11099	11.099	55.4948	0.0554948
		0.484	438.804	4388.04	4.38804	21.9402	0.0219402	2.19402			141	0.781	732.778	7327.78	7.32778	36.6389	0.0366389
		0.461	416.038	4160.38	4.16038	20.8019	0.0208019	2.08019			142	0.747	699.124	6991.24	6.99124	34.9562	0.0349562
		0.4725	427.421	4274.21	4.27421	21.3711	0.0213711	2.13711			143	0.934	884.219	8842.19	8.84219	44.2109	0.0442109
		0.46675	421.73	4217.3	4.2173	21.0865	0.0210865	2.10865			144	0.721	673.389	6733.89	6.73389	33.6695	0.0336695
		0.411	366.548	3665.48	3.66548	18.3274	0.0183274	1.83274			145	1.093	1041.6	10416	10.416	52.0799	0.0520799
		0.456	411.089	4110.89	4.11089	20.5545	0.0205545	2.05545			146	0.977	926.78	9267.8	9.2678	46.339	0.046339
		0.4335	388.819	3888.19	3.88819	19.4409	0.0194409	1.94409			147	0.594	547.683	5476.83	5.47683	27.3842	0.0273842
		0.44475	399.954	3999.54	3.99954	19.9977	0.0199977	1.99977			148	1.028	977.261	9772.61	9.77261	48.863	0.048863
		0.479	433.855	4338.55	4.33855	21.6927	0.0216927	2.16927			149	0.517	471.468	4714.68	4.71468	23.5734	0.0235734
		0.382	337.843	3378.43	3.37843	16.8922	0.0168922	1.68922			150	0.903	853.534	8535.34	8.53534	42.6767	0.0426767
		0.4305	385.849	3858.49	3.85849	19.2925	0.0192925	1.92925			151	0.739	691.206	6912.06	6.91206	34.5603	0.0345603
		0.40625	361.846	3618.46	3.61846	18.0923	0.0180923	1.80923			152	0.345	301.22	3012.2	3.0122	15.061	0.015061
		0.381	336.854	3368.54	3.36854	16.8427	0.0168427	1.68427			153	0.638	591.235	5912.35	5.91235	29.5617	0.0295617
		0.438	393.273	3932.73	3.93273	19.6636	0.0196636	1.96636			154	0.532	486.315	4863.15	4.86315	24.3157	0.0243157
		0.4095	365.063	3650.63	3.65063	18.2532	0.0182532	1.82532			155	1.043	992.108	9921.08	9.92108	49.6054	0.0496054
		0.42375	379.168	3791.68	3.79168	18.9584	0.0189584	1.89584			156	1.026	975.281	9752.81	9.75281	48.7641	0.0487641
		0.422	377.436	3774.36	3.77436	18.8718	0.0188718	1.88718			157	0.731	683.287	6832.87	6.83287	34.1644	0.0341644
		0.381	336.854	3368.54	3.36854	16.8427	0.0168427	1.68427			158	1.048	997.057	9970.57	9.97057	49.8528	0.0498528
		0.4015	357.145	3571.45	3.57145	17.8572	0.0178572	1.78572			159	0.509	463.549	4635.49	4.63549	23.1775	0.0231775
		0.39125	346.999	3469.99	3.46999	17.35	0.01735	1.735			160	0.337	293.302	2933.02	2.93302	14.6651	0.0146651
		0.378	333.884	3338.84	3.33884	16.6942	0.0166942	1.66942			161	0.899	849.575	8495.75	8.49575	42.4788	0.0424788
		0.37	325.966	3259.66	3.25966	16.2983	0.0162983	1.62983			162	1.056	1004.98	10049.8	10.0498	50.2488	0.0502488
		0.374	329.925	3299.25	3.29925	16.4962	0.0164962	1.64962			163	1.137	1085.15	10851.5	10.8515	54.2575	0.0542575
		0.372	327.945	3279.45	3.27945	16.3973	0.0163973	1.63973			164	0.95	900.055	9000.56	9.00056	45.0028	0.0450028
		0.365	321.017	3210.17	3.21017	16.0508	0.0160508	1.60508			165	0.623	576.388	5763.88	5.76388	28.8194	0.0288194
		0.318	274.496	2744.96	2.74496	13.7248	0.0137248	1.37248			166	0.557	511.06	5110.6	5.1106	25.553	0.025553
		0.3415	297.756	2977.56	2.97756	14.8878	0.0148878	1.48878			167	0.876	826.81	8268.1	8.2681	41.3405	0.0413405
		0.32975	286.126	2861.26	2.86126	14.3063	0.0143063	1.43063			168	0.737	689.226	6892.26	6.89226	34.4613	0.0344613
		0.319	275.485	2754.85	2.75485	13.7743	0.0137743	1.37743			169	0.85	801.074	8010.74	8.01074	40.0537	0.0400537
		0.389	344.772	3447.72	3.44772	17.2386	0.0172386	1.72386			170	0.93	880.259	8802.59	8.80259	44.013	0.044013
		0.354	310.129	3101.29	3.10129	15.5064	0.0155064	1.55064			171	0.89	840.667	8406.67	8.40667	42.0333	0.0420333
		0.3715	327.45	3274.5	3.2745	16.3725	0.0163725	1.63725			172	0.864	814.932	8149.32	8.14932	40.7466	0.0407466
		0.384	339.823	3398.23	3.39823	16.9912	0.0169912	1.69912			173	0.511	465.529	4655.29	4.65529	23.2764	0.0232764
		0.387	342.792	3427.92	3.42792	17.1396	0.0171396	1.71396			174	0.861	811.962	8119.62	8.11962	40.5981	0.0405981
		0.3855	341.308	3413.08	3.41308	17.0654	0.0170654	1.70654			175	1.094	1042.59	10425.9	10.4259	52.1294	0.0521294
		0.38625	342.05	3420.5	3.4205	17.1025	0.0171025	1.71025			176	0.94	890.157	8901.57	8.90157	44.5079	0.0445079
		0.332	288.353	2883.53	2.88353	14.4176	0.0144176	1.44176			177	0.986	935.689	9356.89	9.35689	46.7844	0.0467844
		0.319	275.485	2754.85	2.75485	13.7743	0.0137743	1.37743			178	0.607	560.551	5605.51	5.60551	28.0275	0.0280275
		0.3255	281.919	2819.19	2.81919	14.096	0.014096	1.4096			179	0.879	829.779	8297.79	8.29779	41.4889	0.0414889
		0.32225	278.702	2787.02	2.78702	13.9351	0.0139351	1.39351			180	0.769	720.9	7209	7.209	36.045	0.036045
		0.321	277.465	2774.65	2.77465	13.8733	0.0138733	1.38733			181	0.335	291.322	2913.22	2.91322	14.5661	0.0145661
		0.3	256.679	2566.79	2.56679	12.834	0.012834	1.2834			182	0.701	653.593	6535.93	6.53593	32.6796	0.0326796
		0.3105	267.072	2670.72	2.67072	13.3536	0.0133536	1.33536			183	0.463	418.018	4180.18	4.18018	20.9009	0.0209009
		0.30525	261.876	2618.76	2.61876	13.0938	0.0130938	1.30938			184	0.704	656.562	6565.62	6.56562	32.8281	0.0328281
		0.314	270.536	2705.36	2.70536	13.5268	0.0135268	1.35268			185	0.997	946.577	9465.77	9.46577	47.3288	0.0473288
		0.379	334.874	3348.74	3.34874	16.7437	0.0167437	1.67437			186	0.741	693.185	6931.85	6.93185	34.6593	0.0346593
		0.3465	302.705	3027.05	3.02705	15.1353	0.0151353	1.51353			187	0.908	858.483	8584.83	8.58483	42.9242	0.0429242
		0.36275	318.79	3187.9	3.1879	15.9395	0.0159395	1.59395			188	0.881	831.759	8317.59	8.31759	41.5879	0.0415879
		0.388	343.782	3437.82	3.43782	17.1891	0.0171891	1.71891			189	0.875	825.82	8258.2	8.2582	41.291	0.041291
		0.317	273.506	2735.06	2.73506	13.6753	0.0136753	1.36753			190	0.664	616.97	6169.7	6.1697	30.8485	0.0308485
		0.3525	308.644	3086.44	3.08644	15.4322	0.0154322	1.54322			191	0.73	682.297	6822.97	6.82297	34.1149	0.0341149
		0.33475	291.075	2910.75	2.91075	14.5537	0.0145537	1.45537			192	0.795	746.635	7466.35	7.46635	37.3317	0.0373317
		0.403	358.629	3586.29	3.58629	17.9315	0.0179315	1.79315
		0.408	363.578	3635.78	3.63578	18.1789	0.0181789	1.81789
		0.4055	361.104	3611.04	3.61104	18.0552	0.0180552	1.80552
		0.40675	362.341	3623.41	3.62341	18.1171	0.0181171	1.81171
		0.496	450.682	4506.82	4.50682	22.5341	0.0225341	2.25341
		0.499	453.651	4536.51	4.53651	22.6826	0.0226826	2.26826
		0.4975	452.166	4521.66	4.52166	22.6083	0.0226083	2.26083
		0.49825	452.909	4529.09	4.52909	22.6454	0.0226454	2.26454
		0.468	422.967	4229.67	4.22967	21.1484	0.0211484	2.11484
		0.411	366.548	3665.48	3.66548	18.3274	0.0183274	1.83274
		0.4395	394.757	3947.57	3.94757	19.7379	0.0197379	1.97379
		0.42525	380.653	3806.53	3.80653	19.0326	0.0190326	1.90326
		0.472	426.926	4269.26	4.26926	21.3463	0.0213463	2.13463
		0.539	493.244	4932.44	4.93244	24.6622	0.0246622	2.46622
		0.5055	460.085	4600.85	4.60085	23.0042	0.0230042	2.30042
		0.52225	476.664	4766.64	4.76664	23.8332	0.0238332	2.38332
		0.391	346.752	3467.52	3.46752	17.3376	0.0173376	1.73376
		0.394	349.721	3497.21	3.49721	17.4861	0.0174861	1.74861
		0.3925	348.236	3482.36	3.48236	17.4118	0.0174118	1.74118
		0.39325	348.979	3489.79	3.48979	17.4489	0.0174489	1.74489
		0.446	401.191	4011.91	4.01191	20.0596	0.0200596	2.00596
		0.398	353.68	3536.8	3.5368	17.684	0.017684	1.7684
		0.422	377.436	3774.36	3.77436	18.8718	0.0188718	1.88718
		0.41	365.558	3655.58	3.65558	18.2779	0.0182779	1.82779
		0.456	411.089	4110.89	4.11089	20.5545	0.0205545	2.05545
		0.389	344.772	3447.72	3.44772	17.2386	0.0172386	1.72386
		0.4225	377.931	3779.31	3.77931	18.8965	0.0188965	1.88965
		0.40575	361.351	3613.51	3.61351	18.0676	0.0180676	1.80676
		0.391	346.752	3467.52	3.46752	17.3376	0.0173376	1.73376
		0.399	354.67	3546.7	3.5467	17.7335	0.0177335	1.77335
		0.395	350.711	3507.11	3.50711	17.5355	0.0175355	1.75355
		0.397	352.691	3526.91	3.52691	17.6345	0.0176345	1.76345
		0.401	356.65	3566.5	3.5665	17.8325	0.0178325	1.78325
		0.389	344.772	3447.72	3.44772	17.2386	0.0172386	1.72386
		0.395	350.711	3507.11	3.50711	17.5355	0.0175355	1.75355
		0.392	347.742	3477.42	3.47742	17.3871	0.0173871	1.73871
		0.397	352.691	3526.91	3.52691	17.6345	0.0176345	1.76345
		0.359	315.078	3150.78	3.15078	15.7539	0.0157539	1.57539
		0.378	333.884	3338.84	3.33884	16.6942	0.0166942	1.66942
		0.3685	324.481	3244.81	3.24481	16.224	0.016224	1.6224
		0.392	347.742	3477.42	3.47742	17.3871	0.0173871	1.73871
		0.371	326.956	3269.56	3.26956	16.3478	0.0163478	1.63478
		0.3815	337.349	3373.49	3.37349	16.8674	0.0168674	1.68674
		0.37625	332.152	3321.52	3.32152	16.6076	0.0166076	1.66076
		0.381	336.854	3368.54	3.36854	16.8427	0.0168427	1.68427
		0.389	344.772	3447.72	3.44772	17.2386	0.0172386	1.72386
		0.385	340.813	3408.13	3.40813	17.0406	0.0170406	1.70406
		0.387	342.792	3427.92	3.42792	17.1396	0.0171396	1.71396
		0.307	263.608	2636.08	2.63608	13.1804	0.0131804	1.31804
		0.311	267.567	2675.67	2.67567	13.3783	0.0133783	1.33783
		0.309	265.587	2655.87	2.65587	13.2794	0.0132794	1.32794
		0.31	266.577	2665.77	2.66577	13.3289	0.0133289	1.33289
		0.392	347.742	3477.42	3.47742	17.3871	0.0173871	1.73871
		0.313	269.547	2695.47	2.69547	13.4773	0.0134773	1.34773
		0.3525	308.644	3086.44	3.08644	15.4322	0.0154322	1.54322
		0.33275	289.095	2890.95	2.89095	14.4548	0.0144548	1.44548
		0.329	285.383	2853.83	2.85383	14.2692	0.0142692	1.42692
		0.319	275.485	2754.85	2.75485	13.7743	0.0137743	1.37743
		0.324	280.434	2804.34	2.80434	14.0217	0.0140217	1.40217
		0.3215	277.96	2779.6	2.7796	13.898	0.013898	1.3898
		0.301	257.669	2576.69	2.57669	12.8834	0.0128834	1.28834
		0.408	363.578	3635.78	3.63578	18.1789	0.0181789	1.81789
		0.3545	310.624	3106.24	3.10624	15.5312	0.0155312	1.55312
		0.38125	337.101	3371.01	3.37101	16.8551	0.0168551	1.68551

## Sheet: TSO4
	Soluble proteins
	Absorbance	Concentrations
		Conc.
	0	0
	0.244	200
	0.488	400
	0.667	600
	0.859	800
	1.074	1000
	1.196	1200
	soluble proteins
	Y	X
	Sample No.	soluble protiens	Concentration		mg/ml	ug/5ul	mg/5ul
control v1	1	0.998	947.566	9475.66	9.47566	47.3783	0.0473783	4.73783
	2	1.015	964.393	9643.93	9.64393	48.2197	0.0482197	4.82197
	3	1.123	1071.29	10712.9	10.7129	53.5646	0.0535646	5.35646
0.1mM JA	4	0.866	816.911	8169.11	8.16911	40.8456	0.0408456	4.08456
	5	0.865	815.922	8159.22	8.15922	40.7961	0.0407961	4.07961
	6	0.872	822.85	8228.5	8.2285	41.1425	0.0411425	4.11425
1mM JA	7	0.804	755.543	7555.43	7.55543	37.7772	0.0377772	3.77772
	8	0.911	861.453	8614.53	8.61453	43.0726	0.0430726	4.30726
	9	0.864	814.932	8149.32	8.14932	40.7466	0.0407466	4.07466
Aphid	10	0.216	173.535	1735.35	1.73535	8.67675	0.00867675	0.867675
	11	0.276	232.924	2329.24	2.32924	11.6462	0.0116462	1.16462
	12	0.211	168.586	1685.86	1.68586	8.4293	0.0084293	0.84293
0.1mM+aphid	13	0.456	411.089	4110.89	4.11089	20.5545	0.0205545	2.05545
	14	0.376	331.905	3319.05	3.31905	16.5952	0.0165952	1.65952
	15	0.431	386.344	3863.44	3.86344	19.3172	0.0193172	1.93172
1mMJA+aphid	16	0.234	191.352	1913.52	1.91352	9.56758	0.00956758	0.956758
	17	0.321	277.465	2774.65	2.77465	13.8733	0.0138733	1.38733
	18	0.564	517.989	5179.89	5.17989	25.8994	0.0258994	2.58994
control v2	19	0.945	895.106	8951.06	8.95106	44.7553	0.0447553	4.47553
	20	0.994	943.607	9436.07	9.43607	47.1804	0.0471804	4.71804
	21	1.121	1069.31	10693.1	10.6931	53.4657	0.0534657	5.34657
0.1mM JA	22	0.803	754.553	7545.53	7.54553	37.7277	0.0377277	3.77277
	23	0.827	778.309	7783.09	7.78309	38.9154	0.0389154	3.89154
	24	0.834	785.238	7852.38	7.85238	39.2619	0.0392619	3.92619
1mM JA	25	0.895	845.616	8456.16	8.45616	42.2808	0.0422808	4.22808
	26	0.795	746.635	7466.35	7.46635	37.3317	0.0373317	3.73317
	27	0.693	645.674	6456.74	6.45674	32.2837	0.0322837	3.22837
Aphid	28	0.218	175.515	1755.15	1.75515	8.77573	0.00877573	0.877573
	29	0.239	196.301	1963.01	1.96301	9.81503	0.00981503	0.981503
	30	0.258	215.107	2151.07	2.15107	10.7553	0.0107553	1.07553
0.1mM+aphid	31	0.301	257.669	2576.69	2.57669	12.8834	0.0128834	1.28834
	32	0.338	294.292	2942.92	2.94292	14.7146	0.0147146	1.47146
	33	0.379	334.874	3348.74	3.34874	16.7437	0.0167437	1.67437
1mMJA+aphid	34	0.297	253.71	2537.1	2.5371	12.6855	0.0126855	1.26855
	35	0.446	401.191	4011.91	4.01191	20.0596	0.0200596	2.00596
	36	0.469	423.957	4239.57	4.23957	21.1978	0.0211978	2.11978
		0.312	268.557	2685.57	2.68557	13.4278	0.0134278	1.34278
		0.344	300.231	3002.31	3.00231	15.0115	0.0150115	1.50115
		0.425	380.405	3804.05	3.80405	19.0203	0.0190203	1.90203
		0.294	250.74	2507.4	2.5074	12.537	0.012537	1.2537
		0.241	198.28	1982.8	1.9828	9.91401	0.00991401	0.991401
		0.239	196.301	1963.01	1.96301	9.81503	0.00981503	0.981503
		0.258	215.107	2151.07	2.15107	10.7553	0.0107553	1.07553
		0.301	257.669	2576.69	2.57669	12.8834	0.0128834	1.28834
		0.338	294.292	2942.92	2.94292	14.7146	0.0147146	1.47146
		0.379	334.874	3348.74	3.34874	16.7437	0.0167437	1.67437
		0.297	253.71	2537.1	2.5371	12.6855	0.0126855	1.26855
		0.466	420.987	4209.87	4.20987	21.0494	0.0210494	2.10494
		0.469	423.957	4239.57	4.23957	21.1978	0.0211978	2.11978
		0.477	431.875	4318.75	4.31875	21.5938	0.0215938	2.15938
		0.470667	425.607	4256.07	4.25607	21.2803	0.0212803	2.12803
		0.443	398.222	3982.22	3.98222	19.9111	0.0199111	1.99111
		0.481	435.835	4358.35	4.35835	21.7917	0.0217917	2.17917
		0.447	402.181	4021.81	4.02181	20.1091	0.0201091	2.01091
		0.457	412.079	4120.79	4.12079	20.604	0.020604	2.0604
		0.444	399.212	3992.12	3.99212	19.9606	0.0199606	1.99606
		0.441	396.242	3962.42	3.96242	19.8121	0.0198121	1.98121
		0.412	367.538	3675.38	3.67538	18.3769	0.0183769	1.83769
		0.432333	387.664	3876.64	3.87664	19.3832	0.0193832	1.93832
		0.457	412.079	4120.79	4.12079	20.604	0.020604	2.0604
		0.444	399.212	3992.12	3.99212	19.9606	0.0199606	1.99606
		0.448	403.171	4031.71	4.03171	20.1585	0.0201585	2.01585
		0.449667	404.821	4048.21	4.04821	20.241	0.020241	2.0241
		0.445	400.201	4002.01	4.00201	20.0101	0.0200101	2.00101
		0.451	406.14	4061.4	4.0614	20.307	0.020307	2.0307
		0.493	447.712	4477.12	4.47712	22.3856	0.0223856	2.23856
		0.463	418.018	4180.18	4.18018	20.9009	0.0209009	2.09009
		0.444	399.212	3992.12	3.99212	19.9606	0.0199606	1.99606
		0.413	368.528	3685.28	3.68528	18.4264	0.0184264	1.84264
		0.381	336.854	3368.54	3.36854	16.8427	0.0168427	1.68427
		0.412667	368.198	3681.98	3.68198	18.4099	0.0184099	1.84099
		0.384	339.823	3398.23	3.39823	16.9912	0.0169912	1.69912
		0.354	310.129	3101.29	3.10129	15.5064	0.0155064	1.55064
		0.455	410.1	4101	4.101	20.505	0.020505	2.0505
		0.397667	353.35	3533.5	3.5335	17.6675	0.0176675	1.76675
		0.462	417.028	4170.28	4.17028	20.8514	0.0208514	2.08514
		0.411	366.548	3665.48	3.66548	18.3274	0.0183274	1.83274
		0.372	327.945	3279.45	3.27945	16.3973	0.0163973	1.63973
		0.415	370.507	3705.07	3.70507	18.5254	0.0185254	1.85254
		0.37	325.966	3259.66	3.25966	16.2983	0.0162983	1.62983
		0.373	328.935	3289.35	3.28935	16.4468	0.0164468	1.64468
		0.331	287.363	2873.63	2.87363	14.3682	0.0143682	1.43682			83	1.102	1050.51	10505.1	10.5051	52.5253	0.0525253
		0.358	314.088	3140.88	3.14088	15.7044	0.0157044	1.57044			84	0.871	821.861	8218.61	8.21861	41.093	0.041093
		0.377	332.894	3328.94	3.32894	16.6447	0.0166447	1.66447			85	1.062	1010.91	10109.1	10.1091	50.5457	0.0505457
		0.369	324.976	3249.76	3.24976	16.2488	0.0162488	1.62488			86	1.056	1004.98	10049.8	10.0498	50.2488	0.0502488
		0.371	326.956	3269.56	3.26956	16.3478	0.0163478	1.63478			87	0.934	884.219	8842.19	8.84219	44.2109	0.0442109
		0.372333	328.275	3282.75	3.28275	16.4138	0.0164138	1.64138			88	0.9	850.565	8505.65	8.50565	42.5282	0.0425282
		0.376	331.905	3319.05	3.31905	16.5952	0.0165952	1.65952			89	1.169	1116.82	11168.2	11.1682	55.8412	0.0558412
		0.33	286.373	2863.73	2.86373	14.3187	0.0143187	1.43187			90	0.908	858.483	8584.83	8.58483	42.9242	0.0429242
		0.37	325.966	3259.66	3.25966	16.2983	0.0162983	1.62983			91	1.085	1033.68	10336.8	10.3368	51.684	0.051684
		0.358667	314.748	3147.48	3.14748	15.7374	0.0157374	1.57374			92	1.102	1050.51	10505.1	10.5051	52.5253	0.0525253
		0.366	322.006	3220.06	3.22006	16.1003	0.0161003	1.61003			93	0.642	595.194	5951.94	5.95194	29.7597	0.0297597
		0.377	332.894	3328.94	3.32894	16.6447	0.0166447	1.66447			94	0.942	892.137	8921.37	8.92137	44.6069	0.0446069
		0.364	320.027	3200.27	3.20027	16.0013	0.0160013	1.60013			95	1.048	997.057	9970.57	9.97057	49.8528	0.0498528
		0.369	324.976	3249.76	3.24976	16.2488	0.0162488	1.62488			96	0.824	775.339	7753.39	7.75339	38.767	0.038767
		0.359	315.078	3150.78	3.15078	15.7539	0.0157539	1.57539			97	1.103	1051.5	10515	10.515	52.5748	0.0525748
		0.332	288.353	2883.53	2.88353	14.4176	0.0144176	1.44176			98	0.93	880.259	8802.59	8.80259	44.013	0.044013
		0.364	320.027	3200.27	3.20027	16.0013	0.0160013	1.60013			99	0.999	948.556	9485.56	9.48556	47.4278	0.0474278
		0.351667	307.819	3078.19	3.07819	15.391	0.015391	1.5391			100	1.155	1102.97	11029.7	11.0297	55.1483	0.0551483
		0.361	317.057	3170.57	3.17057	15.8529	0.0158529	1.58529			101	0.412	367.538	3675.38	3.67538	18.3769	0.0183769
		0.35	306.169	3061.69	3.06169	15.3085	0.0153085	1.53085			102	0.357	313.098	3130.98	3.13098	15.6549	0.0156549
		0.358	314.088	3140.88	3.14088	15.7044	0.0157044	1.57044			103	0.516	470.478	4704.78	4.70478	23.5239	0.0235239
		0.356333	312.438	3124.38	3.12438	15.6219	0.0156219	1.56219			104	0.948	898.076	8980.76	8.98076	44.9038	0.0449038
		0.369	324.976	3249.76	3.24976	16.2488	0.0162488	1.62488			105	1.127	1075.25	10752.5	10.7525	53.7626	0.0537626
		0.371	326.956	3269.56	3.26956	16.3478	0.0163478	1.63478			106	0.914	864.422	8644.22	8.64422	43.2211	0.0432211
		0.366	322.006	3220.06	3.22006	16.1003	0.0161003	1.61003			107	1.15	1098.02	10980.2	10.9802	54.9009	0.0549009
		0.368667	324.646	3246.46	3.24646	16.2323	0.0162323	1.62323			108	1.015	964.393	9643.93	9.64393	48.2197	0.0482197
		0.361	317.057	3170.57	3.17057	15.8529	0.0158529	1.58529			109	0.417	372.487	3724.87	3.72487	18.6243	0.0186243
		0.369	324.976	3249.76	3.24976	16.2488	0.0162488	1.62488			110	0.894	844.626	8446.26	8.44626	42.2313	0.0422313
		0.342	298.251	2982.51	2.98251	14.9126	0.0149126	1.49126			111	0.411	366.548	3665.48	3.66548	18.3274	0.0183274
		0.357333	313.428	3134.28	3.13428	15.6714	0.0156714	1.56714			112	0.972	921.831	9218.31	9.21831	46.0916	0.0460916
		0.318	274.496	2744.96	2.74496	13.7248	0.0137248	1.37248			113	0.963	912.923	9129.23	9.12923	45.6462	0.0456462
		0.36	316.068	3160.68	3.16068	15.8034	0.0158034	1.58034			114	1.028	977.261	9772.61	9.77261	48.863	0.048863
		0.322	278.455	2784.55	2.78455	13.9227	0.0139227	1.39227			115	0.957	906.984	9069.84	9.06984	45.3492	0.0453492
		0.333333	289.673	2896.73	2.89673	14.4836	0.0144836	1.44836			116	1.085	1033.68	10336.8	10.3368	51.684	0.051684
		0.359	315.078	3150.78	3.15078	15.7539	0.0157539	1.57539			117	0.605	558.571	5585.71	5.58571	27.9286	0.0279286
		0.339	295.282	2952.82	2.95282	14.7641	0.0147641	1.47641			118	0.7	652.603	6526.03	6.52603	32.6302	0.0326302
		0.342	298.251	2982.51	2.98251	14.9126	0.0149126	1.49126			119	1.03	979.24	9792.4	9.7924	48.962	0.048962
		0.346667	302.87	3028.7	3.0287	15.1435	0.0151435	1.51435			120	0.509	463.549	4635.49	4.63549	23.1775	0.0231775
		0.363	319.037	3190.37	3.19037	15.9519	0.0159519	1.59519			121	0.796	747.625	7476.25	7.47625	37.3812	0.0373812
		0.347	303.2	3032	3.032	15.16	0.01516	1.516			122	1.135	1083.17	10831.7	10.8317	54.1585	0.0541585
		0.364	320.027	3200.27	3.20027	16.0013	0.0160013	1.60013			123	0.63	583.316	5833.16	5.83316	29.1658	0.0291658
		0.358	314.088	3140.88	3.14088	15.7044	0.0157044	1.57044			124	1.035	984.189	9841.89	9.84189	49.2095	0.0492095
		0.346	302.21	3022.1	3.0221	15.1105	0.0151105	1.51105			125	1.002	951.526	9515.26	9.51526	47.5763	0.0475763
		0.333	289.343	2893.43	2.89343	14.4671	0.0144671	1.44671			126	0.869	819.881	8198.81	8.19881	40.994	0.040994
		0.348	304.19	3041.9	3.0419	15.2095	0.0152095	1.52095			127	0.906	856.504	8565.04	8.56504	42.8252	0.0428252
		0.342333	298.581	2985.81	2.98581	14.929	0.014929	1.4929			128	0.357	313.098	3130.98	3.13098	15.6549	0.0156549
		0.48	434.845	4348.45	4.34845	21.7422	0.0217422	2.17422			129	1.042	991.118	9911.18	9.91118	49.5559	0.0495559
		0.489	443.753	4437.53	4.43753	22.1877	0.0221877	2.21877			130	0.713	665.471	6654.71	6.65471	33.2735	0.0332735
		0.4845	439.299	4392.99	4.39299	21.9649	0.0219649	2.19649			131	0.803	754.553	7545.53	7.54553	37.7277	0.0377277
		0.48675	441.526	4415.26	4.41526	22.0763	0.0220763	2.20763			132	0.618	571.439	5714.39	5.71439	28.5719	0.0285719
		0.486	440.784	4407.84	4.40784	22.0392	0.0220392	2.20392			133	0.858	808.993	8089.93	8.08993	40.4496	0.0404496
		0.418	373.477	3734.77	3.73477	18.6738	0.0186738	1.86738			134	0.117	75.5438	755.438	0.755438	3.77719	0.00377719
		0.452	407.13	4071.3	4.0713	20.3565	0.0203565	2.03565			135	0.697	649.634	6496.34	6.49634	32.4817	0.0324817
		0.435	390.303	3903.03	3.90303	19.5152	0.0195152	1.95152			136	0.223	180.464	1804.64	1.80464	9.02318	0.00902318
		0.478	432.865	4328.65	4.32865	21.6433	0.0216433	2.16433			137	0.739	691.206	6912.06	6.91206	34.5603	0.0345603
		0.481	435.835	4358.35	4.35835	21.7917	0.0217917	2.17917			138	1.142	1090.1	10901	10.901	54.505	0.054505
		0.4795	434.35	4343.5	4.3435	21.7175	0.0217175	2.17175			139	0.909	859.473	8594.73	8.59473	42.9737	0.0429737
		0.48025	435.092	4350.92	4.35092	21.7546	0.0217546	2.17546			140	1.162	1109.9	11099	11.099	55.4948	0.0554948
		0.484	438.804	4388.04	4.38804	21.9402	0.0219402	2.19402			141	0.781	732.778	7327.78	7.32778	36.6389	0.0366389
		0.461	416.038	4160.38	4.16038	20.8019	0.0208019	2.08019			142	0.747	699.124	6991.24	6.99124	34.9562	0.0349562
		0.4725	427.421	4274.21	4.27421	21.3711	0.0213711	2.13711			143	0.934	884.219	8842.19	8.84219	44.2109	0.0442109
		0.46675	421.73	4217.3	4.2173	21.0865	0.0210865	2.10865			144	0.721	673.389	6733.89	6.73389	33.6695	0.0336695
		0.411	366.548	3665.48	3.66548	18.3274	0.0183274	1.83274			145	1.093	1041.6	10416	10.416	52.0799	0.0520799
		0.456	411.089	4110.89	4.11089	20.5545	0.0205545	2.05545			146	0.977	926.78	9267.8	9.2678	46.339	0.046339
		0.4335	388.819	3888.19	3.88819	19.4409	0.0194409	1.94409			147	0.594	547.683	5476.83	5.47683	27.3842	0.0273842
		0.44475	399.954	3999.54	3.99954	19.9977	0.0199977	1.99977			148	1.028	977.261	9772.61	9.77261	48.863	0.048863
		0.479	433.855	4338.55	4.33855	21.6927	0.0216927	2.16927			149	0.517	471.468	4714.68	4.71468	23.5734	0.0235734
		0.382	337.843	3378.43	3.37843	16.8922	0.0168922	1.68922			150	0.903	853.534	8535.34	8.53534	42.6767	0.0426767
		0.4305	385.849	3858.49	3.85849	19.2925	0.0192925	1.92925			151	0.739	691.206	6912.06	6.91206	34.5603	0.0345603
		0.40625	361.846	3618.46	3.61846	18.0923	0.0180923	1.80923			152	0.345	301.22	3012.2	3.0122	15.061	0.015061
		0.381	336.854	3368.54	3.36854	16.8427	0.0168427	1.68427			153	0.638	591.235	5912.35	5.91235	29.5617	0.0295617
		0.438	393.273	3932.73	3.93273	19.6636	0.0196636	1.96636			154	0.532	486.315	4863.15	4.86315	24.3157	0.0243157
		0.4095	365.063	3650.63	3.65063	18.2532	0.0182532	1.82532			155	1.043	992.108	9921.08	9.92108	49.6054	0.0496054
		0.42375	379.168	3791.68	3.79168	18.9584	0.0189584	1.89584			156	1.026	975.281	9752.81	9.75281	48.7641	0.0487641
		0.422	377.436	3774.36	3.77436	18.8718	0.0188718	1.88718			157	0.731	683.287	6832.87	6.83287	34.1644	0.0341644
		0.381	336.854	3368.54	3.36854	16.8427	0.0168427	1.68427			158	1.048	997.057	9970.57	9.97057	49.8528	0.0498528
		0.4015	357.145	3571.45	3.57145	17.8572	0.0178572	1.78572			159	0.509	463.549	4635.49	4.63549	23.1775	0.0231775
		0.39125	346.999	3469.99	3.46999	17.35	0.01735	1.735			160	0.337	293.302	2933.02	2.93302	14.6651	0.0146651
		0.378	333.884	3338.84	3.33884	16.6942	0.0166942	1.66942			161	0.899	849.575	8495.75	8.49575	42.4788	0.0424788
		0.37	325.966	3259.66	3.25966	16.2983	0.0162983	1.62983			162	1.056	1004.98	10049.8	10.0498	50.2488	0.0502488
		0.374	329.925	3299.25	3.29925	16.4962	0.0164962	1.64962			163	1.137	1085.15	10851.5	10.8515	54.2575	0.0542575
		0.372	327.945	3279.45	3.27945	16.3973	0.0163973	1.63973			164	0.95	900.055	9000.56	9.00056	45.0028	0.0450028
		0.365	321.017	3210.17	3.21017	16.0508	0.0160508	1.60508			165	0.623	576.388	5763.88	5.76388	28.8194	0.0288194
		0.318	274.496	2744.96	2.74496	13.7248	0.0137248	1.37248			166	0.557	511.06	5110.6	5.1106	25.553	0.025553
		0.3415	297.756	2977.56	2.97756	14.8878	0.0148878	1.48878			167	0.876	826.81	8268.1	8.2681	41.3405	0.0413405
		0.32975	286.126	2861.26	2.86126	14.3063	0.0143063	1.43063			168	0.737	689.226	6892.26	6.89226	34.4613	0.0344613
		0.319	275.485	2754.85	2.75485	13.7743	0.0137743	1.37743			169	0.85	801.074	8010.74	8.01074	40.0537	0.0400537
		0.389	344.772	3447.72	3.44772	17.2386	0.0172386	1.72386			170	0.93	880.259	8802.59	8.80259	44.013	0.044013
		0.354	310.129	3101.29	3.10129	15.5064	0.0155064	1.55064			171	0.89	840.667	8406.67	8.40667	42.0333	0.0420333
		0.3715	327.45	3274.5	3.2745	16.3725	0.0163725	1.63725			172	0.864	814.932	8149.32	8.14932	40.7466	0.0407466
		0.384	339.823	3398.23	3.39823	16.9912	0.0169912	1.69912			173	0.511	465.529	4655.29	4.65529	23.2764	0.0232764
		0.387	342.792	3427.92	3.42792	17.1396	0.0171396	1.71396			174	0.861	811.962	8119.62	8.11962	40.5981	0.0405981
		0.3855	341.308	3413.08	3.41308	17.0654	0.0170654	1.70654			175	1.094	1042.59	10425.9	10.4259	52.1294	0.0521294
		0.38625	342.05	3420.5	3.4205	17.1025	0.0171025	1.71025			176	0.94	890.157	8901.57	8.90157	44.5079	0.0445079
		0.332	288.353	2883.53	2.88353	14.4176	0.0144176	1.44176			177	0.986	935.689	9356.89	9.35689	46.7844	0.0467844
		0.319	275.485	2754.85	2.75485	13.7743	0.0137743	1.37743			178	0.607	560.551	5605.51	5.60551	28.0275	0.0280275
		0.3255	281.919	2819.19	2.81919	14.096	0.014096	1.4096			179	0.879	829.779	8297.79	8.29779	41.4889	0.0414889
		0.32225	278.702	2787.02	2.78702	13.9351	0.0139351	1.39351			180	0.769	720.9	7209	7.209	36.045	0.036045
		0.321	277.465	2774.65	2.77465	13.8733	0.0138733	1.38733			181	0.335	291.322	2913.22	2.91322	14.5661	0.0145661
		0.3	256.679	2566.79	2.56679	12.834	0.012834	1.2834			182	0.701	653.593	6535.93	6.53593	32.6796	0.0326796
		0.3105	267.072	2670.72	2.67072	13.3536	0.0133536	1.33536			183	0.463	418.018	4180.18	4.18018	20.9009	0.0209009
		0.30525	261.876	2618.76	2.61876	13.0938	0.0130938	1.30938			184	0.704	656.562	6565.62	6.56562	32.8281	0.0328281
		0.314	270.536	2705.36	2.70536	13.5268	0.0135268	1.35268			185	0.997	946.577	9465.77	9.46577	47.3288	0.0473288
		0.379	334.874	3348.74	3.34874	16.7437	0.0167437	1.67437			186	0.741	693.185	6931.85	6.93185	34.6593	0.0346593
		0.3465	302.705	3027.05	3.02705	15.1353	0.0151353	1.51353			187	0.908	858.483	8584.83	8.58483	42.9242	0.0429242
		0.36275	318.79	3187.9	3.1879	15.9395	0.0159395	1.59395			188	0.881	831.759	8317.59	8.31759	41.5879	0.0415879
		0.388	343.782	3437.82	3.43782	17.1891	0.0171891	1.71891			189	0.875	825.82	8258.2	8.2582	41.291	0.041291
		0.317	273.506	2735.06	2.73506	13.6753	0.0136753	1.36753			190	0.664	616.97	6169.7	6.1697	30.8485	0.0308485
		0.3525	308.644	3086.44	3.08644	15.4322	0.0154322	1.54322			191	0.73	682.297	6822.97	6.82297	34.1149	0.0341149
		0.33475	291.075	2910.75	2.91075	14.5537	0.0145537	1.45537			192	0.795	746.635	7466.35	7.46635	37.3317	0.0373317
		0.403	358.629	3586.29	3.58629	17.9315	0.0179315	1.79315
		0.408	363.578	3635.78	3.63578	18.1789	0.0181789	1.81789
		0.4055	361.104	3611.04	3.61104	18.0552	0.0180552	1.80552
		0.40675	362.341	3623.41	3.62341	18.1171	0.0181171	1.81171
		0.496	450.682	4506.82	4.50682	22.5341	0.0225341	2.25341
		0.499	453.651	4536.51	4.53651	22.6826	0.0226826	2.26826
		0.4975	452.166	4521.66	4.52166	22.6083	0.0226083	2.26083
		0.49825	452.909	4529.09	4.52909	22.6454	0.0226454	2.26454
		0.468	422.967	4229.67	4.22967	21.1484	0.0211484	2.11484
		0.411	366.548	3665.48	3.66548	18.3274	0.0183274	1.83274
		0.4395	394.757	3947.57	3.94757	19.7379	0.0197379	1.97379
		0.42525	380.653	3806.53	3.80653	19.0326	0.0190326	1.90326
		0.472	426.926	4269.26	4.26926	21.3463	0.0213463	2.13463
		0.539	493.244	4932.44	4.93244	24.6622	0.0246622	2.46622
		0.5055	460.085	4600.85	4.60085	23.0042	0.0230042	2.30042
		0.52225	476.664	4766.64	4.76664	23.8332	0.0238332	2.38332
		0.391	346.752	3467.52	3.46752	17.3376	0.0173376	1.73376
		0.394	349.721	3497.21	3.49721	17.4861	0.0174861	1.74861
		0.3925	348.236	3482.36	3.48236	17.4118	0.0174118	1.74118
		0.39325	348.979	3489.79	3.48979	17.4489	0.0174489	1.74489
		0.446	401.191	4011.91	4.01191	20.0596	0.0200596	2.00596
		0.398	353.68	3536.8	3.5368	17.684	0.017684	1.7684
		0.422	377.436	3774.36	3.77436	18.8718	0.0188718	1.88718
		0.41	365.558	3655.58	3.65558	18.2779	0.0182779	1.82779
		0.456	411.089	4110.89	4.11089	20.5545	0.0205545	2.05545
		0.389	344.772	3447.72	3.44772	17.2386	0.0172386	1.72386
		0.4225	377.931	3779.31	3.77931	18.8965	0.0188965	1.88965
		0.40575	361.351	3613.51	3.61351	18.0676	0.0180676	1.80676
		0.391	346.752	3467.52	3.46752	17.3376	0.0173376	1.73376
		0.399	354.67	3546.7	3.5467	17.7335	0.0177335	1.77335
		0.395	350.711	3507.11	3.50711	17.5355	0.0175355	1.75355
		0.397	352.691	3526.91	3.52691	17.6345	0.0176345	1.76345
		0.401	356.65	3566.5	3.5665	17.8325	0.0178325	1.78325
		0.389	344.772	3447.72	3.44772	17.2386	0.0172386	1.72386
		0.395	350.711	3507.11	3.50711	17.5355	0.0175355	1.75355
		0.392	347.742	3477.42	3.47742	17.3871	0.0173871	1.73871
		0.397	352.691	3526.91	3.52691	17.6345	0.0176345	1.76345
		0.359	315.078	3150.78	3.15078	15.7539	0.0157539	1.57539
		0.378	333.884	3338.84	3.33884	16.6942	0.0166942	1.66942
		0.3685	324.481	3244.81	3.24481	16.224	0.016224	1.6224
		0.392	347.742	3477.42	3.47742	17.3871	0.0173871	1.73871
		0.371	326.956	3269.56	3.26956	16.3478	0.0163478	1.63478
		0.3815	337.349	3373.49	3.37349	16.8674	0.0168674	1.68674
		0.37625	332.152	3321.52	3.32152	16.6076	0.0166076	1.66076
		0.381	336.854	3368.54	3.36854	16.8427	0.0168427	1.68427
		0.389	344.772	3447.72	3.44772	17.2386	0.0172386	1.72386
		0.385	340.813	3408.13	3.40813	17.0406	0.0170406	1.70406
		0.387	342.792	3427.92	3.42792	17.1396	0.0171396	1.71396
		0.307	263.608	2636.08	2.63608	13.1804	0.0131804	1.31804
		0.311	267.567	2675.67	2.67567	13.3783	0.0133783	1.33783
		0.309	265.587	2655.87	2.65587	13.2794	0.0132794	1.32794
		0.31	266.577	2665.77	2.66577	13.3289	0.0133289	1.33289
		0.392	347.742	3477.42	3.47742	17.3871	0.0173871	1.73871
		0.313	269.547	2695.47	2.69547	13.4773	0.0134773	1.34773
		0.3525	308.644	3086.44	3.08644	15.4322	0.0154322	1.54322
		0.33275	289.095	2890.95	2.89095	14.4548	0.0144548	1.44548
		0.329	285.383	2853.83	2.85383	14.2692	0.0142692	1.42692
		0.319	275.485	2754.85	2.75485	13.7743	0.0137743	1.37743
		0.324	280.434	2804.34	2.80434	14.0217	0.0140217	1.40217
		0.3215	277.96	2779.6	2.7796	13.898	0.013898	1.3898
		0.301	257.669	2576.69	2.57669	12.8834	0.0128834	1.28834
		0.408	363.578	3635.78	3.63578	18.1789	0.0181789	1.81789
		0.3545	310.624	3106.24	3.10624	15.5312	0.0155312	1.55312
		0.38125	337.101	3371.01	3.37101	16.8551	0.0168551	1.68551

## Sheet: TSB mean 1
Sr. No.						Borlaug2015 V1						Zincol2015 V2
1	control v1	4.85166
2		4.08456				JA			JA+APHID					JA			JA+APHID
3		3.80741			CONTROL	0.1mM JA	1mM JA	Aphid	0.1mM+aphid	1mM+aphid			CONTROL	0.1mM JA	1mM JA	Aphid	0.1mM+aphid	1mM+aphid
4	0.1mM JA	3.6144		R1	4.85166	3.6144	2.09009	2.05545	2.58994	1.84264		R1	3.56986	3.58965	3.52531	2.42663	2.83245	0.857777
5		3.65894		R2	4.08456	3.65894	3.43128	1.61498	2.0307	1.5061		R2	3.04526	4.80217	3.57481	1.35268	2.49591	1.05574
6		2.05545		R3	3.80741	2.05545	3.47582	1.38733	1.5061	1.49126		R3	4.139	2.49096	4.48048	1.12008	2.69387	1.35763
7	1mM JA	2.09009		AVERAGE	4.24788	3.10959	2.99907	1.68592	2.04225	1.61333		AVERAGE	3.5847	3.6276	3.8602	1.63313	2.67408	1.09038
8		3.43128		SD	0.540943	0.91319	0.787511	0.339663	0.542013	0.198724		SD	0.547021	1.15607	0.537749	0.696961	0.169139	0.251721
9		3.47582		SE	0.312323	0.527246	0.454683	0.19611	0.312941	0.114736		SE	0.315832	0.667477	0.310478	0.402403	0.0976552	0.145336
10	Aphid	2.05545
11		1.61498
12		1.38733			Borlaug-2015	Zincol-2015
13	0.1mM+aphid	2.58994		Control	4.24788	3.5847
14		2.0307		0.1 Mm JA	3.10959	3.6276
15		1.5061		1 mM JA	2.99907	3.8602
16	1mMJA+aphid	1.84264		Aphid	1.68592	1.63313
17		1.5061		0.1 mM + aphid	2.04225	2.67408
18		1.49126		1 mM JA + aphid	1.61333	1.09038
19	control v2	3.56986
20		3.04526		Control	0.312323	0.315832
21		4.139		0.1 Mm JA	0.527246	0.667477
22	0.1mM JA	3.58965		1 mM JA	0.454683	0.310478
23		4.80217		Aphid	0.19611	0.402403
24		2.49096		0.1 mM + aphid	0.312941	0.0976552
25	1mM JA	3.52531		1 mM JA + aphid	0.114736	0.145336
26		3.57481
27		4.48048
28	Aphid	2.42663
29		1.35268
30		1.12008
31	0.1mM+aphid	2.83245
32		2.49591
33		2.69387
34	1mMJA+aphid	0.857777
35		1.05574
36		1.35763

## Sheet: TSP mean2
Sr. No.						Borlaug2015 V1						Zincol2015 V2
1	control v1	4.41119
2		3.91629				JA			JA+APHID					JA			JA+APHID
3		4.47553			CONTROL	0.1mM JA	1mM JA	Aphid	0.1mM+aphid	1mM+aphid			CONTROL	0.1mM JA	1mM JA	Aphid	0.1mM+aphid	1mM+aphid
4	0.1mM JA	3.66389		R1	4.41119	3.66389	3.58965	2.83245	2.83245	1.2537		R1	3.38179	3.73317	3.72823	1.5061	2.71367	1.83769
5		3.25312		R2	3.91629	3.25312	3.43623	1.86243	2.70377	0.991401		R2	3.72823	4.03507	3.75297	1.12008	2.05545	2.0604
6		3.53026		R3	4.47553	3.53026	3.54016	0.852828	1.89213	0.981503		R3	4.20828	3.67379	4.61411	0.847879	1.5061	1.99606
7	1mM JA	3.58965		AVERAGE	4.26767	3.48242	3.52202	1.84924	2.47612	1.07553		AVERAGE	3.77277	3.81401	4.03177	1.15802	2.09174	1.96471
8		3.43623		SD	0.306002	0.209523	0.0783035	0.989876	0.509824	0.154375		SD	0.415042	0.193731	0.504471	0.330748	0.604602	0.114614
9		3.54016		SE	0.176675	0.120972	0.0452099	0.571522	0.294356	0.0891313		SE	0.239632	0.111854	0.291265	0.190963	0.349077	0.0661746
10	Aphid	2.83245
11		1.86243
12		0.852828			Borlaug-2015	Zincol-2015
13	0.1mM+aphid	2.83245		Control	4.26767	3.77277
14		2.70377		0.1 Mm JA	3.48242	3.81401
15		1.89213		1 mM JA	3.52202	4.03177
16	1mMJA+aphid	1.2537		Aphid	1.84924	1.15802
17		0.991401		0.1 mM + aphid	2.47612	2.09174
18		0.981503		1 mM JA + aphid	1.07553	1.96471
19	control v2	3.38179
20		3.72823		Control	0.176675	0.239632
21		4.20828		0.1 Mm JA	0.120972	0.111854
22	0.1mM JA	3.73317		1 mM JA	0.0452099	0.291265
23		4.03507		Aphid	0.571522	0.190963
24		3.67379		0.1 mM + aphid	0.294356	0.349077
25	1mM JA	3.72823		1 mM JA + aphid	0.0891313	0.0661746
26		3.75297
27		4.61411
28	Aphid	1.5061
29		1.12008
30		0.847879
31	0.1mM+aphid	2.71367
32		2.05545
33		1.5061
34	1mMJA+aphid	1.83769
35		2.0604
36		1.99606

## Sheet: Mean3
Sr. No.						Borlaug2015 V1						Zincol2015 V2
1	control v1	4.15384
2		5.01003				JA			JA+APHID					JA			JA+APHID
3		4.11425			CONTROL	0.1mM JA	1mM JA	Aphid	0.1mM+aphid	1mM+aphid			CONTROL	0.1mM JA	1mM JA	Aphid	0.1mM+aphid	1mM+aphid
4	0.1mM JA	4.20828		R1	4.15384	4.20828	3.59955	1.29824	2.25836	2.81265		R1	4.70814	2.60479	3.83216	0.857777	1.28834	1.26855
5		3.00072		R2	5.01003	3.00072	4.07466	1.07553	1.4962	2.10989		R2	3.94598	3.76782	4.90115	0.981503	2.05545	1.19431
6		3.3323		R3	4.11425	3.3323	3.86185	0.877573	1.73871	0.847879		R3	5.72269	3.29766	3.20363	1.07553	1.67437	2.11978
7	1mM JA	3.59955		AVERAGE	4.42604	3.51377	3.84535	1.08378	1.83109	1.92347		AVERAGE	4.79227	3.22342	3.97898	0.971605	1.67272	1.52755
8		4.07466		SD	0.506136	0.623901	0.237984	0.210456	0.389385	0.995563		SD	0.891338	0.585056	0.858233	0.109216	0.383554	0.514233
9		3.86185		SE	0.292226	0.36022	0.137404	0.12151	0.224818	0.574805		SE	0.514629	0.337792	0.495516	0.0630577	0.221452	0.296901
10	Aphid	1.29824
11		1.07553
12		0.877573			Borlaug-2015	Zincol-2015
13	0.1mM+aphid	2.25836		Control	4.42604	4.79227
14		1.4962		0.1 Mm JA	3.51377	3.22342
15		1.73871		1 mM JA	3.84535	3.97898
16	1mMJA+aphid	2.81265		Aphid	1.08378	0.971605
17		2.10989		0.1 mM + aphid	1.83109	1.67272
18		0.847879		1 mM JA + aphid	1.92347	1.52755
19	control v2	4.70814
20		3.94598		Control
21		5.72269		0.1 Mm JA
22	0.1mM JA	2.60479		1 mM JA
23		3.76782		Aphid
24		3.29766		0.1 mM + aphid
25	1mM JA	3.83216		1 mM JA + aphid
26		4.90115
27		3.20363
28	Aphid	0.857777
29		0.981503
30		1.07553
31	0.1mM+aphid	1.28834
32		2.05545
33		1.67437
34	1mMJA+aphid	1.26855
35		1.19431
36		2.11978

## Sheet: mean4
Sr. No.						Borlaug2015 V1						Zincol2015 V2
1	control v1	4.73783
2		4.82197				JA			JA+APHID					JA			JA+APHID
3		5.35646			CONTROL	0.1mM JA	1mM JA	Aphid	0.1mM+aphid	1mM+aphid			CONTROL	0.1mM JA	1mM JA	Aphid	0.1mM+aphid	1mM+aphid
4	0.1mM JA	4.08456		R1	4.73783	4.08456	3.77772	0.867675	2.05545	0.956758		R1	4.47553	3.77277	4.22808	0.877573	1.28834	1.26855
5		4.07961		R2	4.82197	4.07961	4.30726	1.16462	1.65952	1.38733		R2	4.71804	3.89154	3.73317	0.981503	1.47146	2.00596
6		4.11425		R3	5.35646	4.11425	4.07466	0.84293	1.93172	2.58994		R3	5.34657	3.92619	3.22837	1.07553	1.67437	2.11978
7	1mM JA	3.77772		AVERAGE	4.97209	4.09281	4.05321	0.958407	1.88223	1.64468		AVERAGE	4.84671	3.8635	3.72988	0.978204	1.47806	1.7981
8		4.30726		SD	0.335527	0.0187368	0.265425	0.179012	0.202549	0.846461		SD	0.449547	0.0804633	0.499862	0.0990222	0.193098	0.46212
9		4.07466		SE	0.193722	0.010818	0.153248	0.103355	0.116945	0.488719		SE	0.259554	0.0464569	0.288604	0.0571722	0.111488	0.266813
10	Aphid	0.867675
11		1.16462
12		0.84293			Borlaug-2015	Zincol-2015
13	0.1mM+aphid	2.05545		Control	4.72087	4.84671
14		1.65952		0.1 mM JA	3.8635	4.09281
15		1.93172		1 mM JA	4.05321	3.72988
16	1mMJA+aphid	0.956758		Aphid	0.958407	0.978204
17		1.38733		0.1 mM + aphid	1.68223	1.77806
18		2.58994		1 mM JA + aphid	1.94468	2.11345
19	control v2	4.47553
20		4.71804		Control	0.193722	0.259554
21		5.34657		0.1 Mm JA	0.010818	0.0464569
22	0.1mM JA	3.77277		1 mM JA	0.153248	0.288604
23		3.89154		Aphid	0.103355	0.0571722
24		3.92619		0.1 mM + aphid	0.116945	0.111488
25	1mM JA	4.22808		1 mM JA + aphid	0.488719	0.266813
26		3.73317
27		3.22837
28	Aphid	0.877573
29		0.981503
30		1.07553
31	0.1mM+aphid	1.28834
32		1.47146
33		1.67437
34	1mMJA+aphid	1.26855
35		2.00596
36		2.11978
